# Supplementary material for: The GATA factor ELT-3 specifies endoderm in Caenorhabditis angaria in an ancestral gene network
Source: Oxford University Press journal article supplement (doi:10.1242/dev.200984), 2022-10-05
Supplement: dev200984supp.pdf [file dev200984supp.pdf]

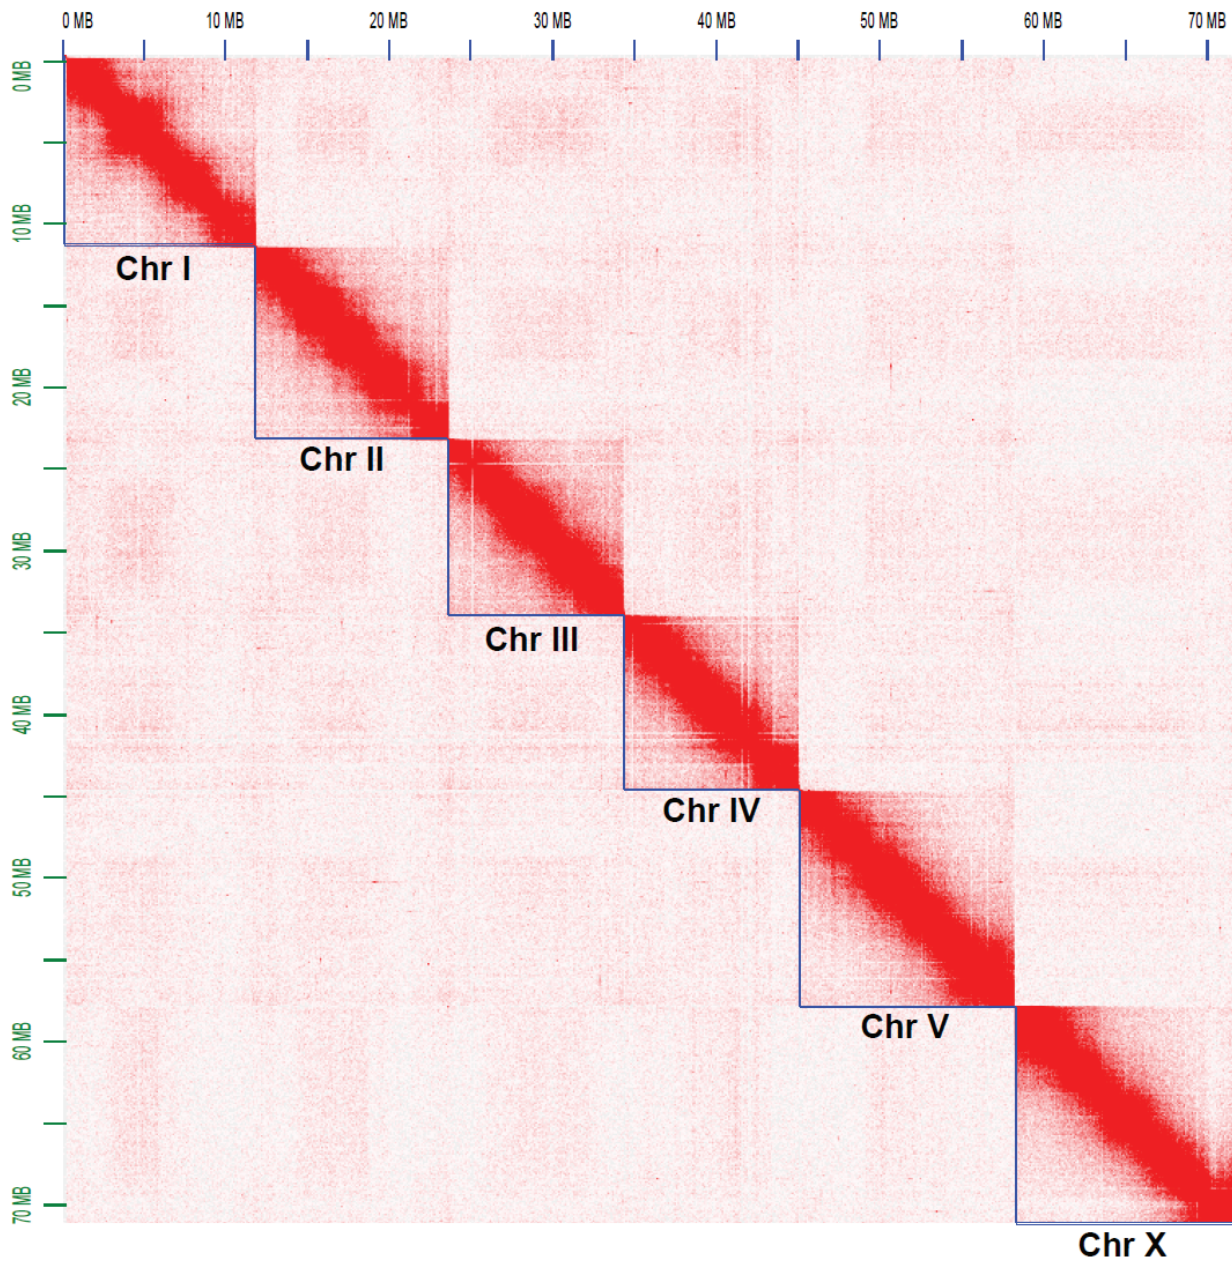

**Fig. S1.** Hi-C map for *C. angaria* PS1010 sequence indicating linkage groups.

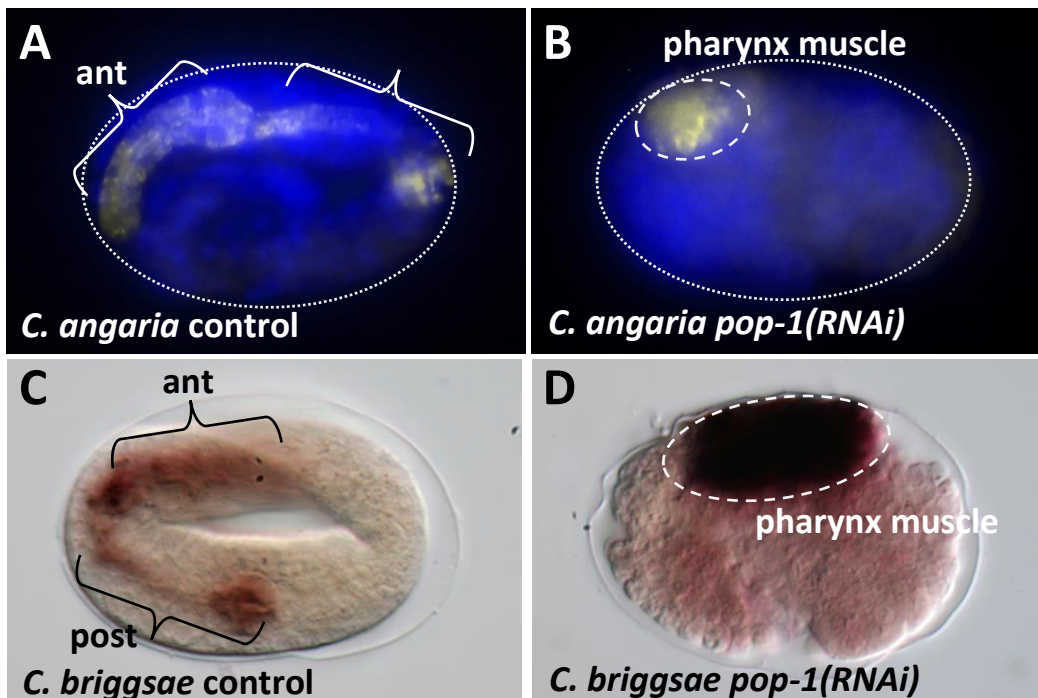

**Fig. S2. smiFISH and *in situ* hybridization to detect *myo-2*.** (A) Representative PS1010 control 3x stage embryo stained with DAPI (blue) and *Can-myo-2* smiFISH probes (yellow). Staining detects the anterior and posterior pharynx (ant ph and post ph, respectively). 10/10 embryos showed similar staining. (B) Representative arrested *Can-pop-1(RNAi)* embryo stained similarly as in (A). Ectopic *Can-myo-2* expression was not apparent in 20/20 embryos. Because *Can-pop-1(RNAi)* embryos do not elongate, proper morphogenesis of the pharynx does not occur. (C,D) Images from a prior work where ectopic *Cbri-myo-2* tissue was detected in *Cbri-pop-1(RNAi)* using an older *in situ* hybridization protocol (Lin et al., 2009). (D) Extra *Cbri-myo-2* expression is seen because of an E to MS transformation, resulting in extra pharynx muscle. Embryos are approximately 50  $\mu$ m long.

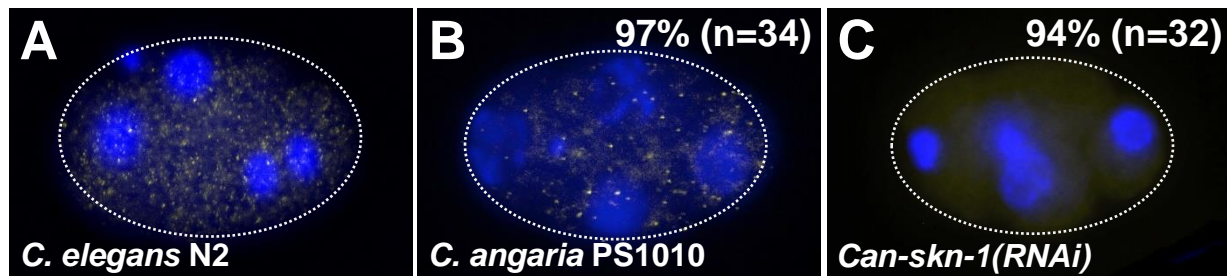

**Fig. S3. Expression of *Cel-skn-1* and control for effectiveness of *Can-skn-1(RNAi)*.** (A) Expression of *C. elegans* *skn-1* by smiFISH. (B) *Can-skn-1* mRNA was detected in 97% (n=34) of controls. (C) *Can-skn-1* mRNA was absent in 94% (n=32) of *Can-skn-1(RNAi)* embryos.



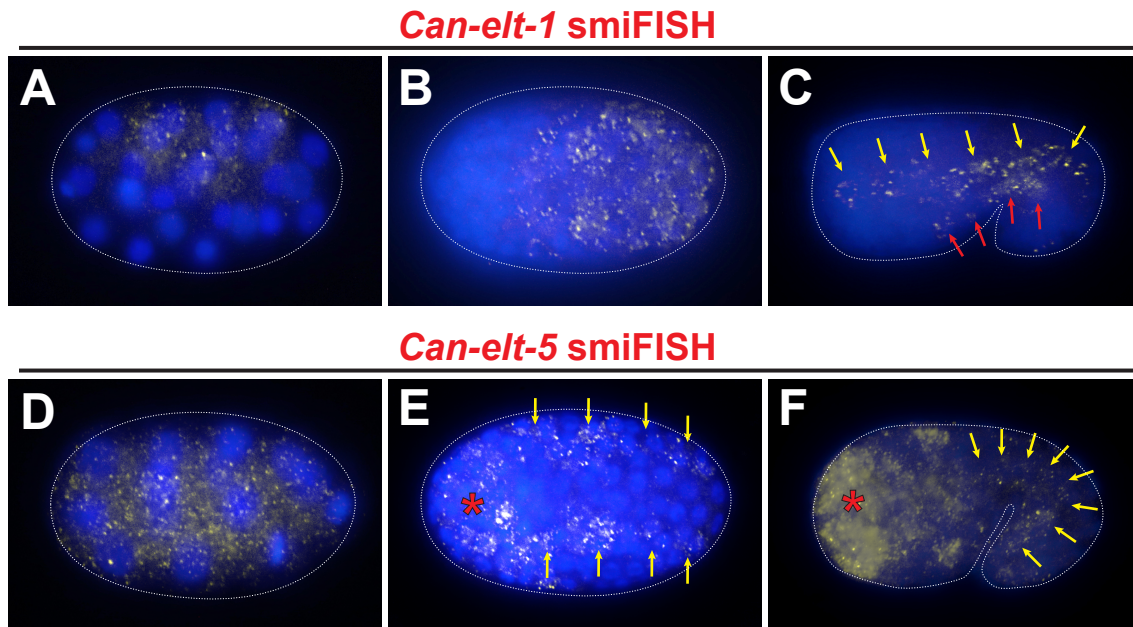

**Fig. S4. Expression of *Can-elt-1* (A-C) and *Can-elt-5* (D-F) by smiFISH.** (A) Expression of *Can-elt-1* was seen in dorsal hypodermal precursors at gastrulation stage. (B) Dorsal aspect showing widespread expression in hypodermal precursors at late one-fold stage. (C) Expression in lateral seam (yellow arrows) and ventral hypodermis (red arrows) at 1.3-fold stage. (D) Widespread expression of *Can-elt-5* in a 16-cell stage embryo. (E) Dorsal aspect showing expression in anterior cells (\*) and lateral hypodermal cells (yellow arrows) of late one-fold stage. (F) Anterior expression (\*) and lateral hypodermal expression (yellow arrows) in 1.5-fold stage. Expression of *Can-elt-1* and *Can-elt-5* is similar to their orthologous genes in *C. elegans* (Page et al., 1997; Koh and Rothman, 2001). Anterior is to the left and dorsal is up in (A), (C), (D), (F).



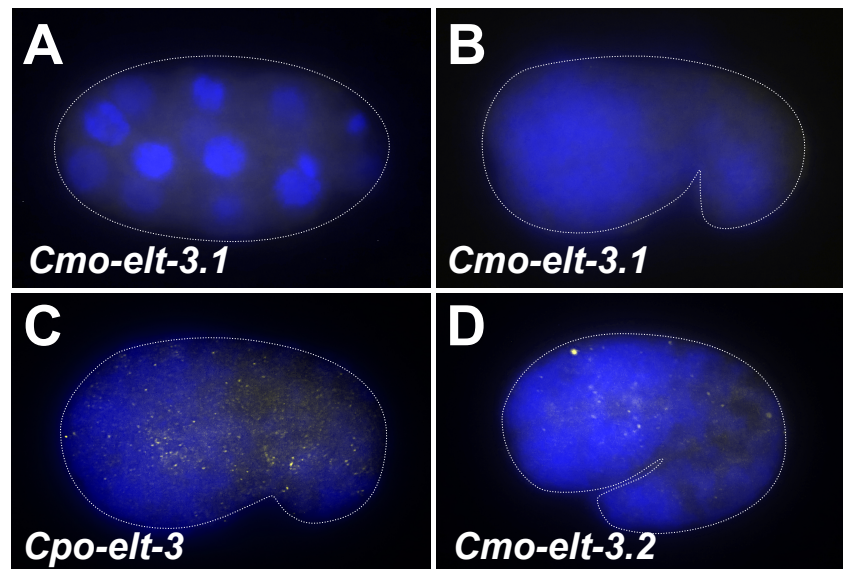

**Fig. S5. Absence of embryonic expression of *Cmo-elt-3.1*, and hypodermal expression of *Cpo-elt-3* and *Cmo-elt-3.2*.** (A) No expression of *Cmo-elt-3.1* was seen in early embryos (2E stage shown here). (B) No hypodermal expression was seen in later stages (comma stage shown here). (C) Expression of *Cpo-elt-3* in hypodermis of a bean stage embryo. (D) Expression of *Cmo-elt-3.2* in 1.7x stage embryo consistent with hypodermal cells.

**Table S1. *C. angaria* genome sequence statistics**

|                       | <i>C. angaria</i><br>(this study) | <i>C. angaria</i><br>(Wormbase;<br>PRJNA51225.WS28<br>5) |
|-----------------------|-----------------------------------|----------------------------------------------------------|
| Assembly size (Mb)    | 71.4                              | 106.0                                                    |
| Number of scaffolds   | 6                                 | 34621                                                    |
| Average (kb)          | 11,895                            | 3                                                        |
| Largest scaffold (kb) | 13,323                            | 868                                                      |
| Gaps (kbp)            | 6                                 | 11,442                                                   |
| GC (%)                | 33.7                              | 35.7                                                     |

**Table S2. Tests of synergy of *elt-3(gk121)* with mutants in the *C. elegans* gut gene network** Percentage of embryos containing gut and average number of gut nuclei made. An integrated *elt-2::GFP* reporter transgene, *wls84*, was used to mark both the presence of gut as well as to count the number of gut nuclei at the end of embryogenesis (Owraghi et al., 2010). In pairwise combinations, none of the comparisons of mutant; *elt-3(+)* with mutant; *elt-3(gk121)* in gut nucleus number is significant ( $p > 0.05$  for all, *t*-test). Single *elt-7* null mutants make gut 100% of the time (McGhee et al., 2007). We did not test *elt-7(tm840)*; *wls84* alone. However, a comparison of *elt-7*; *elt-3* with *elt-3* alone was not significant ( $p > 0.8$ ).

| Strain | Genotype                           | % making gut (n) | # of gut nuclei $\pm$ SD (n) |
|--------|------------------------------------|------------------|------------------------------|
| JR1130 | wild type                          | 100% (40)        | 19.7 $\pm$ 0.8 (40)          |
| MS2046 | <i>elt-3(gk121)</i>                | 100% (40)        | 20.0 $\pm$ 0.5 (40)          |
| JR2719 | <i>end-1(ok558)</i>                | 100% (40)        | 19.9 $\pm$ 0.6 (40)          |
| MS2048 | <i>end-1(ok558); elt-3(gk121)</i>  | 100% (130)       | 19.8 $\pm$ 0.6 (30)          |
| MS2041 | <i>end-3(ok1448)</i>               | 95.5% (201)      | 17.8 $\pm$ 5.3 (192)         |
| MS2042 | <i>end-3(ok1448); elt-3(gk121)</i> | 95.0% (161)      | 18.1 $\pm$ 5.6 (153)         |
| MS2049 | <i>elt-7(tm840); elt-3(gk121)</i>  | 100% (104)       | 20.0 $\pm$ 0.6 (30)          |

**Table S3.** Nematode strains used in this work

| <i>C. elegans</i> strains |                                                                                                                                                                                                                    |
|---------------------------|--------------------------------------------------------------------------------------------------------------------------------------------------------------------------------------------------------------------|
| Strain Designation        | Description                                                                                                                                                                                                        |
| JR1130                    | <i>wls84 [elt-2::NLS::GFP::lacZ, rol-6D] X</i>                                                                                                                                                                     |
| JR2719                    | <i>end-1(ok558) V; wls84 [elt-2::NLS::GFP::lacZ, rol-6D] X</i>                                                                                                                                                     |
| MS2041                    | <i>end-3(ok1448) V; wls84 [elt-2::NLS::GFP::lacZ, rol-6D] X</i>                                                                                                                                                    |
| MS2042                    | <i>end-3(ok1448) V; elt-3(gk121) wls84 [elt-2::NLS::GFP::lacZ, rol-6D] X</i>                                                                                                                                       |
| MS2046                    | <i>elt-3(gk121) wls84 [elt-2::NLS::GFP::lacZ, rol-6D] X</i>                                                                                                                                                        |
| MS2048                    | <i>end-1(ok558) V; elt-3(gk121) wls84 [elt-2::NLS::GFP::lacZ, rol-6D] X</i>                                                                                                                                        |
| MS2049                    | <i>elt-7(tm840) V; elt-3(gk121) wls84 [elt-2::NLS::GFP::lacZ, rol-6D] X</i>                                                                                                                                        |
| MS2582                    | <i>elt-7(tm840) V; elt-2(ca15) X; irEx798 [pGB598(Can-ELT-2::GFP), pMM809(unc-119::CFP), pDP#MM016B(unc-119(+))]</i>                                                                                               |
| MS2583                    | <i>unc-119(ed4); end-3(ok1448) V; irEx798 [pGB598(Can-elt-2_5kbp_promoter::ELT-2::GFP) + pMM809(unc-119::CFP) + pDP#MM016B(unc-119(+))]</i>                                                                        |
| MS2584                    | <i>unc-119(ed4) III; end-1(ok558) end-3(ok1448) V; irEx498 [pMM768(end-3(+)), pMM824(unc-119::mCherry)]; irEx798 [pGB598(Can-elt-2_5kbp_promoter::ELT-2::GFP) + pMM809(unc-119::CFP) + pDP#MM016B(unc-119(+))]</i> |
| MS2606                    | <i>unc-119(ed4) III; him-8(e1489) IV; elt-7(tm840) end-1(ok558) end-3(ok1448) V; irEx804 [pGB612(end-3::END-3upstream::CanELT-3DBD::CFP) + pDP#MM016B(unc-119(+)) + pMM531(unc-119::YFP)]</i>                      |
| MS2612                    | <i>elt-2(ca15) X; elt-7(tm840) III; irEx803 [pGB608(Can-elt-2_3kbp_promoter::ELT-2::GFP), pDP#MM016B(unc-119(+))]; irEx808 [pGB619(hsp16-41::CanELT-3B::CFP) + rol-6D]</i>                                         |
| MS2617                    | <i>elt-2(ca15) X; elt-7(tm840) III; irEx803 [pGB608(Can-elt-2_3kbp_promoter::ELT-2::GFP), pDP#MM016B(unc-119(+))]; irEx809 [pGB620(hsp16-41::CanELT-3A::CFP) + rol-6D]</i>                                         |
| MS2625                    | <i>elt-7(tm840) end-1(ok558) end-3(ok1448) V; irEx814 [pGB618(Cel-end-3::Can-ELT-3B::CFP) + pMM824(unc-119::mCherry)]</i>                                                                                          |
| MS2629                    | <i>elt-7(tm840) end-1(ok558) end-3(ok1448) V; elt-2(ca15) X; irEx813 [pGB608(Can-elt-2_3kbp_promoter::Can-ELT-2::GFP) + pGB618(Cel-end-3::Can-ELT-3B::CFP) + pMM824(unc-119::mCherry)]</i>                         |
| MS2636                    | <i>elt-7(tm840) end-1(ok558) end-3(ok1448) V; irEx798 [pGB598(Can-elt-2_5kbp_promoter::ELT-2::GFP) + pMM809(unc-119::CFP) + pMM016B]; irEx814 [pGB618(Cel-end-3::Can-ELT-3B::CFP) + pMM824(unc-119::mCherry)]</i>  |
| N2                        | <i>C. elegans</i> reference strain                                                                                                                                                                                 |
| Other species             |                                                                                                                                                                                                                    |
| Strain Designation        | Description                                                                                                                                                                                                        |
| EG4788                    | <i>C. portoensis</i> reference strain                                                                                                                                                                              |
| JU1667                    | <i>C. monodelphis</i> reference strain                                                                                                                                                                             |
| MS2628                    | <i>C. angaria elt-3(ir79)/+ X</i>                                                                                                                                                                                  |
| PS1010                    | <i>C. angaria</i> reference strain                                                                                                                                                                                 |
| RGD1                      | <i>C. angaria</i> wild isolate                                                                                                                                                                                     |



## References

- Koh, K. and Rothman, J. H.** (2001). ELT-5 and ELT-6 are required continuously to regulate epidermal seam cell differentiation and cell fusion in *C. elegans*. *Development* **128**, 2867-2880.
- McGhee, J.D., Sleumer, M.C., Bilenky, M., Wong, K., McKay, S.J., Goszczynski, B., Tian, H., Krich, N.D., Khattra, J., Holt, R.A., et al.** (2007). The ELT-2 GATA-factor and the global regulation of transcription in the *C. elegans* intestine. *Dev. Biol.* **302**, 627-645.
- Owraghi, M., Broitman-Maduro, G., Luu, T., Roberson, H., Maduro, M.F.** (2010). Roles of the Wnt effector POP-1/TCF in the *C. elegans* endomesoderm specification gene network. *Dev. Biol.* **340**, 209-221.
- Page, B. D., Zhang, W., Steward, K., Blumenthal, T. and Priess, J. R.** (1997). ELT-1, a GATA-like transcription factor, is required for epidermal cell fates in *Caenorhabditis elegans* embryos. *Genes Dev.* **11**, 1651-1661.

## Supplementary Materials and Methods:

- 1) gene models - sequences and coding DNA sequences (CDSs)
- 2) RNAi clone information
- 3) plasmid maps and cloning information
- 4) smiFISH probesets
- 5) CRISPR/Cas9 PCR primers and sequence of *ir79* allele

### 1) GENE MODELS:

*Can-eft-3 (eef1A.1)*

join(2248..2391,2447..>3436,3494..3760)

```
gatgttggaaatagtgcggaaacgggtgatgacgtagagaaaactgtagtcttacgatagcattacattttgcggcacaggaattgggc
taatccggaaaaaaatataatagaatttcaagatggttctatccagtcacgtaccatcgactatttaggattcatatgaaaaatgac
ctttctgaatcagcctagatgttcgagttccaatcatgaaattccagacctggaaattatgaggttcagaagttatattcgaatgaaatt
tgcaatcccattttgtagtgggtgttcttgaactttgttaggaaaaagattctccaagtctgcactaaattcaaatgcaatttccaga
tggtcagattctacggcgcaatgttctggaaggagatgtgtgattgtatggaagtaattggacacgctactcgacaaattctatcgaca
agcatacaaattaggcaaaaagataaccagaagcgtttatcagcaaaatgctgtgtcagtcacgaaggattgaatttcatgaaagaa
caattgaattgattcatcgcgatgtgaaaccatcgaatatttattgaataggcatggtaagtgaaaattgcgattttggtatctctggac
attgacaaatagtttagcaaaagggtcggtatatacgagagaatttctataaaaaaagaaacgatttcagacagttcaagcgggtgtaa
gccttatatgccaccagagcgaattgatggcgagacaaaaactgcatatgatgttcgagctgatgtatggagcttgggaataactatca
ttgaaattgctactggaacacaccctacgcaaaatggaaaacaccatttgatcaattgaaacaagtggttcgagagccccctccaa
aactccaatgaatgaaggttcagtgaaagaatgccaattattgttcaaagatggtgggtagttgtttgctcattaaaataattgaactg
ggatttcaactcaaaatgaaaacgctactcaaaaaacagaaattaaaaatagaacttactgcagcctcgaaaaggattataacaatc
gacaaaaatatacccgaacttctgcatgaaattattgaagcggcgagaaatgacaagcaattcagtatgagtcgatttataatgag
gtagacaacaagaaaaaatgaaatgtgaaataatttctatcataatattttatagattctcgacatgtaaaatctcatcaatcgaaca
tcagtttccacgtgtattgcaattgaacaaaatacctaatacccagttttatctagaaattttgaaatttaataatagtaggcatctttttt
gactatcattgttctatttctttttatctttatgcttcaatttcagttgctcccttttagtcattcctattgattttgttgttcttagatct
gtgccatcgtttattgaactaaactgaagatacatttccaatgtgatcagaaaaaatagatttctgaattatataatataatattttat
tctttttctcatatattttatcttgccattgagcaattattcgatttctttatctctcctttttctcctttttcgcacacgaaatttaacatttctca
tcgacttgttcaaaatcataatcatttttaattttcttcttcttcaagttctcatttgaggtagatttccctgtgaataaatgaataaata
aataatctgtggtttgtgtgtctacacgctcccttttctttgattatcgttttttttgtctttatcaaaaatattggttctgcgctcgtaaaca
agcttcaaaaaaaaacgagggcgagaggagagaaaaacacagattacgcacacaggggccaagaaatagtagtgaacaaga
aagcgagaacctggcgagatagtggtgttagagataaaaaagatgaaggcgcattgatttttgcggcgctgtgtcgggtggcgctc
cctttgctgatgtggacgcttcaattttataatcacaattgtggcctaaatttttaggagagctgtcattcttcttcttttctgttctgttc
acacgatttctgaatttttctgatttttctgaaaaatcttctcctaaatattttacagtgaaataaccctcaagcttcaataatgggaaa
ggaaaagggtccatattaacattgtcgtcatcggacacgctcgactccgaaagtccaccaccactggacactgatctacaagtgagg
aggaatcgacaagcgtaccatcgaaaagttcgagaaggaagctcaagaagtgagtttaatttcagctggaataatttctgaaattca
atataatttttttagatgggaaaagggtcgttcaagtagcctgggttcttgacaaactcaaggctgaacgtgaacgtggatcaccattg
atcgcgtctctggaagttcgaaactccaagtagctacatcaccattattgatgctccaggacatcgtgatttcaagaacatgatcac
cggaactccaagctgattgcgcccgttggctgctgcttgcggtaccggagaattcgaagccggaatctccaagaacggacaac
ccgtgaacacgctcttctcgcccaactcttgggtgcaagcaattgatcgttgcctgcaacaagatggactccaccgagccaccattctc
```

tgaggcccgtttaccgaaatcaccaacgaagtctccggattcatcaagaagatcggatacaatccaaaggctgtccattcgttccaa  
tctcaggattcaacggagacaacatgctcgaagttcatccaacatgcatggttcaagggatgggctgtgaacgcaaggaaggaa  
atgccaccggaagacccttctcggaggtttggacgccatcatcccaccacaacgtccaactgaccgaccactccgttccactcca  
agacgtctacaagatcggaggtatcggaaactgtcccagtcggacgtgtcgaaccggagtcacagccaggaatggtcgtcacctt  
cgccccacaaaacgtcaccactgaagtcaaatccgtcgaatgcaccacgaatcgtcccagaagccgttccaggagacaacgctc  
ggattcaacgtcaagaacgttccgtcaaggacatccgctggtcagctgctgactcgaacaagatccagccaaggaggctc  
gcacctccacgctcaagtcattatcatgaacctccaggacaaatcgccgctggttactccagttctcgattgccacaccgctcac  
atcgcttgcaaatcaacgagctcaaggaaaaggtaattagaaatcagaacaacctcagaatcagagatttaattgttcaatattata  
ggctgatcgtcgtaccggtagaaggtcgaagatttcccaaaattctgaaatctggagatgccggaatcgtcgaactcatccaacc  
aagccactttgcttgaatcgttaccgactacgctccactcggacgtttcgtgttctgacatgagacaaaccgctcgtcgtcggagta  
tcaagtctcgtcagaaaatccgatggatcatcaggaaaggacccaaggccgccccaaaaggccggagccgctcaggaagaag  
aagtaataattgtgattcaatgataactgtattgtattatgattactcctgaaaattatctgtttctgttactccatcccacattgattaa  
taattatctgttttcaatcattgtgccccctttttcttctcgtttatccaatccgtttctttacataacttaacccccatcaattgctggt  
ttcgaacatattttatatacagatcgaactggttgtttctatcctgttaacaaaaattaacaaacccaagttcattctactgtatcct  
gtcttccctgatcatcaccgtcccccaaaaaaaatftttctatgttagaaaatgtgcaacctatgcatatftttgtcaaaaatgaaata  
ataaagtgttgtaaaaaaaatcaatcgttgtttgatcatcaacttggaaatftttgtgtaaacagcatggtctcattttactcgataaga  
taagaagaagaaggctcgtacctcgaatggtttgtttttgtttcgaaaagagcgacaatggtgagagtaaacaaaaatggtatt  
gaaggtcagattgttgaacagtggtgacgatggattgggatactttaaactctcgttattgttgcagatttgcactgtttgtgacaattg  
gaaagaggggttgcggtcaaacatcaatgagtggtttgtttgtctcattttacagacaaatag

*Can-elt-1*

join(5001..5301,5418..>5798,6104..>6264,7235..>7360,7574..>7729,7840..7974)

attcctgtgagtaagccagaaatattttgctttatcagttttggaactttattcattcttccgagggttactgtaagctttgagttgtaacaat  
tgatagttctgactacagaatcttacgattctataagccgagaagcctaaagtcaggtttatctgtcaaaaaattcagattatcgattttc  
aaaatgtatttttaaatcatggttaaaagttgtctcaactctgaaattcagaaatgaaagcagtttcataatacaatcttcaactaa  
caagatatttaataaaaaatcacatctaaagtcagactagcatcttaattcttccggaagcctaatacctaatacctaatacct  
tagcctaactaaaaaaagttacttccagctgtcttaatttggtgcaatcttgataacctcacatcttgatttccacaaaatctaga  
ttcagttgattgaaatcagatcacaagttagtcaagttccgggttttctaattttctccattactgaaatttccagagctcctattttgatgat  
gtcggcgaaaattgcacaaaaaagataattggtgtaacattttttgatctcaaaaaatggacagtgatcccccaatataa  
ttgggtgaaacatacacagagagattttcgatttagattaggacctacaccgtattcggttttgagaaagaaaatccacgtccct  
cgcgactgactcgaaaaacgagcttctcctcatttcttttcttaattgtatttgggtgcgaccaggcggtctcctttttgtcctgc  
gcctcgttgaatacgggtattctgttgtgacggctcatggtatcggctcaaaaaatctacattttgcctcgttttctgtcgcggatgaaa  
aagaatattgtgagaaggaacacacaaaaactttttattcccgaacatttctgaccagattttgctggattttggggaggagggt  
gggatactttttggaatcggaaaccctgaagttgataaaatctaaattgacttgattttttgaaagtctaaagctgagatattccaaaatt  
catagtttaccaaagatctcagaagggcctaataatttttcaatttttaaacctctcactctcccaccttctcccctaaaaaaccaa  
aaaccaataaatcatccaatctcataataatattacataaaaagattaatgttgattacataagactactgtaattttctatgtctcctcattt  
ttcggcagcatgcataatgtttatacaataatataatcatcatgaaactctgaaggctcagatttcccttctttttctttagttccaaa  
actaatcccactgctccaatttcttttcccttcttcttccccaaatfttctggcaaccaaacaaaaagccgcgcgctatttaatga  
attatagatgattatacataaatcagagggggagagcccaagtgaagaacagccgggtgggtgtattttggtggtcagattttatgc  
aaatacaattggtgtgaggattggtgtgatggatggattgagaatgcttgaatgatttataactataatataataagaggatgtgtgga  
aaacagagaaaacaacaacttaattccctattttggatgaaacattgaaataaatttcatgatgtgtagattgattcaaagagaaagtt  
gcgggcgaaaatttgggtgaaaccacgtggcgccgcatatccacacctgccacattggtgtgagaatgctggaattgttttgatg  
atttgcgaaaaaaactcgtctacagtagcatacagatttgaacaaaattaggaatattgatagttttggagggttactgtagatggt  
gataactgaaaagttttgatctacctgaaaatgatcttcttggaaaatgtttcaagagattactgtacctgagaattacgctaactaa  
gacacagtaacttcaaacgagactcgaaaaagtgaagtttcaaacagtagtctcaactatgaatgaaaatttctgagctacag  
agtccaacacattttcaatattcttccccaaatcccataattctctacagtaatccaaaaattcgaacatccaatttctcattcctcc







gtcttgctcgtgtttcaacattggtgctatcttctatataaggatgaacaataggaaaggaaattgtattaatctgaaatctcagaaacc  
gggtgctactgactcaatcttggaaactccaccgaagaaccgactactcctgctgattctcgatgcaatccgctgatggcgaaatgga  
acatctccaggaataaattatattcaaaatgcatctgatttttctctcacaatcattcagaactcatctccactggcaatccgctcat  
caaacaccaacaacaactgcacatgatcgttagttgatttgcgagaaacagaaaaaacatataaaaagcatggtgtgttttgatca  
aagtgaatgatgataaatcttcaagttcagatgtttatctccagtagctacaaccactctcctctccaattagtagacaacaactctct  
ccagttactcaaccttctcaacaacttccacacctttacatccaattgaaccaacacaacattaaaataattattttcaataaagttat  
ttttctgactcattcaaaaaaatgcaaaaaacttccctcaaacccttttctgttcttttttcaaaacaataaaacgatcgaatat  
aatttgtaataaatgtagggcaggcttggcgtcatgatgttactgataaggctacgtactctatattgctggctgtcaaatatgtattat  
acgtgaataaacagaataaattcatttccagactagaaaaacaggaaaaatagaattttgtgaaaaataagataaattttgaaacattta  
tcaaaaagttggtatgattatggtatcgtcagaataatgtgataaataatttatcattgacagagaccgctggttctgataccaattttta  
cagataaagttgtcccacagttttgagtttttgcgaaaaatattgattgacttacttgaactcaatttcaactatcttgcgaatattc  
caccttattgtgagatgtcttattccctggaaaaattgagtagtctagaaaaacatcaaaaattcagatttagaaaatttctaaaagctt  
tcaattttcatttctattagattttttggggacagtttagtttcttatgaaaaacatcagaattttcagtttctcattatccttctctggc  
cctgtaattctcggcattatacaaaaactgtgtatttctggaacaagagaaaaacaattttgaattgttccaaagttcaatcaataaaaatg  
tatcgataagaagaggaaagaaaagataagcggattacagctaaaactataagcctacataataattcagaggtaggaaaaaac  
ggaattttagaatgagaaggtttttagctgactcgagacaatctattttaaaaaattctcaaaacatttactacaataaacagtgaaat  
ctggcttggtttaactcgaattattataggttttttatgaatacagctcaattcgataagaaatctgtgattttgatgttcagggtgtaggtg  
ccaaataatgaataaggtaccagatttgaacaatgattaccaattaaaaccaagaaaagttaaagcttttagggcaggagaac  
agtccaaaataattgttttcaacaaaactaatcttctcaggccaccgttaagttttgagcctaaaagattttttcagctttgttaatttacc  
gacgaatatataaaaaaataattcattatattcagactcactaattcatcagagtttccaaaattctgaaatctggatcagtttttagtgct  
aaccaaaaaaattggatattcatcaaatccaccagtttactaaatcgatctcgtgaacaacgctccgaactgcagattgggataatc  
ataaagctaaaaggaaccaaattaaaaactgattaagaaatcatagaagataatgcttgaatggaagaaacaaccaaaaa  
ggttttagaattctaacagaagaaataaaaaatcagacctcaactcagttttatattgaaaagataatgttatctttaaattgatatttcta  
ttcatctgaaccatataagacaatcaattgtgttttattgataaaaatattgcttttttaattgaaaatgttccgaatgtcccctataattca  
gcattcccattttgcttccccacattgtatgataaagtcgatgaagaaaaagttgaccggcatcatataggcaactgataagaat  
accgtatacttcatgcacatcaactttttgttccacgacaatgcacattggaccttgaatcatacaaaaaatgagaaataatttcgag  
aacaggatttcgaaaattagagaaaaatagaatgaaattatgatgtgaaataatgttgcgaaaaaacgattaaaaatataattgatta  
cgttatcgaataactggagtgattatcaactgtagagtcgctgatataaaaagggtgctcagttcaacatatcgctatcactgga  
acataaaactcaaaaactgataataagttttcgtagttcatttcatgtcataagaaatgaatcaagtttccagtgctatgatgaatc  
gttaccagaatgaagaattttggtgaaaatttttagtgagaaatcataggttaggaaacattgttcaacggtaactcttgttggcacttt  
gttgaatctgaaaattatgactggaaaactgaaggctaagctccaaaaacaatctcattgataatttcatgtattttccaaaaata  
acttttttcagaaaattcataggagttgagagaatcagttcaatcatatcacaactccataatcgaaaatcaactcgaattaaaatt  
attttctcaaaagctcgggaaaattcccaaccctttttccagagccaatcaacaacgtttgcagctacagtaccaactcgcgacta  
gaaaaggccatataaggagaggggaaagagcactatttcccttttctcatttctcatttccaatgtgtgcggggctcataatgactgat  
aagataacgacagaatattggcgttgggaagacagttgatggcttgagcatattcttctttttgtcggatctcctaacgaatatctgaatt  
tctctatttttcataatctattcgaagttctttttttcagaaaaatggatccaagatattcgatcgagagtcctggatcgatagtagcgt  
ccaccaacattgcaactcccaatccaacaaactcaaacacatactcttatgcctgatgatggcagagttcgatgagtgaaactaacta  
gaggtagtatttctgatgttcttttacaacattaattttttcagttcgaactgatcctttgatggataggcaaggtttatcggctcattt  
gattacaatgtaagtttgcactaatagaaaaataatgactgatcttcttttccagcaacttccgaaactggaacaaatcaagattatt  
tgtataacacttctcaatttttaacacatattcaactcaaccgctccatcacaataatcactttatcatcatcgaagttggccgggaaat  
tttgaattcttgaatgttctgatttcaacaataagaaaaatatttcaagacatcaaaactccaatttttaacagattttacgataattcggcattta  
taccacaacaaccttctcgcgccagcaaatccagaatgtgtcaaatgcgcaaatccagtcatttccggaagacaagttgatggtggata  
tatgttgatactttagtaattctaattgtatattgattgtcacgaattcaacaaaactattcgatgccacttctctgttcaaccaattgaacc  
tgctccaattgaacaaattccacctccagcaccagcaccatcaaaaccacaaaatcatcaagtaacaaaaaagctggatcagctg  
gaagcacaatcgccgacaaggattggtttgtcaaattgtaattggtacaaatactacactttggagaagaaatgtcgaagggtgaacc  
agtttgaagtgagttattcaaattttaattggaatatcagaaatgtgaaagcttatttccagcgcagttgttctgtatttcaaatgcatag  
tataaatcggccagtgcaatgaaaaaagagggacaacttcaacaagaaaaaggtattttttcaaatgaaaacattgaaacaact



tgaaaaattatagaaaaatgaagaatagtgatcatcaatgactccgacacgaccaaaagagcgtaaatatgaaaaacgaacaa  
aacagaaaactgaatatcaagcaaacgcatttgcttgaatgctcatcaacaaagccaaaatccttatagtaattcacattcgc  
atccagtgaaccattgcattatacaggtgagatcattcgcgaagtttatttcaaaatttttaaataatatacgttccagaaccatcgttag  
cttcatttcatatccacaatattcatcagaaatgaaaccaactattcaaatgatcaatcaagatgaagaagttaaagcagctgcgaga  
gatctggaagaggaacaataattcaactattttcaataatttgctctgatttacggcgtattttacccttttcatccatctcaaataggata  
tgtaaagatttgatacatatttttttgcataataactcaataaatttatattcatattgtagtttaatgctttcagaaaaaacacattc  
ctgtgaaatataaattacagtagcatttccgaagttgcaagatgagcattctgggtaattgtgaaacacaacaaaaagaaataat  
cggaatcaagaatgaatggaatcagaatctcggcattccgaaaccgatgggttttcggaatgagactaacgctggaacacattccg  
aaactttcgaataatctgaatgtttcatcgacctttaaggtttaattaaaaatagtgaaatttcaataaattatgaaaaagtgatgaat  
tattacccaaaaaatcatcctataatttcaataaaaaaatgtttcc

### Can-elt-3

'a' isoform: join(9306..9424,10061..>10331,10439..>10533,10581..10713)

'b' isoform:

join(7159..7247,7294..>7442,8921..>9136,9319..>9424,10061..>10331,10439..>10533,10581..  
10713)

tctacagtttctagaagagttcgttgaagagatagatttctcaaaattccaaccaataggtcatagtcggtcgcattactctgaaattag  
gtaatgttgatgggtgagatgaaaataattttctggaaatgtttccctatttcaaaataaccgtttgacctcatccaatgcaagattca  
aatcgattgtattttaccaggtcatttttgagcgaaaaaatgaaattgtttatcaaatcattatttttgaattaacatagtttgagtata  
attatcacaaaaactagaaattctatatattttcgaaaaaatgggtgatgacctcatccagtgcaagatacaaatcgattgtattttac  
accgggtcattcttgagcaaaattgaattattatcaaatcattattatctcctaattaacatagtttgagtataattatcacaaaaacta  
gaaattctgaaattttcgaaaaaatgggtgatgacctcatcgagtgcaagattcaaatcgattgtattttaccgggtcatttttgag  
caagaaatataaattgtttatcaaatcattatatactgtgaattaacaaagtttgagtataattatcacaaaaactcacaatccagattt  
ccaatcggtaaaagaataactactaactcgtcctagtcattatcaatatactctctcatgctttgtgaatcaataagaacatcagcacga  
taatcaggctgattcaaagcaccaacaagttctgaaaaatgttcttatcttaacaaaaacatttcaaaactacctctttgcagtg  
gtattgggacagatctcgagcgcagtgatttctggaatgtttttaaattagaaaaatgaatttagtaataaagaaaaagacatac  
cttttcagtgatcagattcacataggcacatggaaccatccagtcacacccatccatctgtgttgag  
tgatttgataatcattttatcaaaactcaactgaaaattcgaacaaaattacataataaactcaaaaaataccacctcgtcattatt  
cgttccctcaaatgtgattggcagcgcagtcattggagatccagaatctgaagttccattttgcaaaaatggaacttttcaagat  
acaattgttgctagagagacagagacaaacaagaaatggggcagagacgcagcgcctctcatattttatgattggggcgtc  
atttctcctgtcccttttattcattgtttgcaactctctattttccattatatttctcatagttatttgaaataagttattccttctg  
caatccaattatttctgatacaaaaaattatatttgaaaaaacgataaatttcaggtaaatggaatgagatcattagc  
gaatggaagtttgccgcatcatttagatcagtggaagaaggtggaagaacgtgtgcaatggtctccgtagttccaccaacgt  
gaggatgctggaagtgagattgtatattgagagtagaaacagtaagattccgagaatttcagattccaacatataaaagcattg  
cgacacgagaatttgccaatattggatctttcagatgctctttagggtgttttcaaaggggaatattcaagaattttatgtaaaaaaa  
ttgattgattcgaaaattatgcaattctactttcctcactcagagattataaaacattttttccagcaaaaaacttggttatcattgat  
ctgaacatcattatcaactgcaacaactttgtaaaaaatacaaatctcagtgagatctccccactttctcttttcaacaactttct  
cattttcttttcagatctttggaagtattgattatctttcaaaatagcaaaaaggttggaatattctatgaacaaggatattgtcacggca  
atttgatattcaaatattgaagttttcaataaaacctatcaaaattcgtttggcaagctatgccttatcgaagttagaatcaacat  
atcttatcaattcaattggttatcaaaaactttcagatatttgacagatttcggtgaagattccgaatcattattatcaattcgcatattgtc  
agctccagaaatatttagtggttcagctcggaaaaatcagatgtttggtcatttggtatggtgtcaacaatgtatacaaaaaact  
gttagtgattattggtctggtccacaattatttcgattatcgagaatgctgtaaacgatagggttttctggtcataaaataatgtcatcaa  
aattgtttttatagagaatgtaactcaggtttgtcaatacacttcaaaaaacaactgattatgagaaaaatgatacgggtataattttgt  
ttgttttttttagaaaaaaaacttcaattccagctcgaaaaaatattatcaatgtaacgcttccatcaaaagagaccaaca  
atcacagaaatattgaaagatctgaacctgaatgattctgaaattgaagattttgaatgtatagataaaatgctgttcgagaagagatt  
caggagagaatgaacacggaaaaatgtttattttatcggaatgccaattgaagacgcggtttttcttgaaaaatgagtgagcaagtt

gtgaaagtattatgattcgaaaaggtgtatacaactcgagcaccggttcaactgtccaaggtaccacttttcagggaggactaag  
gttttgatgaggaaatgaaatgcaaagttggatttggattcctcaaaacgtcagattttgaaaaataattatcacggaaaatatttttattt  
cagctcggatgacgaagatttggttttcgaaacgaggaaagtcgtcaatttcagtttgacgattgtctgttattctgccagacgacaa  
acttctagagaaaatcaagttgaaaataaccgatgacataagaccaatattttgcccagaatcactgattcaacagaagataat  
tattgacagaaaaacatcttcgtaactgtgtatcaaggaaaaagatgtgaagatcaggtaaaaaatgattatttttgcaatctcatac  
atttattctcaggcgcagagaatgtcaattttgaggcatttagtgattgcatacaattgacggatggaagagttattgcgaaaagag  
gctgttagatattccaccagtttgagatcaagagttggagatcttcttcctcatgtggaggatgaagattgtttgattttataattggat  
actctgcaccacatactagtgtacagcgttggatgtatccaagatgtcatcaggtagatgtgaaggattttcagaaaaagttt  
ctaaagatgtagaacacgctttctgaaaaaaaatcgataggaaaagatctttatagaaaaatttaatttctcgcatttaaatcaaca  
acattttccagtacgaagatgatgacatcaccagcagcccattctagttacgacgaattctaaaagcttggctgtatcaaacacaa  
attatgtttattggcaaggatgtgacagtttagctgccccatttctacttaactcaatgatcctcgtgagttttttctagatattgaaatata  
gatttcaaaaaattcagagattgtcttccgtgctaaacgagtttacaatcgatacttttcaatttttctacgcgataactctgctatca  
ttcaaggatgattgatcaataaattgtcttcaatcattttttctcaccaccctacaattcgttttcatttcagaatatctgcccgtttc  
aatcacttactgcatatgtcgtatgcccaattatatacacatttagcagatctcgggttttcccggaattgtatgagattccgtggttttgaca  
tgtttgctcagcttttaccatgataaattgtatcacgtttggattatgttctactcatgatacatcatttccactgatggttgattggctgt  
gatgaaacagttgagaccaagattgattgattcgtcgttcaatgatgctattttattgtttagtgtatctaccaggtaaacatttttcttcaag  
cattgttcagaactgtgtagattactggttaagacctccccatttcaaaaaaagatcattcataaaaaactttaaactggtcttgaga  
atttttagtattatctatgacgatttattatcactattaccaatactcaagattgtttttttaaactatcaaacatatgtgaagcgtgtttc  
aatgaaacaaatctggaatctatgaaaggttcaaaaccataactttttacgtcaatttttcaagtaacaactgaattctacagaaa  
tcagaccaattgatctagggaaaaaatctagtttaggaatgtaactctgtaagaaaaatgttcagctcaatttttaagccccctttcaca  
gcctcaaaattttgcttttcaaacagacaatcagcaatagattttcagacagtttttttcaaacatttttcttaaattctgataagatta  
tttagcttctcataagagacaaagagaaaattgtagtctgaaaaaccctgataaaaattcgaacgtttttttctaaaaaaattgtttga  
acaaatgtatgtaaataaaaaatgaaaaaggaaaagtacaacattttcagatttaccatcgataaaactcatcgaaaatgctgt  
gtattatcaaaaccattccaccaagttgcacttttcgagttcacgatagccatggaaggtaaacattttttataattttcaataaataat  
taaataattttccagccacatattccgacgccttataattgaatcgagaaatctccccattcaccgtgtgtaactcaagagctcaatt  
gtcccagaatgtcaaaagatgagttctgttggcgtgtacaccagcaagatgtgtgtattgatatcagggtcaagcatggagtaagatct  
tttcttttttagagtaatagcaataataataaattgaggagataatataatgtgaacaaagagaattgtactttatcattgatgagca  
aaaatgacaacatgtggagggtacttaggtcaaaagtttgtgtcgtgtttttttgtttgcccataaccgcacaaaaatgtgtataacca  
caaaatgatgataagaacatcggaggaaaaatctttttgaaaaaaaacacaaggaaatatttttatttttgaacaaactg  
aaacttttgaagatcaaatcaactgttaacaaagtacaaaagactaacgatctgagaaaacaatttcagattgattctagtatttc  
tagaactttataagtttcaaatctgaaaatgttattatcatttcaattttgcccattttgttcaaaaatgttccatattctggaaaaaactta  
aaaaaagattcaagatttcttgaactataaaattcctattcagctcaaccgtggatgcttattcgtatcgatacattacggaacattg  
aagatgacacatttaaaaatgtaatgaacgcttcaaaattgcacaagaaaactgccatccaattgtgtggttggggaaaagactttg  
cggccgctgtaagggtgagacacttttgttgaacgatgtttctcgaagaataacatttcaattttagttctccggaaaactcgtgttcaa  
tcaatcaacggggtttgtattctcgacgggtttgaaaatattcgagatgatcgtctctcatcactattgggcattttaaattatcgagtt  
ataattcattttttcagcgcaggtattgtttccccacgggtttttcagcattctgtgattttactacttttactaccattttgccaccaa  
ataaaaaattacactttttactacgcagttttgtgtgtttgtaagtttgcaagatgctgctacgaattaaaaagattattatgattatatt  
gaatcaaaaatgttctgtgtaaacgaaagagagacacagcaacaactggaaggttttcgggaagatttatggggagaaaagttt  
ggaaaccggattggagagacaaatacacgcacccccgaacatacgtatctccacctaattcaattgagagaaaaaacattgtt  
acctaaaaatagtagatgaaaatcaactagaacgcaactcaaaactcctggttcacagaaaaaacatgcctctacaatcaacg  
caacacacaacgataaaatggtcagatgaactttttcagaaaaataatgtctttatgttttttcaataactgccccaaaaatactcgc  
ctctttttctatcaattttttgctgggtgtctcaacaaaaattgtgaaccgaaaacgaatgtcaatcaagctttttctttaaactttcgggt  
gtgtgctttcccaaaatgctattttccttgatgattcaaaaataagttgcccgtttccagaagggtggaagaaaaagcgggtgcctttttc  
aattatcaactagagaacttgggaagtggcggagctgtgtagctcacttgcctcctgggaaggtagcagactatataatagtcagc  
caattcattacctccctttcattaaaaataatctaaataattttttgttgatgatagataaatttttttagtattgttttactgactgtttgag  
gtctgctcaaaaaacaacaaactgtttttctcattttgttaccttttcgaaatcgatcgtttattatcagttgtttttcagacactaacaaca  
aatgaataactcaagtcctcctcgggattcaaacctactaccaaaactcaccgattcaagcactgatacatcactcagtggttaagtta

ctgtaacttttctcagataatttaaatgttctataaaatfaagatagcatgatgaatacaccaattccaagtatacatattcgccagcaaat  
tatcatcatcttcatcatcaacaaaatcagaatcacaatcaaagtcagaatcataatcaagtgcaaaattatcaagatcatcaattgag  
caacagatcaaggtaaattttaaataatagtttttgaaaactgttcaaatgttatttatcatcattacaattttgatcgattgtcgaaaa  
aatagacaaaaaacacacaaaaattctacttctcttggcattttctgtgtattgtcatcgttcttcttctcgtcaaaaatattgttctt  
ttgtcaatttttgagaaaaaatatgtaattccaattttgttcttcaaatgtgtgttcttctgaaaagagagacacagaagacagtaaatgtt  
ttcacggtcatttctctatcacaacttaatcattttcactcaccgtttcttctcgtattttgtgtaagaaaaaatagaagaaagacaaa  
aaagaagagaagactatttagaagaagaagaaggagaaaaagaagatcggaattggacggacattgtcgggtcgccaattgt  
aaccgctccacacagtggccgcaatgttgttactgtgtattcccccatatcttttccattcaatcgttcttcttcttctcgtatatac  
actgatataggggaatggaatgatttttccatccttgcgtcactttcgtcactttgttccaactattttattgttacgattttatgctgcct  
ttttaaataccaaaagtttctcagattfaatttgaaggcaataataagaaaaaatctgtcgagctgcactttacacttttccggtcc  
cccccaatttttcttgcacaaaaatgaacaattttatttttgaaaaaatggaactgtattgattctcgattcgacttttagttttttattgt  
tggtagaaaattgatttttaggttaggtatgttaggtaacacttctctctcttcttcaattttctcttcatgttgattgtgctccggcc  
gattggtcgagaatggggcgccgcaacacaagttgctggccactctactaccgtagtaataactgccaatcacggggcattgtctt  
attcggctttttcgatttttctcgtatttcttctgaaaaaaaacattattctcaaaactctcctagtcattgtgtcaacaatgaaactct  
cgttttttccaacacaaaaattctaccatatttgcatttgcacatccattacatcgtctccttctttagcacaccgttttttagcattggc  
atttttatacgttttttttggagaaaagaaaggtgtgcattttccagctgtttttagaacggtattttgaattccatcaaaaatttttattgaatt  
tgttagaaatttacaataattttactgaagattctgacacctttctaccctttttagagccatgaattcagaattttgaattaaaaattctcaag  
ttcaacatttcaaaaataaaaaaaattgcagaatcatcaccaccaagggcgagccacacatcaactaccaccacaattc  
gagccaacaaatagttcaaatcacgagcttatttgcataatccatcaacaacggagacaatacaagctccggttactgtcgctct  
gctgctcccctccagctatcgctcatttaatgaaggaagttcagatcaaaagaggatttaacgaatattatggtaagttttcttttctcgt  
accctataattttatttttattaaattattatataaaactgtatacaatctgaccttctcaccaccacaggaagaaagatctttatcgtcttttttct  
ttccgcaacaaaaagaagatattcaattcattcctatacataatattgtattttagcgtcccaatccatcaatgaacgactatcgcgttg  
aaaagattgccaatccggtggctgacctatattcaaatgagcaaccaatttataaccgattttgcaaatgctgaagtgaactttgttca  
tttcttaacaatgtctataggggggagggggattcgacaatacacaatcattatcaaggcaacttctatcatcaatcactcttttttctaat  
tgttaataagatgattgaagaatttgaatatggaaaaaacctgggtggaattgagaagccaagagatcaattttattggattgaa  
aaaagagagtggtggatggttaaaaaagagaaaaattagaacttttaagccaaaattcgttatggttttagaaaactggaattaaa  
aatagtgatttaagtgattatgacaagcagctaaattgatgatagagagcttttagcacttttcttctgaataacttcaaaactttcaaa  
aaaaaactttcattgaataactcatgttccagaattttatgaacacatttctgagtaacaaatagaactatttcaaaattagagtagag  
ccaactttttcagatggttcaaaaatcgaaaagtgatagttattttaaattttaaactctagttcacaattttgactgtaactgaaaacc  
agagttccattatcacaacattgttctatctcaaaagtaaccctcaattttttagtccgatgctcaatcaacaagatgctaaacc  
gatgaatttctccaccaactacatgggagccacacaatttctccaccaacagactgtgcaactcaattgtctagatctcagcggctctc  
cacattcaactcgtgtgatccagctctaccattaatgcaccagtcaccttctcaacaaaattatgtgatgccacattcaactttacaccac  
ctccacaagatccattggtcgtgaacaaaaccactgtcaaaaagcgaatggctgtaagtttttttttttgaaaaacgggtttatt  
gattttctgttgacagaaaacagtgattcagaaaaacaagagttctaatttctcattttcaggccgtgcaatgtcatcaaaaattcaat  
ttgctcaaaactgcaagacacgtgaaactacactttggcgacgaaatggggaaggaggtgttgagtcaagtaagttgttcaactcgaa  
aaaaaaaattaacaaatttttgcagcgttgcaattgtatttccgcaaaaacaatcgaaaaaggccgtgtcattgagaaaagatg  
gaataatgaaacgaaatcgtcgtccaagaaacgaatcaccaaatgggatcagaagacaagccacatgctaaactccccgtttccc  
aaaaacaaaatattgctgatattcaaacagaatttgtttgtgatttttcttcttaaaaaagtttgcccgacatgtacagatgatttctc  
atttatttttagtatctatagtcgttgctgacatttccgccccgaaaaatgtctggtgttttacagctcctcaaaaatgttttctattc  
atagatcatcaaaatgccatttctgatcttcaaaaatactttttgtcatttcttaattaattgttttctgctcacctacttcaaaaattc  
ccaaaaccattcccaagatgtttttctcccaattttgttacaatatttccatgactgcaaatatttttgtttgctgaaaaattgctattg  
ttgtgattttactggtatgttttttccgttttccctaaaattgtttccagcattaaccatttttctgtcacataatttaacatatcaacataat  
cccattaggcataaacatataattttccaaaatattgaaataaattgaaaactttgttcattttttgttttttctcgttgatcacaacaaaac  
ggttgtatcaataagcgttttaacgatcttttctgttgcattttgttggatattgtgatcgggtcataaagtggtcaaacacaaaaatga  
tagattatgggtgatatttccaaagattttgttgaagtttgaacacaaattgagagattttgctatcgtattcgatgaacgattttgattgat  
tgaacagaaaagttcagggtagtggtgagataatgtttgaaactcgcgatgtatttctggttccggattctataggaaatttattcagac  
ctattcctaacattgttattcacttttctgacataaatcaaatgaaacttatttataccaacaagaaataaatcccaagttgagcttct

gaaaaaactcggtttatgaacaaataaaaactcatgaggagatatgaaaaacccggagaaaatggtgagtgaaacatttcttcata  
agaattctcgttaagttgagtgaaaattgaaaaataatgaaaaacttgggctccatcagatcagtcagattcttctgtatgattt  
agttattatgtacaactaaaatcttaacggtattgttcaaatccatttctgactgtaattttttgacatgaacgaagaaaatttagataa  
aattagagtccaattcaataattgtaaattttacataatgtcaaaaacctttaaattatgaaacacacttttttgcagaaaaccgtatttt  
tttaactccaacacgcgagatatcgaataattgtgatgaggagtataattcctatttgaataacgcttccacccccctctctctctctc  
tctatcaciaaattctctctcattctccacacttctcatctctctgtacaatctgtaacctaacacttttctctcataactcataagtttgtttct  
cgtcatctaacgagtttctaactgtttgtcttattttatgatgcgatgatggttttatgaaaaagggtcgaaaaattcaatctctgtgaagctt  
ctaaaaaaacttcaggattcttattctctcgatattttgaaactgccaagtgctctacttttctcaattagctcttccaaaaatgtaa  
tattgcagattgccacaacaattttcagtgtaaaagttaaagttgatcgatgctcagcttggcgtaagttctcataatggtggaagat  
tcaatccttacctaaatgatttctcctcaggcaacaacaactgtcacgaacaagacggttcggaaaaccgtccaatgaaagtttga  
aaatggccacagtgaaacagattgggatactcgttcaattccgatgttctctgcatgtaagttgtgaataactacaaaaactaaca  
tattttatagtaactaccggttcaaagaggggacggccgacgatccgattgttaaagtgatgactcagtgagtgataataaacataact  
tataaggttattgaagtaaaacccccattaaaaataaaaaatcttattcactcattgtaaaaatgtagagaaatgtcaagaagtgct  
gagaaacctctctttgtgagttttcggcatttctcgacacacctgaatatgatattttgttttg

*Can-elt-5*

join(3182..3683,3753..>3853,4391..>4654,6982..>7053,7108..7263)

ttatataatatacatattttctcgagctcattcattttcattattttcattactcatagccgctgggcatctttcgtgtttgttccaatcggctt  
catcttttcatatcagttgggaaatttgaaaattaattatgaaaaattcaactctcaggcttagagaatttttaagcccgaaaatttct  
atctaaagtttttattgggtgataagcctgaattttgcctaagttttgaaaacaagcctttatctgaattgggatcggacctgtttatcagga  
agtctcatccaaaacaggcctaaataaataaggcttaacaaactaactagcctctaggcgtgatccttgacacctagaatgtctag  
gcgcggtacttaataactaggctctcaagacgcggatcctgtcagaggggatctctagactcgggtcctagacaattaggttatctag  
gctcgggggcttaacaaccggcttactagacttggctactagtcacgggagctctaaggttcatgagttaaaatttcaaatttttaa  
cttctctgaactttattgagctccatgcaccccccccccaataatttcaaccgattttctccaaatcacatgaccttccataataaccta  
attgtcgtcgccacaaaaactcccacaaagagcctcaacaattgtgtgtcgatttttaacaaaacgtgaacaatagtcgcctggggtt  
acggctgatagaatatttaagagtggtggccagagcgggcacccattattatctcgaggttcttctcgtctgccagcatccgggtt  
tgcttttctgtttcatgctctcgaagaaaagggtttgttggtgcagaaaattttatctatgacatagaacacaaatgcgctccaac  
gagaaagataatttccagtgaaattcaaaaaatcattttttttgttctctacacctctcctctctcatcagattgcatttactaagaaa  
tgtgtgaagactaaaaacaacatcacaaaaggcgggaagatgagattggcagggttaagggtgtaaaaaacgaacagattgtg  
gatacttattgttagttattattgattggggattttctgtatgttcgtaatttgggaagattagtgggcaagggttagccaatcattgtcttt  
tcatcatttattcacatcattttattatgtttggttagacatcattttctgcatttttaactglatttttctgtagcttttaagaaaattgaagca  
tctgaaaaacagcggcctgagtgagcagtggttctgtgtggcgcgcaaggcgcgagttcgatccccgacctcaaaactt  
tttcttccatcattttcgcctatcctctatcctatcgacaatctaatctcatcacactcaccattcacattcacgatatttttctgacagtaatt  
cctgtcatataagatgcggattatctctctctcgttattttcgcgcaggtgtgatattatgataatgagagcgttggaggatttacgag  
gagaaaattgcatttttagggggcctatttggttacgaccatctagatattgttgggacaagttcagaggtatttggagaaaacttgaat  
agaagatcaggattttgaaaattcaatttttagttctcaaaaaattcaggaaaactctctgatgcaagttatttttttgaatttttaa  
acaaaaatttaacattcagtgatagatatttcaaccctctgtaaattccactcaaaaaatcctcataacatttcacggcctcaattcga  
taacaatcattttggtgattcctcctcgaatcgggtgcataaaaacagaagaaaagaaaggctatgttgaacacgcggtttat  
aggcgaagagattgatattagataactcgtttttgctcccttgcgcacagatagatcgtaactcctccgaccttttagcgatttga  
atcgatagaagattgctatctcacacacaacataactttttgttggaggagacaacacaaaacgacctcttttgattttaatttatt  
atattaccgccccttagatattctgagataagccagaagaatcttcatctcttatgaagatgaagcttttatttactatttcacattataata  
atacaagttcatttctctcccgaacaccgcataattcgaaaagggcggagctcgcgaattcgcatttcgaaatcggaattgtcatggg  
cggcgttatctgcaggccccagccacttactctttttctgctgatagatatttttgggtgtcgttaggcacacgggattttattatta  
tttctcccctcgaatcttacggttagttattatgaatggatgagtgaaatggatatttttgggggagaagaagttactatggtgaatgtat  
ggcaatagttgattttgattttatcgttttctggtttccgaggaaaaatcatttgaattttgtaagaagtaaaaaataaaaaatttcaaaccgc  
aaaaatgcattgatcgtcgcgagacacctcgccaaatcttgtgtccttaacaaaaataaccgtactctatcgaaaaaatatttttattttc

tgctttctcaccttcccgtcgcggtgtcaacacaatttccaccctcgccagagagtgtataaacataaacctatcagattacgtccttct  
gctcgccaaggaccaccccccttttataccaccacccaaaaatgattaacattgccagggtgggtggagctcgaccccgccacaattg  
ccttctcccttctcattgttctctctccttacatgtctgtttgtgtgtctgtcttgcctctatcttcttaatttctattcatatcttgagctc  
tcatcaaatgaagcttctgcttcatccatttctcccttcttttctccatttttcttttttaatatcccacgcggatttctgccataaatcca  
tctttcatttttttttggctcgttctattcaaatcgattccagggatgacacaaatcgagtcacatcaccagcttcacaatgtgcagcga  
catcgccgattcctgtcgaagatccgcccgtgaaactcccgaattaacagcagcaccttgcgcaggttgcgtacaattgcaccacga  
aatcaagcagaacgtgcaacaaatgatggataaattcgattgatgatagagacttgagagttttatcagtataaagagaaggatc  
gcatgtcagagattggaagtgggaaaaagatgcgccatccatcaggaagtcgaagctcgccaaatctgcaaaatggaactgg  
aaaagggtggagccggtcgcggaagcgaacccaacaaagaatcgattaatcggttggcgcacttctgaagccgcgcagaatt  
cggaaaaatttctgaatggattatcagatgagaaacgacagatctcaacaccagtctcggctagttcaccatttccagatttaacaattt  
gcaaacggattatgtgagtttttaggttacatcctagctcccctggattatttttactgatatttttattgttccagtcgatccaatggct  
caccaacaacaaatgatgaatattctggcgtggtccaacaacaaggaccgctgaaaaatgctgctggaactccagccaaac  
aagtgaacaggagaaagaggaaatattcattagacaaccgaaaaatcgaaatagcgaagagcaaccatcgcaaatgattatgg  
aacaattgacggcgcatttgaatgggtaagaattggggtctagagtcgaagacctaagtgaaggccctaaattttgaataacca  
atatatctggctgaataaatctcaccttataatctttaacacagcccgcctctcccaacaagaacatttttctgcgcaaaaaagt  
tatgtgacctctattctaacacatttattcttttttggatagatgtttcacctgccgcccgtcttttttggttgtagtttgcgaaattatcg  
cgcaaaaaagtttgggtgatagggaaattgaaagtttgggggttaaaagggtgagtcgagataaaaattgcattttgcattttctca  
agccattttacacgggttttactgttttctcaccttacgtaatttaaaaaatcatcccaaatgttttttccagaaactccaagaaacca  
acaaccaacatcagccacagccaacatcaaaacatcaccatcgcaagcttctcccgcgccagccaccacaccatccaccaaca  
ttcagcagccaacaatgccgctcgaataatgatgaagatgagttgagtcgctgctgagtcgaattgtatgacgaccaaaa  
cgacagctggcgacgcgattgacgggaaaattggtgtgcaacgcgtgcggattatattatcgattacatcggggtgagctttttgaaa  
tttttgggagaatcggggttttggatgaaatggtggataaataaggattttccggtacaaatttaaaatcataaatttcaaatctcaa  
aacatataatttctggcgcctacatatttcaaaaaagataattatttaggcagcagctgattggttttctgcctcgtcttttttgcgaa  
aaaaaaaggctgcttcgactaattatcgaatgaatagggttttccggaggtaaaaatgtatgtcaaggttttaactacctagcctaga  
catcaaaaaatagccattaacaaaaacctgggcagctgatagatatagggtctctatttgtcacctgttcccccatccaatctac  
cgtatttataccgctcaatgataattactaccttttcccttttgcagtcgaatcacaacagctctcattcttttctgtctatataga  
gaaagagagataattagtgtggtcggaggcggcggtaagaagaaaatgattaccatcggggtgaaatggatggatgatattga  
attgtgaaaaggggagcaattagtgaagatgactgagtgacacccgaacagaagaaaaggtagaaaaggaaaacaatatgaa  
taagaaaagaaaagaaatgatgaagatgacgatgactaccgacagatgaacaatgaaacacctgcaccaggtggacg  
gggggaactctatggaaggaaaagaaaagtgatggataaaagggtccccggaaattgtcagggttcagagaatctggaggc  
gtcagacaagccagagtttgaatttcaaaaaaaaatcaaaagggttttaggcgatgttacttgagaagtaggttctctagacacgg  
gtacttgacaattagaatttaaggcgcgttcttccagtttaagctcttaggagacactacttgaatatcagctgtatagacgcgagt  
cctatacagatttaggttctaggcgttctcctgactcaagaatttctaggcttgcctgcttgacatggaagctttaaaggctctgatcctgt  
cagggctgatttagggccgccccttagattagcaaaaccttataaaatttgaatttgatttcaaaaattaaaaaaattgtatctcc  
caccagacttctgaactttccacactcccagcccaagttactctgactctacctcttctattgttgattgacctcaattattgtattttctc  
gatgtaataacaacaccgataattgaacctaaagatcgaaccgaacatgatgatcactccggccgcccgccttactcaagttctttt  
cccactaattaccgaaatacaaaagggtggtacaacctgaggcgaatcgtgctaatttactttttagcacttttgaatatgattcagatgc  
ggtcattttcttttccaagatactgtagatattatataaccgacggaacaatagaataggtaggttaggttagaaaataaaacgcaa  
agataattagaggacggtgtttgcaattgagacgaagaagaagacagtggttggaaacgttctattatataacaacagagg  
gttccgcaggcagcggatattgaactcgacaccttgacttgacagtgctactgttgcactgtgccatttaaccactttatataccaaaa  
accatgattttatcgtttgtctgtttgacacggttgttagcagctgtctttgtgacatccaatgacctcatattcacaagatgacaactaaga  
taagcaggttagtagttacaagaaaaggaaggaaagagatgagtagaacgaaccaattatagtagtattagttgaagaggggtgt  
attaacgatgatgattgactagggccgggtttggggagggcacgcgtgcgcacgagattataagatacggtagataattgggca  
ggtgaagaaaaggaaaatgatgatgatgatgaagaagaaaaaatgtttggtgacgaccaaaaaattgaggattgatggggat  
tttaggcataaaaaatctgaaaattagggcacaaaactctagctaaattttgacctgaaaaccgtaaaattttagggttaattttggttcta  
aatatcccaaaatttactcaaaattgagctgaaacatcttaaaattgtttattcaaaaagctcaaaactataaaatcttctactaaaaa  
attcctaccaatttttcaattttttgcagactcatcgacctgtcatatgcgcaaaagatttcaacaaagattccgcccgaaaa





cgattcgggtgcccgtatgttcatgggaaaacgacgtaccgaaatgccaccacatttgttcgcccgtctctgacgaagcctacagaaaca  
tgttgcaaaacatgaaaatcaatccatgttgattaccggagaatctggagccggaagactgaaaacaccaagaaggttatttcta  
cttcgcccgcggtgctcaacaagaaacttccggtggaagaaggctgatgctgatccaaatgtcaagaaagtcactttggaa  
gatcaaatcgttcaaaccaatccagtttggagcttccgtaacgccaagactgttcgtaacaacaattcatcgcttccggttaaattcat  
ccgtattcatttctcgaacaaggacgtgtcgttcttgcgatattgaacattatctttggaaaaatctcgtgttatccgtcaagctccagga  
gagcgttgttatcacatttctaccaaatcttctccgattccaacaaaattgaaggaagagcttctcctcaacaaccagtcгааagatt  
actggttcattgtcaagctgaattgattattgatggaatcaacgatactgtaagtgaacacctttagaaaatcttctgtgattttaaataca  
atatgaaatgtattcaggaagaacatcaattgaccgatgaagcttccgacattctcaagttctaccaagagaaaagaaggaatgta  
tcaattgctgctgtatgatgcacatgggtaacatgaaattcaacaacgtccacgtgaagaacaagctgaaccagatggtaccga  
tgtaagttatttcatattcagttggagaatataaaaaatttctatgatttcgaattttacaaccgataagtggttcattgttgactttgctg  
gtgggacagatcttttctgttttcttttctgttttctcggaaaaaatcttcttttttctctatcccaaagtaaatattactatatcaacagg  
gataagataactaactacgtttatcccacaaaaattgattttgataaaacatagacaatcgagaagattgaaaatcaaatcatgttatt  
acagatgctgacagagccgccaagaactacggaattgacaccgatgaattctgaaggcttgactcgtccaagagtaaaggctcgg  
agccgaatgggtcaacaagggacaaaattggaacaagtcaactgggctatcggagctatggctaaaggctttattcaagaatctc  
aactggctcgtcaagaaatgaacaaactcttgatcaaaaaggatctcccgtgatcacttcattggtgctctgatattgctggtttcga  
aatcttctgatgaagaatcataatttcaaaaaatttataattttgtaatttttctcagttcaactcttgaacaattgtggatcaactttgcaa  
tgaaaaactcaacaattctcaaccatcacatgttcgttttggacaagaagaatcgcctcgtgaaggaattcaatgggtttcattgatt  
cggcttgattgcaagctgtattgagctcattgagaaggtaacaattataaaatttatgaaatatctctaatttggttcagccacttgga  
tcattgctatgctcgatgaagaatgtattgtccaaaagccagtgaccaaactttggctcaaaaactcatcgaccaacatctggcaaac  
atccaaactcgaaaaagccaaaaccaccaaagggaacaagccgaagctcacttcgcatcggcattatgctggttacagttcgt  
tacaatgttatgaaactggctgaaaagaacaaggatcctctcaatgacaccgtgtcaccgctatgaaagcatcaaaggctcaatgctctt  
ctcaacgaagtctggcaagattacaccaccaagaagaagccgcccgtcggcaaaaaggagctgctggtggaagaagaagg  
aaaatctggatcattcatgactgtttctatgctctacagagaatcattgaacaaattgatgacctgttgaactcaactcatccacatttcat  
ccgttctatcattccaaatgaaaagaaggcctctggagttattgacgcttcttgggttctcaatcaattgacatgtaatggtgcttgggaagg  
aattcgtattgtagaaggattccctaacagaactctcatccagattttgtcaacggatgctattttggctgctgatgaatcactcatc  
ggaaaaactgatgccaagaaaggatcagctgatattggctcgtttggtagagaaaagaaattggaagaagataactccggttg  
gttgaccaaaagtttctcaaggctggtattgttgcaccattggaagatttgcgtgataccactcttgtagacttattactggtctcaagctc  
aatgcagatggtacttccaaattgtgagtttttatttatttataaatcaatcaattaattgaaatgttctagatcgagaagaacgctctg  
ccgaaaaagccgaagcttcaaaagttatccaaagaaacatccgagctggggagcattgcgacactggctggttgcagactttacg  
gaaaagtcaagccactcgtcaactctggaaagattgaggtcaatattgagaagctacaagagactgttgccacactcaaggacacc  
ttggtgcaagaagaggagaagaacgtaactccaagaggagctgaacgtctcacaaggagaccgagctcttggctcaa  
ttggaagctagcaagggaagcactcgtgaagttgaggagcgtatgctgcatgaatgagcaaaaggttctctcgaaggaaaattg  
gctgatgccaacaagaattggaagttgagaagctcgcctctgaaatcaacaagcaaaaagaaactgttgaagccgaatgtgct  
gaattgaaaaagagctgtcaagatgttgatctttcattgagaaggttgaagccgagaagaacgccaaggaacatcaaatccgctgct  
ctcaagatgaaatgctcaagctgatgaaaacatctcaaaattgaacaaagagagaagaatcaagaagaaccaacaagaa  
attgagcgaagacttgcaagctgctgaagagcaaaaacttggctgccaacaaattgaaggccaaactcatgcaatcgttgaagattc  
tgaacaaacccaagagcgtgagaagagaaaaccgctgatattggacaagccaagagaaaggctgaaggagagctcaagatt  
gctcaagaaacttggagagttgaacaaatcaagagcgtatgctgaaaatgctttgagacgcaaggaaaccgaattgcacaattt  
gggaatgaaattggaagacgaacaagccgcccgttccaaactcaaaagggaattcaacaagatgaagccgctatgaaggatctc  
aagatcaattggctgatgagaagatgctcgtcaacgtgctgatagatcaagagctgaacaacaagctgaattcgtatgagctcaatg  
agcaactcgaagatcaaatccgctgactgctcaagttgaacttgaaaagaagaaggatgctgaactcggcaaacctccgctgct  
gatttggagaagctggacttaaattcggagagcaactcaccgtttgaaagaagaagggaactgatgctatccaagaattgggagac  
caagtgaacaattgcaaaagcaaaagaaccgcatgaaaaagagaaggctcaaatgcaacgcaatttgatgaatcatcagct  
gctcttgatcaagaagctaaaggctcgtgctgaccaagaagagttgccaagggacatgaagtcagacttctgaactcgtcttaagg  
ctgacgaacaatctcgtcaattgcaagacttctttcatcaaggagcgtttgaaactctgacaactctgatcttctcgtcaagctgaaga  
attggaagccaagattcaaggagctaacccgctcaactcaattctcaacgaattggatcacgctaagagatcagctgaagagga  
aagccgtgaacgtcaaaactctcgaactgtccaagaactggctcgtgaactgaacaactcaaggaatcaatcgaagacgaagt

tgccgaaagaacgaagctactcgtcaactccaaaaagccaccgctgaactcgaacaatggagaaccaaatcgagaccgaag  
gactattggagccgatgaattgatgaggcaagaaacgtcaaaaccaaagactccgaaattcaagatgctttggatgcatgtaac  
gccaagattgttgccttgagaatgctcgtagtcgcttgacaactgaagctgatgccaacagactgaagctgaacatcacgctcaagc  
tgttcctcttggagaagaacaaaaagcttcgacaaagtcacgatgactggaagaagaaggtgatgaccttacctcgaattgga  
cggatctcaagagatgctcgtcaactcaccggtgaagctcacaactccggtggacaacacgatactttggctgatcaagtcgaagg  
actccgctcgcgaaaacaaatcgttgagcgtgaagttcgtgacctggagaacaactctctgaaggaggacgtgccactcacgctttg  
tccaagaatcctcgtcgtttgaaatggagaaggaagaactcaacgtggactcgtgaagctgaagctgctcttgaatccgaagaa  
agcaaggctcctcgttgcataatgaagctctcaaatccgcgccgaaatcgaaaagagaatcgccgagaaggaagaggaattcg  
aaaaccaccgcaaggtcatcaacaaccatcgacagcattcaagccactttggactccgagaccaaggccaaatccgaactttc  
cgtgtcaagaagaagttggagaccgacatcaacgaattggagatcgccctgacctgcaaccgtgcaacgaagacgccc  
aagaatacagggtttgacaggctttctcgggtgatcattttattttcattattttcagacgttatttggaccaaatccgcgagttgcaaca  
aacggtgatgacgaacaaaaacgtcgtgaagaattccgtgagcatttggccgctgagagaaaactcgtgttgccaaacaaga  
acaagaagaactcatcgttaactcgaagctgtaagaacttttgaatgactttcaaatcaaatctaatttccagatcgagagagctc  
gccgtgttgaagctcagtcaggagcatcaagagcaaaacaacgagctcaacgctcaaaacgttgctacgctgccgccaag  
agtcaactcgacaacgaaatgcactcctcaagagcgtatcgtgaagctcatgctgaattgtccgctccgaagaccgtggacgctc  
gcgctgctgccgatgccgccaagtgagttgtttactcacagtaaccggtatcatcattttttccaggctcgtgaagatctccgccacg  
agcaagagcaatctcaacaactcgaagattcaagaacaactcgagagctccgtaaggtaaacagataagccctaactttatct  
ctcaactttttgtgtattacaggatctcaagagcgcgctgacgctgccgaagctgagggtgatgaagggaggagccaaggctatccaa  
aaggccgaacaacgcctcaagctcttcaaacgatttggaaaccgaaaccgcccgcgctggagaagctaccaaaacattggctc  
gcgctgaccgcaaggctcgcgaattcgaattccaagttctgaagacaagaagaattatgataaattgcaagaattagcgaaaaact  
caccgccaactcaaacccaaaagaaacaactgatgaagccgtaagtttacttattttcttgattgattcgaataacaattgtgga  
attttttaggaagaacaagccaacaaccatttgagcaataaccgatccggtcaattgtccttgaaaccgctgaagaaagagccgattc  
cgctgaacaatgcctcgtccgaatccgaagtcgaacgcgccaacaacgagcaaaagtagatatttccgtactttcataatcccctc  
ccccttctccccacataattttgtcgtcgtccctcatacaaaagcaaatgtcctccccacattttatccccaccataaacgtgtc  
ggttgaaataagtcattctctgatttctaaataaaaaaccactttcaaaaaaaatgataatgaatcccccattttaggtgtagtattc  
tctgttggacaaatgtcctctgattattgattgattgaagtaataaaaagcatcatctggcttccaagtgtgttattttatgcatc  
a

*Can-pop-1*

partial coding DNA sequence: join(3134..3701,3756..3905)

ctctatttcatgccatttttggatgctcgtagatagctgctgggtgtgtctctttctctattcgtcttcttattttctgttctgtttttgaa  
tattttattttattttcatttacctgttctcataaatttaataataggcttttggttcatataggtagtaattagaattgtttgaaatataact  
attattagcgaatgtgacgttttcggctcacccttgggtgaaaataaataaagagaaatttttggcgcgaagaatgtcaggtgg  
cgttttatgagaagaagcaacattttgtcgtcagatatttataaacacacacaacatttaataacattttgaaatgaaaaaacttttt  
atttcattttttgttataaaaaataaacaataattttgaaaacatttttgaaacagttcgtcgcgagactcaaacgagtgatgtg  
gctccttaaaataccctactgtcattttatttttttttgcaaaatcgaattccaccatatttcgcagaatttcgagagatttcaagac  
taacgtttcagaaaaatctaaaactcatctttcgtaaaacattctattttgacctacatctcctctacaacctattttcatccagttttt  
ttctcgttcttttctattttttctgttctcattgattcatttttccctcattcgaacgtacgttatcagctctcaaacggtcagttttttcc  
ataaattatataatggtttcattttcgccttcacttctcctgtttctatttttatgacgcctccccaccgccaatgacacccaaa  
aacctgttactttttgggtggctgttctggcgtctttttcgggtgggaaagtgtgtgtgttttctaggtcgcctgtgtttgttctatctt  
attttgaaactattttattactcatgccggttttcatctgattttgattaaatgattgaaattaagtcaattttgcaggccttaaacacaaa  
aaaataaatgcaataatgatggccgacgatgaaaatgggtgatgaggtgaaggtgttttagacgtggagaagatgtggatgatgataca  
atgatcgggagaacatccgaacaacaattagctgatgataaaaaagaagcagttttagaagcagagttagaagttggaagttgtttt  
tggggtttggagaaaaattgggagaatttggagcttctgaatcggtatcagagtagcctaattttgtgcacatcgggcttttttgaattt  
cgaaaacaattctgactcagctcattcttgcgaatttgcataaaatgcaaaatcgttcaacaaaatgaaattttcaaaagaga  
agcataatgtaacctgacacctcggctgaggtcgcggtttcaaaatgaaattttacttaaacgtttaagaccgttagaacctgcctag

atagtctatttctcaagaagccaggcctgaaaagcttttttaacttgaatgtatccatcctgattctggtagcttttctcggaaatttattca  
aaaattctacagtaaccctcatctctccattcccattagctttttctcttgccatctccaaaaataaaataacaaattaccacaaaaaat  
gtattttacattaacctaattaattgccaatcttaacttttcttcgcaccttcttcccaatcaaaaaaaaaaataacgagccac  
atgtcaaaaaatattacaattttgcccgtatccaataaaaaataaataagaaaaagttttgtggagttcaagagcggaaaattgag  
caatttctattactaaccagacatgtacgaaaagagataattataaaaaattgcgcaactttttctactgtataactactactgtttgtaac  
cgaggattaaaaaaagaggagacatatggaattgaatcaagatttctgttttcagggttcaaaatcaggaacaagcgttcatcaaac  
ccgaaccttctccatctttgccagtttagcaggtttaattgccaggaggccattcagtcaggatagcttttccaatgtttatgccgcttatt  
atggtgagttctttttcgaaaaattcaaaaaatacaacaatttctttgtcttcaaaatggaatagtcgggtccggaagcaattagc  
accacccattcattggctctctttgtctttcttcgacgacacacccttgacactttgtttttgaaaaaacatgacaaaaaggggaatt  
gtatcggtaacattttgggggagaaagagacagtaattacgattcgcagacataattgagtaggagaaaacggagcaagac  
ctacatttttggggcgagagagaaaaagaacaataattggatgatgatgatttttgagaatttgagagaggggggttcaaattatc  
gtagaaacttggaatggtttgaggggagaatttgaaccctgattttcagccaaatataatagagataattttcagcttctattcttga  
acacaaaatcaagctcttaatcgtcatagagctattcttgacgtaaccttttctcgtcaagtttaaaatcaaaattcatttctcaaaa  
ctcgtgaaaatctttctgatcactgatcatcaaaatcataacacaaatagggcgaaagaatgattcaagtcgaaaaggatgagttgc  
tcagctcaattgcaatcagcaccacaaacaatagcattcttcgcagatgctcttgcaaatccgtgtctagataatatacatagattcgt  
gtaaataaacagagattactgtagggcgtaattgttaagcaaatataatgggagataaccaatgggagattggaagaagaaaaa  
gatattatgtaattgggaattttgaattcagctcgggcataacctcattcagaaatctgtaaaaatctgtttatcctcaacagcctcttatttc  
agcctcaatatggattcagagccggactttcaccgaattttgttctcccaatgcaagctggtctttcaccttcatttaatatgtttcaacatct  
ccattttatggtgctcaatggctgcagttgtaacaacatatggaaaatgcagttccattagcagcaagatgagaggaacaccatt  
gaatccgttgaatcaaatgagaatgccaccgtatcctaaatccaggaaatggacattacatcaaaaaagaaagaggacatggcggag  
gtgaaaaatcaaaaaagatgatcatatacaaaaaaccattgaatgatttatgtggtttatgaaagagaatcggaaaaaattgctgga  
tgaaattgaaataatgagaacaatcggtgaattgaacaagaatgggcaaaagatggcatgatttaccacaaagaagaacag  
caaaaaatattttgaattggcgaaaaaagatcgagaagatcataacaaaaaatatccacaatggtcggctcgtgaaaaattatgcagtta  
ataagaagaataagaaaaagaggaggataagagtattagtaagttgtttttgttagaaaaatgaaaatataattgtattttgtagttcag  
tttcggagaatggtgatcagaagaatgctgagccagattggtgtgataatcaagaaatggtgtgaaattctgtaagagaaagaa  
gaagtgcgaatattcagagtatagaaatacagatacaatgatgatgatttacaagatagaggaaggaaattttgaaaaattttgtggg  
attcaagaaatggactgggcattttgtggatttttaggttagagaatcaaaataaagatgtttccgaatatttttaaacccgaaaattcgg  
atttttgaaatgttaagactttgaaaatccacgttgctaagttttgaaaattattgtgtgaaaaatcaacataccaaagtttctagatcttt  
ttaattcaaaaaaattgaaaaattgttgactgaaaaatcctcaaaatgaaatgctttccgaattttacatctcacgaagttcacctgatct  
tgaaatgtccccatttctattaattttgaaatccaacattttcatttaacatactttcaggatcactggccatctccattagcctctccata  
ggctgatcaccatgggtgcaaatgctctgattcagaatctgatgtcgaagatgaagatgtcgtaccaacaatttcacaacaagcaa  
gagaagtgattatgcaagaatcactatgtactttataagaaaatctcgaagaaaacaatcaataatcagttcaaatccgggtgtttttca  
cttctcctcaatttttcaattttcatttataatacaaaatatttattcttttcaccttctctataacctttttgtcaccaatttcgctgaattgaa  
acaggtgctccaatttctctctttttttgattttttctgatttcacactatctttttggttttttagggatctgtgagtttaggtaataaaat  
gaatgaccaagaaattgtgttctttttgtatataatagttgcgggtctttttggaccacaatctctttttgtctttttgatgatcttttctctat  
ttatattatgatgaaaatttttttttaattcagaagatgatttgtagacaattattatgcaaaaatttttgccattaaagttttcaaaata  
aatttttagacgccccaaaaatctacaataatctggattagattcaaacattttttatttcgaaaatcagccagaaaaaattgaaatta

*Can-skn-1*

partial coding DNA sequence:

join(2362..2763,4598..>4928,5401..>5544,5941..>6205,6774..>6863,6945..7296)

agtagattttcagaaatgaaataattagattttatttcttacgttcaaacgtgaccatttttatctttcgaaaaaatctgaaattaatttattct  
tattttcatcaattcgaatttctcgattttctaaaatgccaatcaaaaagatcaattctgtgagttcaatatcgtaatttcacgataaaaaacta  
ttaattctcgaatttctgagcattttctgcgtacactgtcccttatcgcctcgtgattttatcgaaaaaatcaataatctggcgccattttcct  
cgcaatttcattttcaatttcgaattctatctttttctcaaaattctgtcatgtttacccccgacctttttgtagataattttgccccaaaaat  
ccgtttttcttttaaaaaaacgatgtaaacacacatttttgcgcagcaaacatcaattttgttcgttctttttgttctgtatctttttcgctatt

ctctcaatTTTTctctgtcacagaccacgaattgccgcaactctgTTTTcatctgctctccatctgatttctcgccgggtcaaaatttc  
cctctTTTTccaactTTTTctatttctatttctatttctcatctTTTTcctgagccaggTTTTccagaaaaaaacaatttctcacggctgc  
tatggagattTTTTattgattgtgcaatttatttctgataacctgaattaaattttaagtTTTTgttttagagaaacaaaaataaattagta  
aaaatcttggccaagttcatttaattgTTTTctccgctctctgatttctagTTTTgtctggtgcccttcttatcaggacaagtatggtt  
ttggcaaaatgcttatcgTTTTgaaataaatttctgggttctcgatttcaatgatcttaattcttgagttggaatttctccgctctcggttc  
cccacaatctctaacttctgatttctgattgagtgagtttcaacgcaaatgcaatttctgctctctgccttaaatatcttggctgct  
agatattcaaaatagaagtgcagtagagcaacttgaaaattcgagaaaaactgtatgctatctcccgttctTTTTctccacttat  
ctttatctaccgttctctgTTTTggatgatgcaaattgtctgttactaatgagaaaagtgcaaacacgctccaatcacaatttctgTTTT  
ctgctctctctcaccttctccatttccacgttggatctatgaaaaagagcttatcaaatgttgaaaaaaagccttccatacaaatagat  
aactTTTTaaaatttccatataaacctgTTTTctcgggcaacacaattaatttctgacaaaagtcacgttctgtaacgaaagaccgt  
attgatgatgatgacggatagctatttctctctTTTTctctTTTTctctgtagtactttgtagaatgacagacacacattgaga  
aaatagcttccacaattgtcttctctcaaaaaacatatattgTTTTgatcagactagactctagTTTTatttctcagcaatctctatct  
ggctcgctgTTTTctcgccattcgtcacccaaccagaattcgcacatttggcggaacgagcgatttggagcgaagtgtgatcggattg  
cggaaattacggaaagaggtatatttggatttgaaaatttatgatttggatgaagaacagtatttgacaataaataaattattgct  
taaataatttcataagttatttctcgaagagttcaaaaattttaaatttcagttctcagacttctgaaaaatttaagatatttggtaattg  
agaagtgtcatgctgctcatttctcgaacaaaaacaatgttctatattatctcattgaacttcaaaagttctgtgTTTTagccaagttagg  
gatttataagcctaaatctaggcctaactcagaacagaatgtagtcatcaaaccctaaattgagcctcgaaaattttagttctctg  
aaattcaaaaaatcacgttatcatccaactatacgaatttctgaaaaaccaattaatagtgcaaaatttctccaacctgccc  
aaaataaaaaaataaattactatgatcacatgcactttaattcacctccaactcagaaaaacaggaatccttgggaatgat  
TTTTgagcacacaaaatgttctcgaatcaataatcaggaaggatattcggattatcaacaaaatccaaatcaatattcaaatgatc  
ccaaaatgacgccaggttctatcgtccaatgggaattcgttggagagatgacaaagttgatgcaagttcaaaactatgccaatttaac  
tgaacacagatcagcctcgccatttgaacaagaagatcaaaatcaccatcaagaccaaccctcgaatcgttggatacatattcat  
atgattcgccatttggaaagatgctgatttattgattgatttattggagaagtgatattcggattgaaaaaggtgttagacaagttgaccgg  
ctgaacaatatgaaagagattgcaaatgtgactgagaaatcaactactgtaggTTTTcaaaagttggatttggggttaaaaat  
gatattgggtattgaaaaattatccattcaacaaaaatcaaggcataggcaattcgcacacaaaaattgtggcaacatttctctac  
atccataatcgaaccaagttcctggttcttgatgaaaagccatataaacacaatcgaccaatggctcatttgggtgagtcgaatccca  
attcaaaatcagctgttccatcggaccattttagactgatttgtcatttagcttattcaaccaatccaaatgttTTTTctgtaa  
gaaattcgaaaattgcatgagaatggccaaagttcgaacaatttgtcgaattgggctaatttggaaaagcgggattatag  
aaattcaacgatcaaaatgagctctaaacaaccaatattttaaataaaaaccgttccaaacaaaaattggtcctTTTTcctgtgt  
caaatTTTTtaaccaacttctcgaatttgaataaataagatttctgattcatcttgatactcgccaaatgtctcccatactctaca  
aagtttctgctggaatccacatcaaatcaactcgaacagttgtaccaatggtctctacatttggcaaccctgcaaaaaatgttctctt  
ttgatttctggatttggatcataaatgacttctcatcattggatgatttaccgaaatgccgaaggatgatttcaattaggatgtttga  
actattgaaagtgatgatactctctcagaagctcaaccaattactaaaattaggagttatgagtagtcaaaatcacgagacctct  
ccagagacaatctatactTTTTcaagttctcacgtaatcttcatcggacaaagaactccacaaaaagcattgtattttatcagtttta  
ttcgaaaaatgatgctatcttctgattgaactattgtaaaggaaaaagtcgtaaagtctgatggagaaaaatgaggaaaaata  
atattgagcatttgggtcaacgccttctgataaaaaaaagtaacatgctcagaaaaaggattatacacagtgaatagattcagag  
attggactgtttaaaggctacgatgggactgaaaaaggattggagctagaatcgggatcggaaatcttctaaactctgtaaactt  
gggggagaatcgcggaatttctctgatttctatagatgatttctTTTTgatttgaactcgccatatacaaacggttatcctaagattg  
atcttctgatgactcgacgaatgatttctcattcgaccatcaagctcttatttctataaaactcggcttagttgagcctaaccttcaagc  
ctacaattggaatgttctcatgtttagtatttatttctcatccaatcgaaaaatcagtgctatttctatttctatttctgcctatatt  
cccatttctaccaaccaacttcttaacttacatttgttgaatgtaataactgtaataatcgaacattcatatcgagatttattgctg  
agttctcgtgattgaaactggcacatctttagaggcgatggtatcactactgaatagattcttgaatcaacagtaaaaatgttagaaa  
cagtttcatgatttggtagaacaactaatttctcgaaggcgccaaactttagggaaagtatcagatttggaaaaaattataaa  
caatttataatttccagggttgacagctgaagagcatcaaatgagatttctcgaagggaatttcaagatttctccaagtttgc  
atctcacaataaacaacaataaattatcaaaataccacaataataattgcaaatgaaaacattgaaaaatcgagttgaccaattc  
caagcgatgaagattggctgatttgaagatgttcaaaagaagaatcacaattgaattggatttattgatcaacaaaatattgtgca  
gacacaacaatcacagcagccaatttgcaaaatgttctcattgagcggagggaattgttattcgaacaaatgtgagttggattttaa

aaagatatctgaaacatttccgaaattgtaaactaaaattcaagcccccaaatattcttcaaccaaattaatagattcaaaaattttcc  
taagacctgagaatcataaagtaattccactaatgagatctgtcactgtgaatagttacattattagaatcttttctcgaacatcattttg  
tgctacaatttgcctcttctatcttcccacctcataagcctcataataatcatcgcccaaaggcttcccacttttctcttttaaaaacag  
cacgttccgttcatcttctgattcctgatatacgattatcagttacgaaaatgcacagtttccgactgaacgataaaaactttttcgttca  
acgtcactttttgtcatcatcaaaaatcttatttttgggtttccctttttatttctgtttacagtaaccgaaatgagcatgttacgaagt  
gatgaattggcaccactgctccaatgaagattgcaagctgagacgttttcaatcgactgattcgaatacaatgcaacaatattgat  
gccggctgaagctgaacctgtgatggtatgttcaagattgaatagtttttaattgtccgattcaaacagccgaaaaattagatcatctg  
gtccattcaaaaatcaaaaacgcccgcatttttgcctaaaagttagctgacctgagatcaaacctataattatcgctttatccgagct  
ccgcccatttcagctctaaatttaattagctccgcccatttttgcgacactgacacatctcctcaagggtttgtgtataaaaaggagt  
gtactatagtgaagacacacacttctaagctgagcttctcgcgaactccaactgaatctcaaaaatgaactattcaacactcc  
ctatgattttcggcgcttttccaactccaccaactggattttcagcttcccaccatcgcaattctctataattccaatgatcaacgaca  
ctcgcacgaacaagttcgaatggaaatgttattttgatcatagatattcgagaattccaccaaccgcaacagcaacagcaccaac  
aagaccagtaatcatgatcaactggagctgcgattcaagtcattgggtggagctgcaagaaatggaacaacactttcaagtcca  
cttttgatccatattcgtatgagacaatcgtttctgatgtgaagtttttttaaaattaaccaagggtcccagaaaaataggcaaaaa  
caagagatacaatattttctagaaatcttctgatctacccaaaaatattctagtttgactattccatttgaattcgtgactaaactagac  
agaaatcatccatgttttctcctcaatgtcatcttttgcgaaatcgtttcattttaattttcacatctacttagatattgctagctcgata  
ttttcagccacttgaagagaaaagccgacggcctagaaaaccaaatttttcttcaatacaaaaatcagagcgctctcgagcag  
ccgcaaagtctactgtattttggttttcttccacggcttttattttcggattgacaatacctttttctattttcggctctgtttgaaaatgga  
caaccaaagtcctatggaattattaagcgaattgttgagaattttgtaaagttgaagagaagaaaacatggtaggccctatcataaaa  
tcatcgcactgaaatcaataaactattgattttgcagtgatacgtcatcgactgttcaagattgtcatcggaatccaagatataatag  
agaggaaggaacgagtaaggaattccagctagcaggaagaaatagagttatgacgtggcaaattgacactttgtggaattacg  
aaattagccaacaaatcaattgattttcagattctatggaaaattgattccaaatgatttcactttcggctcgtcaaaactcgcaattcgga  
aaatctcacgtgtcattccattgactggacaacaacaaagaaaacgtggaagacaatcaaaagatgaacaactgcaactgaaatg  
gcactccagtcactgctcatcaataagcgaatgagccttccgaattgcaacaagtaactcaaaatcgacacattgtccgaaggct  
aaaaacaattgatccgcaaaatcgtcgcggaagaacaaggtgcccgcgactgcccgtcaaagaagaactgatcgaca  
tggagagccattgatgaattatftaaagttttattggttcttacttttaccctattatatacctcgaaagggctcgtatfttaatt  
atttaattcatgtgaattatattgtctccccgtttttaaaggcctggagcctttttctccccatactatttttagaaacgggtagagctcc  
gttgactctttttatacccgaatgatctgtatttattatgagttttcaagtttcaaatatcccatttctccccccagtgaaaatgtacacat  
gtttatacccaatcaatctcccctaaagttttttctattgagatttattttgatttttaattgattttttgaaaaataaagttgaaaaatgata  
taagtgagagaataattatggttgcatttctcgtcagtttgcggcgggtggagcacaacagcaaggttacgattgaagagggatttttga  
cgaaatgagaaatacaccagattcgagctcatcgccaatggccttgatccgtgacaatctgaataaaaatgagctgtggtcagat  
ctggtgttccagtttcaattgtgaaaaaatcaactcattatgaaaatgagaattttcagtaacatgtaaaaaatgaacaatttttagat  
aaaattttctaactttcacgctgacatcgaaactataattggaaaatattacgaaatgttcaat

Partial Can-SKN-1 coding region:

Kmfsqsnqegysdyqqnnpqysndpkmtpgfyrpimgirwrddqslmqvqtmpltehrrsaspfgtrrsnpsrpttsnrdtysy  
dpsledadlidvlwrsdiaiekvrqvapaeqyerdlqmltekstigtlaeehqryedlskgmfqdfypsfassqnnnnnyqnthnn  
nlqmktenrvapipsdedlaalledvskeesqnlvfdqqnivqtqqsqqpilqnvslsegivysqnnltemslrsdelaptasnedl  
qaetffnstdsntmqylympaeapvdvfpssqfsyipmindtaheqvsngnvdhrysrpptatapatrpanhdqlgaaisal  
ggaarngtlssplfdpyhsmrqsfsdvtsstcsrlssesprynreegtsqgipasrfyglipndffgrqtspirkisrviptgqqqrkrq  
rskdeqlatemalpvtahqisemslselqvklidtlsegqkqirrrrgknkvaartcrqrtrdhrgraidmnyi

*Only a single SKN-1 orthologue is apparent in C. angaria. A search of the partial Can-SKN-1 protein sequence to C. elegans returns Cel-skn-1 with an expected value of 1E-109.*

*Cpo-elt-2*

join(5001..5043,6093..>6148,8819..>8900,8953..>8982,9039..>9128,9187..>9328,9384..>9438,9823..>9908,9961..>10129,10212..>10309,10902..>10985,11050..>11153,11235..>11455,11554..11631)

ttgtcatcttgatgaaaaacaattcccaaaaatcccaaatgaagctgatgagcggaatgatgaaggctcaaatgagtctaattg  
aagattcgggtgctaagattttcaattgaaaaagagaaacaccgtgttagctcaggggatgtgagagaaaaacaacacattagg  
ttgtgacgttttataagaaaagttcagaatgttattcatgcaacctggaatgaagtaagtctctattttcagagaaaaatgtgaaa  
actttggaatgcaaaaaaaggaaattacggacagttaaactataggtcttctgctgtagatatttattagatttcggtgacatgac  
cataattttgtccctagtaaacatttagaattgaaatgggtgatcagactcgtaaaaatgtttctgctcagttttatattcataattgtaaattg  
tttcatttcattttgttttttgaattatataatagcactgttgagaaatgagacattcccgaataaacctgcccactttgggagaactca  
ctacccggagaactgaaaacattctcgaaccgagttgtttcagcattacatgaccataaaaaattgaaaatcattttcgaattaat  
aactcgtttttgatgacatgtctcagttcccttcagaatctttacacagtttctgacaaaattttcaatgagaaaaataaaaatcattcat  
cataaacagtattactgtcagttcatgatcgtactctcaacattgtattcattgtatgagtttccagagatatttcataaccaatcagataatt  
cattcagttcacatacaagtatatattttgatgaacatacactcaaatcgcgttaataatcagaaatgacagcttatcaataaatctccatt  
aaaattcatccaaagtctacaaaaccgatattatccacatgtttccatgcgaactaactaagaagattttcaatttgcgtcaaaagtccga  
taatgatcctactagtgtgatgcctctgtggaatgatgctcattccgagtttctgactgatagaagatggctgcacatcagatcgcctgct  
gctccaaaagtagccattgctgtggctggagttctagtctggctgtagtactaccttgggtgttattttatgtaggtatgaacaaaa  
aatgaatttcagaaagccatgcatttcaggaatcctgatgtagtgcactgcaattttcaaccgggaaaaactgaaggaacaactca  
gcgacctctcaatccaggagatatacactctgtagttcttctgcacaacggtttgtgatagcactgaaactttttgttcaactcaggt  
tctttcgaaaaatttccagactgtgagctcatcgggaagttctcatcgtcattttctcaaatcaacatccagctgatgctattaacagccgt  
tcgtaaactctatttctcaaatcattcaagaaaaaccttctcattataacatgaaaaatttcaattgaaagttttgagagagttttaca  
acagtattgaataaatatttgatattgatgttcaatctgataaacgttcaataaaagtgaaaaatttcatcgtaattcacagtaatttttg  
atatagtgaaaattataaccaggtgcccggagatataaaaagctaatagattttgtctaatggatggaatataaccgaacaccctcta  
tctactgtacttataaaaactttaattggaagaaatattggtcactgattcacgatagaaatgtttctgccagttccagagaattttcgagttg  
aacaataaaatcaaagtttgaattgaatacgttctagttgaaaaatgagaaactaacataagttggaacgttttgactgataatcgt  
tttaaaaaatgtgttgaatgacatagttgtgaaaagttaacacaaaaaaaatcacatccagttttcgattaattcaaaaattgtg  
agaaccactctcgattcgtttatagttaaatcaagatttcagcgttttgggtccggaaaaaactgcacaggaattgcacgactatct  
ctgtgtcattcaatgagtgcaaaaaacattagttgaaaaaactttataatttttcttctactgcttactacgcccgtgaaactc  
ttgtactccaaaaaccagaaaaaacatccaagaaaaaccttctcatcagatttattatactctattgtgtgcatagaatattacca  
aatattatgtcatacaaccaatccgtcttattccatcatgtcacaaatgatatcattccagagacaactccgcgagccgacaatgca  
agactacaacagtgacaccggctccacaacaatcacaacattactacatgccattgaaccagttgagcagctataagacaaccaat  
gataattcaaaattatgacagaagaatctttgagttataaactgctcactttgaaaaacatctcatcgtaactcacatcgactacca  
aaaaataattttcaacaattttcttttataatcttaaatagactataagtaattaccataaaatcgaaatattttgacttaataa  
acacattttgacctggaacaacaaaattgttatgatggcaatagaactgataaacaataaactgaggcaatgaagatatttgaa  
tgtttttcgataaactcgtgactattttcaagagaaaaatattctacagtgagcggctacttctataaataatcaacagttataata  
aaattagccattgatgaaaaagacaatcacatcataagcagacagcttttcgagttcgagtaattgttagttttgaaacgaattggga  
aagttgtaatttcaattgagtgaaatgatttatttctgaaacctgaaagtttgaaccatttttaacagttattttgagcccaa  
ctagaaattgtttataataaaaaaagacaggttcaattcattttgtccatttttaagtagttttgggacaattcagaccacctatgc  
agaaaactaccacattacgttttttaatttcatgttttaaaatgaaatataccaagacaaattgaaaattaccacaaaattgaggtat  
gatacttgatactgtatttaacttctgttttcaaataaaagttcaccgggctgtggttaattagaggtgtaggcttaaacctggacc  
aggccgagaaatattaagtagagtcattttcaaaactcagcaaaaaatcccaaatatcaaccaatgactccttattttccgagct  
aactgtttcatatcgggaaaaatggcagaacaattgagaagaattgaaaatttcaaaatccaagtctcaaaaattatgaaatga  
tgattttagtcggttttcaccagaatgatattttgtagaaaatgttacaactggctgaaatcatgaaaagttttcaagacacttcaacc  
aaaaataaaacgttcatatttactctacagacctcggatttctgctattttgaaatttctccgggctgactcgaaccttattctgaaa  
attttcgaacaacttctacgatgttcaagtttttcagaaaatgtcactttttcagacacttactgaaaaaacaattttaagcatttcaatc  
ggttttgtcgaaaaacttactcacatcagcgtactttgtagataaaatctattatcaaatatggaaaaaaaaatgataaaattggtttttattt  
atcacaataattgcaaaatccgctgaaaattcatatttttcatggagcgttctgcaattggaaaacatcaaaactcgaatcgaaaaata



ccactctatcagagtatctctgttaaacgtaaccctgaaactaaactttcgagaacaaatggaataagggatccaatcaaaaattt  
caaaaacccaaacttttcatgtcaaccctattagtttccaacatatattttgcaagagggggcacctccaataacttcccttccctttcca  
ccactcgtctactttttctgtctaccattgtctcaattaacaggatgattccatacaccgaagtaataactccttatcaatgttggtg  
ttgagcgggtatataatgtagtttgagaaaaagtgattgccgaaactaagtgctgaatatggttgaaatacattgacatggttcgagtt  
cagaaaaacggaggcaacttcggcgctgggggaatcagtcattatgaaattgagagaaaaacgcatggaatcaagaaacattgt  
ttcactcaaaaattcaactcagaaacacattaaaattataatagaagagctttgaaaaaataagaacagtgaggataatcatgattt  
tcatcacagttcggtttgaacacgcctcatgttttgatcgaatgaactaactaggtaaatgtttggatctggattttagggttcctaaaa  
aggaatatgtaggtagctataagtctaaacaactgtcacaattgttttcgaagaactgtcagttgaatttcagaactcacaatcgtaaaa  
atgtgaaaatctttttgtgtttttgagacgtctgtgtacagtgtagggagtgatttggaccaataattttctgaaggaactccatacctca  
gcaagtttcaaaccatcattgactagaatgagctcaactaaaaatgacaccaattgaaagcagatagattcacgaagttacac  
cgagatattgaaatactcaagaatacgtttatcacaactttccgacaatgtttctggcggtttcagaaaaactatggccaggattattgga  
agaaaagcacaactaaaaacgcgggtgagttttcatgaaaaaaagagatccctaacaaaaacaattttgtgaaaccttcggaaa  
ctagcgtttttgaaaacaaaatttgaagttggactgttttttaatactatttctgcgttcacaaaaatcagaaacaaaaacctgaa  
aaaaatcgagaaatgactggcaccacaactacaacttcatgtagtacgggaaaaaatccagacactttcgaatataatattgaa  
attttctccctatttgcagaaatgatgacgtacacactgatttgggtgcaaaagtcgatctttaaagttttaactgacattaacatgatttt  
caatcacaaccaaagcctcatgagattcctaaaacgttaattttacataatataactaccagcaaaaagtgaatttgatttcttgatt  
cagtgcaataaatctctcgtttttgtaattatagttttcgaaaaatttgaatcaaaaattgaaatcacaatgaaaaacaaagaaa  
gtgtgtttcaatactactatcaacaaaaaggttagaaactcaatcgcgaacttttcaacgttatattgaaaaagataatgttatctgt  
aattgataatcttccatctgaaccatagtgatatcaaatcatcctgaacgataaacacagaatagtgataaaaaataagcattttcaattt  
tcacgcctctccttaaccctgtatattcagacttcttcagatggatttttggtttgaaactttcacccccatattcaaccttataatagctaa  
tatatgcgatgtattaatgatggctgtattatattgtgtataatgttgggctgaattgctgaatagagcagtgatgtgcacatttcattgccgtc  
atftactgataaggatacagtagccggaatattgaatatagagtcgcgccctattacaacaagtggaactcaaggttctaccatcatttt  
tgtgcaaacctcgatatttctgtgggtacattccaccatccagaaaagcgaagaatttcaaatttccgaggaagtacagataatttttg  
acaaaggtgagtgctattgaaatcgaatataagattgaattaattttgacctacgtatcacaatgatgtaaatgtgctgaaaaa  
agattaaaattgaaaaattaaaacgagttcgagaaaaataataaaacaatcaaatcatcggttgattcgttatcaaaaattgtctag  
ataggtgagaaaaacgtttcgaaaacttttcagttttaaagtaagaaaaccaccgaataaccaaataaaagaaaccattatgagtc  
tctgcgagcttctgctgctgggtcaagtttcgatttgcagaaaagttgatttctcgaaaaactttttgctgaaaattttcatcaactaaattag  
aaactttaaagtcataatcacgaaattccgtattccggtttatgaattactgtatttccgctcgaataatgagaattttccaaaatcg  
atagatcaagaaaataatcaatgaagcttacacaacacacttggcaacgaatgaacagttcgagttgctgtaacaaaattgctgc  
tgtaaaaactcaacaagagttacaactgtttatacttttaaaacacaaaaacgtgatggaaggaaagaaatcgttgattttctcatga  
gaaaacgtattgagatgctgaaaaaccatttccacaagtcactgtgattttaacaacagtgcttctgctgatttcaaaaataatggtctc  
tattaaatttctgtatcactttatttttctgatgtcaacaacgatgtcagagcaccttttccaaaattctgacaatgattttaccacaaaagt  
gatcttaatacaaaaacaaaataaataagacaagaaagattttttattttctgtataggtcggaaatgatgaattgataacttccctcaa  
tagtttgggtgtagttttttctggttatcttgaaccttcacaatcaactatgagcatagttatcaaacctgattatcaattcagaagcca  
ctatttcagtaatgtttgataattttcagaataaaactgactctataacccttgaatttctgtatatcttttccatccggttttgattcgtgata  
aaccaaaaatcaaaaaccgtgactcatgttaaactatttaattttgaaaacgcttatttcaaccgtactctcctgatgggaggagttgg  
aacacaaaactggcgaatcagaaaacgtcgttttaaccatccagtcgagtcgggtacttaccctcaacagtaagaaggggcgggtgat  
aagataagacgtgagcgtgtgagtggtgagcgagcacataattctcgcacatactggctcgtctattagtttcaaatcattttacccttcc  
atctacccttacaatctcctattttgcttgataaaaattatctacttttctcgggttctatcgtttcacacgtttttctgctaccgctgttttt  
tgtgatctcaaaaaacttatctataaaactgatgaaaacataaaaaacgtctaacaatgattaggaagaaataagggagttcatt  
aaaaaaaagattaatggttcaaagttttatgaatttaggaaaggactctgtggaatactcctttatgaactgaaagaatagggacaat  
attttaaaagttgataaaacaactgacatgagaaatgttatgaaatcactgcatagggaaattatgtattactaaaaaaatcgataat  
gactataatattcaaggaagttcaaaaatcagaaagttttgtcagattcaattcattgaactagattcagtttaacgtataaatttcttta  
tgtagtactagaacaggcgtggttctgggtcagttgataggaacatcaatttccataaggaactcgggttatcatggaccaatacaaca  
aatgtaattctactacatgagactacatgtattcccgcacaaaacccaaattttcttagatcagaaaaattgaagtgctgattgaaatgaga  
aaataataagaaatagaatgcgactgaaactgattcaaaaatccattattggcattttgtcgtgaccattcatcttaccacgttgatttt  
cgaaacgattttgggttctatgtgactttttgcaaaaagacttttcgatttcacataatctttattatcggttcttgactaatctgacaaaacggc

cttacttcttaggtgtccgaactgttggttttgtaagtgaacgcttggtgtatttgaaaactgtgtacttctctggattttaaattgcaag  
aaaactcattatttcgatgtcaaatggccgtccatctgcaaaaatccatttctcggattgtcagaaaacgataataaaatttttg  
aaaaagcctatctggaccatagggagcgttgagccctactgcggtcatcgagaaccgcttagccaatgagtgtcagttagaatc  
acactgaatttcgatgaactgtatcgaaaaatcaatcattgacacaaaacatcatttatactgaaccacaccgagatgagttcaaatta  
ccgatttcttgggaatgtgtccgacttttacaattatctccaataaactgaatttccaggaagaatggatggtcaacaatatatggat  
ggagttggccagaaatgcgcaaaaatcagctccaactgccaactcaaccggtacatcccacttctcaacacatttcaatcaaagaa  
gaggatgtccaaaagttagtagaggaatgcaagaactgacaaatagtgagttacgaagactttaaataatgttttgattgatgaaatt  
acaaatttcagtgaataatagatgagttcaattgacagccgccagagtgatcacaatcaaactgggattgattttaaactcagatttt  
caaatgaccgtaagaatttcccttttcaaaaaattgggttttagttgacttattgaactccagctgctcatttattggagggccattgga  
ctaccaacagttcccgggtttattgacaattcaattttcaaacacctaaccctactacaatccagtgaatcctgcccagctcagctcgtt  
gagcggatttctggtgactcgtgaagtggaaacacctttgaaatttaatagaaaaattgtgagctttcattacagatcgttgatgatcggcc  
aatgtcttatgatgcaaggactgcgttcccacaagttgtgagtgtaagttctcccacgaagaactttttcagtagccaatgattttcgaa  
cgagaccatttctatctgaaaaacaagaacaaaaaacctatgctttttgaaactcaatggcgactaatcgtttcatagtggacctaatac  
agttctatgaagccagttctatgaagccgagatgatcagttctgtgaaatggttcagaactggtttttcgcacttttcaatcgacaaattgat  
gatccctttttccctaatacatgttctgactagggttcaacaacgttttttcacataaaatcagactgttcaaaaaatttggtctgacatg  
aggttgcaaaaaaacacatttcaaatcactaacttttgcagaatataacgtcccaatgctgcttctatgaatgcctgaaatgt  
ggaaacctttgtggttgaactataaaaaatgtgaatggagggtaaaaaatgaaccgaaacttcacaaaatcttctcaactctcaattttc  
agacaaaatttgataactgtagtaaagaagtttacgaacaacctacatcacatattatgctactccagctccgccaatcattgaaaca  
caactgcagttgaacaacagccatcactccagcaccggcaaaagccaccaagtctgtaataagaaaaatggcggatcgggtac  
gcaatgctttatcaccaaaatccgggtttgaaacacagacctaaatttcgaaattggttggaatttttagtttaggtaattcatcaaga  
cgtcaaggattggtgtgttcaattgtaacggaacaaatacaactctgtggaggagaaacgcagaaggagaaccggtgtgcaagta  
tgtatttgatctttcgaaaaatagggaaatcactggaattctccagttgtgaggggtgcttagagtttttagaaaatttaagcaggtca  
gcaggttttattccgcagttgagctgtcgttaagccaacctactgaaatgatcagctgaccactgaacgtaattttcgtctgagcaggtt  
agctgcaacctatacaattatgatttttgcatttagcagattgcttaatacaagcggatagcctgctgaaaccaaaccaactgaacc  
gaaccacaaccgaaaccacaattcagctgatttgaacgaaaccagctaaactgcttgaataaccgagtttcgctagaaataattct  
ctatgttggttcgaaaatctggttaatcagatattcagattgaaaatctgacgtatttttttcttctcagcaacttctctgaaagtttgatgt  
gaagtataattttgagacaccggtatttctgactggaactttgaaatcttgaataactggaacagaaattttcttacctatacaaaatttc  
aagaatcaatttttgtttttcagtgcatgtggtcttactacaagctgcatcacattgccaggccaacttcgatgaagaaagaagggtca  
attgcaaaactagaaaaggtgagactccgttcaacattgttttaatttttgggtgaacagcgaatttttaatttttaggaaaacgaataa  
gagtgaaacacactcaactccaacaagttccgcacaaaagaacggaagttgatggatctactgctgcagacagagccgctgcta  
gaaatggtgagtataagaagtaagaaaaaatagctgtgaaactcagaatgaaaaattaaaaatttaattgtgtttttcagcttc  
atctatcacctacactacccggctgcgtatccggtcagtagcgggctcaagaaacaccatactacactaccaacaagcatcgtgg  
aatgcagttatgggatcgtcgaagacgctcatattagcttaccatttggcctagatccagcttcccaacaactgtctactcaactc  
attcttacacaactccagtttctcctcaaaaccagatgtaagtttagtggaaagaaattaagagagaaaaaacgagcgacacacta  
tttctgtttcaaagctctgttcataattttattgaaaattacagcttcaagtcataccggttcaagacgatgaaacaaaagcggcggca  
agagatttgaagacactacagacgaagtataagcttttaataacacttttagttgaatcacaataaaataatttattgcattttatggtt  
cgagttttatcagctcatattcatattgaaaattgtttgtatacaggatattttggatttttctctcattttttgaccaatcagtcggctgtaa  
agttttttttgatgataacttacgattttgcaatttcagaactgttttaacgtacttagtcattattatcgttttctgacaaatccaatcaaatggc  
gtaattttgcaacttcacaactgctagtcataaaaaggggaacagttggtacgctttaaataatgatataattctcttgcaaaactcaaaat  
ccaggagaattggtcagtttttacagtataaccgagcgtccctcacatcaagacgaacagctacggttccccctaaagtttaggccatttg  
gccggattgtcagtaaacgatagtgatataatataagaattgaattgaaaaaaatac

*Cpo-elt-3*

join(1604..1682,9347..>9535,10540..>10645,10985..>11108,12491..>12667,13144..>13238,13  
296..13440)

gataagctttacaaattcgtgaagttataaactaactaacgttttctagttttgttcaatgggtatfttcctctatcagatcaactatttgaacgg  
aaaagaaatagtataatcccataatfttttttttttctgaacataaaaatcccgaaaatgccctagttccaaaattgttgaagttttgagta  
gtttggttttctgattctcgacatacagtagccggccataaagatactttagctctgcgaggttcaaccaaccaaattcaactgattttattc  
ttaaacttgagaagtaggctctgagaacataagaaacgtgctcaaattttccatattaatftaatcacttttcacagagctacaggaaa  
aaaacacgttttttctgtctttatgacctatctaatctgaatgatgttcaaccagtttcttgaaaactgtatcacaacacggctctat  
taacagtagatcacaacttctgacattatgatgaaaaaaaaattgggtttcactttcctactgtagtacaactttaaataattcatttttca  
cagggcacacttttaagtacagtttttcaacaaaaactactcaaaaaaccattattcaaaaatacctaaaatacgggtcggcaa  
aataaaagaaatctgtactcgtacttgcgaaaagttgaagcatgtcaaaagttgagctaaaacgagacagccgactttcccagaggt  
gactttcaccaaaagaagcaccaaaataagctgccctgaccaccaagcggcgaacttcaaaaatacatagtgtaacatgctctcggc  
atggcgttattgtttgactaatcaactcgcgccaatacaatacaaaaagaacatgggtgtgggttggcgggagccaactacc  
gagcaacattatcagtagtataagtagacaatgagagaacacccaaactatcataattagtcacatgatagttcgtggtggtttca  
tggtgatctatcggtttcttttataatgagttatagaatgtaaaattttcatttttataatttgaacttttctcaaaaattatgaataaga  
ctgtacaaaacaggtgtttcagatttgagttaaattctgttgggttgggttggcctccctgttcaaaaataatgaaaatacatttgaata  
tgaaaatctaaagtaaaacaaaaacaaaaatttctactcatatagtagtagaaaaatttggttctcaaccaactttgtttcgttttgtttt  
tcataatttgattgaacaaagattattgattcattcagctgggtgttttttattgtatttctcacctgtttttctgattcttaacttctaggttct  
tagggtaattttcttttttaagcttggtagcagctgacgttttaatacaaaatttattcttttccatatttaacacttttatagaattgaa  
cgttttttctttgtaactcaccaaaaagatgttcaactttcagagcagtgataattataataacataaataaagatgaacagcttct  
actcgacatccccacaatctacagaatccgattcttcgagcaaaccaactacaatgactggaatgtaattttttcttcttttgggtcag  
atagttttgaaaaaatcaaaaaatacaacaaccgtgggaaaaagaaaaatagatttgatctaatcgaattgtgatgtagaattg  
gtctgtgggggggggggttatcatataaaaaatgaacgaaggatgatttttccaaagttcaaacggttgaacgatagttgagat  
atttttgaaattcctgggggtttgggggtcaaaaattttttcgaagaaaaaaatttcatcaaaaaatttttttgaaaaaaaatttctt  
ccgaaaaaatatttttttaagacattaaaattttgccagttactatttagtcttcaacaacatgtaaaaattttgattctagaaca  
ttcaaaaaattgatcgctccaactataacgtttttttcaaaaaatcttttgttagttattgtttgatcaalatttgattacatttagacattaca  
atttgagacgatgatcgttagtfaaaaaattggtcccctctttcatcatcgtctctttcatcgtcaaaaaattctacttttcatgttccatg  
ttttttgttagtgcattctcttccaccctcagcactcatcgtccaattttgtttattttgattttctatttctttttatattttttaa  
aaaattgagaagtttacttcttctcagagtttctgatgaaaaatcatattttactgtttttgtattaattttgtccacattgattttatagctgact  
aattgcttcaaacgaaaattttcatcgaaaaatgataatttctgaactttttccataaacagtttacaattttgtgatcagccaaattttgtc  
gaacaagcgatttctgtgaacagaagattttgtgaacagacaattatgaaaaaaaaattttgtgaacagccgattttttgattatcc  
aacttcaacaacattttctgaatagatcggtttttccatgagcagcgtagattttagggtgaacagcagattttttctgaagtattctaaa  
aaattctataataacgttggaaattttttgtcgaaaaaaattttaaattttgtttggaaaccgttttagagcaatgtattttgtgaacaataa  
gatttctgtgaaaatagcggcaaaaacttctaataacaatgtcaaaaatcagttttttcgaaaaaacggctatattgtcaaaattttgatc  
gaaaaaaagactgtttgagaaattctgttcaatcaaatcagctgtcagctgaattcaaccgtttgaaaaattttgtgaatagttcaaaa  
aaattgtgaattataaaattgccaggaatgcgactcgtagaagtgattgaattatccatggtgcattttctgtcgaagaaatta  
aacctttttgatttttagtaaagtttactgatcgtgatttcaaaaaatgtcagatttgaagtttcatataaaaaattcagtttaagaaaa  
acagaaaattaagaaacgtgctcaacgaattcatgatttcaactacacaaattttgatattgttggtttcaacgatttcataatattgg  
tattcactgaaatagctaattttcttccgggttttctaaaattgatgtttaaattgatcgtttttgatggatattcatgcttgaacacctag  
cagaattttgttctattagcggcgactgaacagcctacattgaactgagtgagttgaaaaatgctattcttccgtcattttgaggcgttcta  
gtcatgcttattaggttttgaaatgctgatctgtatgaagtcggccgcttcgaaaagctcgtgctgactgaagtttcttattacaact  
tccgaactcaaatatcaaaatttctcactctccaaacacaattctatatccttatcatcatttcttccccattgttcttcaagatacgt  
tataatatcaacaatttgaattgctgtagcttttctagaagattttagcagccactgatgcttcatcgtaaaacttctcgttctcctttccct  
tttcttgaattggatcaatctgttctgctgagggctgacccttgaaaaattacggtagacaatacgcacgcaaaaggcatgcagag  
ggaaaaaggcgcagaacgttttgggttgattacaacaattctcgcgcttactacgtggtcactactatctttcaggggagaactatftt  
tgagactgtctgttttataatcccttgcaacggttgaagtgcccggaaaataactgaagaaatgaatacaactactagagggtt  
agttgtcagtcgaaagcaaccaatacattgttccaggtcattttctgagatttacttctagcgcacatccgttttctccatcataaattatca  
ctagcaagcaatttccaccccatagggctctatcttttcttctatcacaacttttcatcagcatcagcagcatcagagtcgggaatg  
tatgttgacgtcttcatctccatctcgccttagttttcgccttcaacttctacgcagcgcagcgcgatcgcaaaatgcaaaaacgcaaa  
aaagtacagtactgactgcggcgagaatagagaccacgatcaaccacaatttattgttaaccgctgttctgatccttcccactacat

ccatccatctcctatccatctatccgtctatccatctatccgtccatccgtccatccgtccaagggacagcgacagaacgacgcctgagg  
cggggaccgatgtcttttcttttcttttcttttccatttccattttctctgttccgtccaaccaatccgagtagaaacggtattagaaaaagg  
aagaagggaaaaaagaaagagcgcgtaataactgtatgtctctggagaagggctgatatttctcaaatcactgcatcactttcgctcc  
acgatcgaccccggtaccgaataagctcgtattgttcttctcccacccatgattctgatgggtgctgcggttagtactcgtttgaaatcg  
ttcttttgataaataagatattctatcaacttccgaattgttccctcctcattcatccggacgatgaccaattaacgtttgcagcctagatag  
attctcgaaaaagtactgataactatttttgattttgaaataatgaagtggtgtaataaaggatactgtaataactactaagggtct  
cgagcagagtcctaatttgatatttttcagttcggaaagtacatttccgaactaaagattcattttacttcaaatcttacaagtggtggtg  
ttgttaggggtcagaaattgatctctcctgaaaattcactcagagtaggtatttctgatccaaatggttttgattttatttctgggagtttctg  
gcacctgttaccagttatacagccctcaggctctcaaacacaaaaagcagtttttgggtattttgccacggaagagacaattttt  
gagattctgacatagctgaacataaattcaaacgctgaaaaaataatgagtcgttttccagttgcagaattattccgttggtatacaattc  
acctcaagactctgaaatttggattgactggataggtttcgaatctcttgattttgccctataattacaattccatgactgcaaaattgaa  
attctgtctcaatagccaagatgacacgtggaaatcaatttcaaaatccacggaccattcgaacgcgtctgtgaaacgaaaaattca  
aaatttcagttgactgttatagggactgagtacaagaaaaacgttctgttagatatttacaagtagaaaaattttttaaatttgctcc  
gaggatagttgtcttggatcccaccaagctaaaactgggaacgagtggttttcaaaatcaaatagtagagatgaaccacca  
aaaaccatagatcgtttttcagatcaaaacctcgagaacaaaaaaactgctctaggcctcagattcttataaaaaagcaggat  
tttattaaaaatcaatttctgcagtaatacgcagtaaaagctatggattactataatcttcttctgttggctccttctctatttttaac  
ccacacctgattactttcagtttattcatttctattctcaattgaacagatttttccaacaatcttaggcagtttttgatctactttgccat  
tataggtgctttattgcattatctgtcctcatcttctcaaatcagtcactagaaaccacaattctgaccctctgaccttttaaaatcaga  
aattcatttccatgatccattgaactacattcactcttcaatttgataagcatttgttaaatgttatcatttcttccgaacgcctactgatttta  
acgcttttgaaatcttctgattcgtttgaaaataatctgataaaacttgttgcggtgtttatttattacaactctggttcaaatcgtttcaat  
cattttgttgttttcaacaataagatagaaaaagcagaagcaggagcagcaaaacaatacatttttgaaggaaaaaaagaaacgtt  
tgtaataatttgtattcaataaaaaaacgagatcagagacccaaagttctcacgatttgaatctgaatggaagcttttccgttccctacctt  
tccgctactcagagatggcggaaaaccgtaccgattatgaatatgtaaattatgtaaattcgtgtttgaaaccagctcgaagttttctca  
cctcaattctatccaactttgtcatttttacttttactttctactttctcaattggctatcactttccattttcaatttctgtttttcttttcaagt  
tgcgacactaccaccaccacaacattatgcaataaaagcagtaatgatagtgaaatgtagttgtaaaaagaatcaaaaaat  
ttataattttctattttctattttctattttccattttctcaacagtgatttgaaaaagcgtctccaccagactagccagctataagtctcggct  
ctctcggccattgatggcgaaaaaggaaaaaagatgggcccggcgaccactctgcataccgtagtattactgccaatcacgggg  
cattgtctttttgtctattcaacgtttttgcgctatcggctatcatctcccctcacgcacgcccgaatcaaataccacataccaaaaat  
gtaactactactcataaaatcattattattaacaagagtatttttctgcaaaagttttggttttgcgcatttttctttttgattgatcca  
tcgattttcaaatcttccgaaattcctcaatttttgacttcagaatcagaatctgtgataagataaggccaaaaaacacgcttagata  
aaattaaggaaatggggggaggaggatcaaaacacaccccaaaatacaaagtttcaaaaaacaaactaacacagccgtaaca  
agggacctccagagttaacaaatagttgaaactaattttctaaactgtggaatgaaaaacgccacatagcatcacaggctttaa  
aacgggaaaaaacacattttgaccgtaattttcgaattttcgaacattttccagtaagaatgagctgggctgtttcattttttctgata  
gagcacacttaggactattgaaataaaaggattaggtattcaaaaaacagtgacctacagccaaaaaacagctcagctcgtttatgtg  
attataccacctcaacaaagtgaatgtgttttgaatataccgaaatccataaatttttaataattgacacccccagtgcttaccagga  
aagaatgaccagtagatcgaatcttttgagagaagttgacaatttgcataaagagagtcataaacgctgtctcggaaatttttttca  
ctctagtttttccagatcatatgaactactttgtaaaatcttggattttcaaatttttgtctaaactctgaaaccttctgtgagaacttttagca  
gcttgagaccagctaaactgctgaataggtcaaattacctgctgaagggtcagaagataagctttctcaattcagtaactaactttctga  
ataccccaacttattgaaaactttgaagtatctgattagcttagaactgacgacactctgctaaaatttttccagaatctacagatgtttg  
tcgattagacagaaaatcttccatttcaacagagtaacaaaaacgcgatttcaaaaggttttgcgaaagtttgaaaatcagattgtttttt  
ttaagaatctgtcgaatttgaaaacctgttgacttgacttttgaaggataatctgtgaaattatgatattttctgaaaaccgctaaaac  
aagacagctcattttgattctgaaagtgacttttttagcagattagccgaccttcagggttagataatcaattcatcaatataacctgctga  
acgtcacaggaattcagcaggttatcaacgagttagctgtctaatgtaaggctcagatagtttagttagacaaccaattagcttattgaaaact  
cgctgagactagctaatgaactgttgactttgaaaatgacattctgtggatcagttgaccttcccagcaagttttcaaaactcaattcaatt  
aacaagttacctgaacaactctgctaaacctgtaatccatcagcttaccttcaaaaaaccgctaaaaacacgattctcagattccat  
aactttgaaaaagttctctttgtgaaaaaggttacgatgtacaatataaacagaacatgcaaaaaatggaagggcaaagcttggtg  
aaaaatagaaagtatgagaaaggagtcactgttacacatatcaaatatgtggggaagaagggtttgccatccgattgatgtttaca



ctttcagcgcttgaactgtatttccgtaaaaaacaaccgcaaacgaccactctcattgCGaaaggatggcatcatgaagagaaatcg  
tcgccacgaaaccaatcgccaaatgggtggcatcagaagacaaggacatgctgcagcttgctagttcaaagcgagcaactcacta  
taatTTTTCGTTTTTCTGTTCAAAATTTGATATCTTATAACCCATATTGACAGTTCAATGGTGTGTTGACTGTATACAAAATGATGAC  
atgaattgaatcagTTTTGATTGTAATTTCAATTTCAATTCATTCATATCACAAGCTCGAATGGTGCAGATAGTCATGAGAGGGTCAACT  
gaaacccgaaataaccgaataaccaactttctcaatTTTATGTGATTTTCTATATTTCTTTCCGTGATATCTCCCTTCGATTCTGAAGA  
aaaagtctagtattcaataactcttgccatttccatactgatcttgattacctaaccataatcttattcactgCGaattttccaatatcat  
atcttctgttattgattTTTTCTGATCATGTTTATACTATTAGTCTTTTTTTGTTTTCTTTGCCAATTGTCATCGTCAAATGACCCTCTTTTTCAA  
ccaaccttttagtaccacgtaaatTTTCCCATGACTCGAAACTCGAAATGCTCTCTGTTCCCTCTGAAATTTTTGTGACAACCAATTT  
ggttcattttgtggatatttactggattcaagttctacagtttctattgttctctatttttctctatatgttttgtttttttcttccattttatTTTTat  
cataatTTTCTGCATTATCAATTTTCATAATCATAGGCATAACAACCTGTATACCATGCACACAATAAAAATATAAAATTTCACTAGCTCG  
gaaattagaacaatgaaaaaatgtgacaaagttgatgacctgacaaaaaatgaaaaaaactgTTTTGTTATCAATTGGA  
gattggtaagagaacaaggTcattttgCGATGACTGAAAAATGACGAATTGCGTCTACAGAAGAAGTGCAAAAATGATCGATGAAT  
ggaaaaatctccaaaaactgggttCGAACACGATTGAAAAAACTGAGAGAATTCATTG

*C. monodelphis elt-2*, *elt-3.1* and *elt-3.2* are described in Eurmsirlerd and Maduro, 2020.

## 2) RNAi clone information

Sequences used for RNAi constructs (feeding and injection, where applicable): DNA was amplified from genomic PS1010 DNA, or synthesized directly, and cloned as HindIII / SacI fragments into the same sites of pPD129.36.

*Can-skn-1* (smaller 520bp region from genomic DNA, contains a small intron):

gatacgtcatcgactgttcaagattgtcatcggaaatccaagaatataatagagaggaaggaacgagtcagggaattccagctagc  
aggtaagaaatagagttatgacgtggcaaatgacactttgctggaattacgaaattagccaacaaatcaattgattttcagattctatg  
gaaaattgattccaaatgatttcactttcggctgcaaaactcgcaaatcggaaaatctcacgtgtcattccattgactggacaacaaca  
aagaaaacgtggaagacaatcaaaagatgaacaactgcaactgaaatggcacttccagtcactgctcatcaataagcgaaatg  
agcctttccgaattgcaacaagtactcaaaatcgacacattgcccgaaggTcaaaaacaattgatccgcaaaatcgctgcccggga  
aagaacaaggtgcccgcggactgcccTcaaaagaagaactgatcgacatggaagagccattgatatgaattatatt

*Can-skn-1* (larger fragment, 750bp, synthesized cDNA):

aaaatgttctcgcaatcaataatcaggaaggatattcgattatcaacaaaatccaatcaatattcaaatgatcccaaaatgacgc  
caggtttctatcgccaatgggaattcgttgagagatgatcaaagttgatgcaagttcaaactatgccaatttaactgaacacagatc  
agcctcgccatttgaacaagaagatcaaatcaccatcaagaccaaccacttCGAATCGTTTTGATACATTTTATGATTCCCATCT  
ttggaagatgctgattgattgatgtttatggagaagtgatattgCGATTGAAAAAGGTGTTAGACAAGTTGCACCGGCTGAACAATG  
aaagagattgcaaatgtgactgagaaatcaactattactggttgacagctgaagagcatcaagatatgaagattgtcgaaagga  
atgtttcaagattttatccaagtttgcatttcacaaaataacaacaataattatcaaaataccacaataataattgcaaatgaaaac  
attgaaaatcgagttgaccaatccaagcgatgaagattggctgatttggagatgtttcaaaagaagaatcacaattgaattt  
ggatttgatcaacaaaatattgtgcagacacaacaatcacagcagccaattttgcaaaatgtttcattgagcgaggggaattgtttattc  
caaaacaatttaaccgaaatgagcatgttacgaagtgatgaattggcaccactgctccaatgaagattgcaagctgagacgTTTTc  
aattcgactgattcgaatacaatgcaacaatatttgatgccggctgaagctgaacctgttgatgcttccaccatcgcaattctctatatt  
ccaatgatcaacgacactgCGCACGAACAAGTTTGAATGTTGATTGATCATAGATTTCCGAGAATCCACCAACCGCAAC  
agcaacagcacaacaagaccagctaataatgatcaactggagctgcgatttcaagtgattgggtggagctgcaagaaatggaa



caacactttcaagtccactttttgatccatattcattcgatgagacaatcgtttctgatgttgatacgtcatcgactgttcaagattgtcatcgg  
aatcaccaagatataatagagaggaaggaacgagtcaggaattccagctagcagattctatggaaaattgattccaaatgatttca  
ctttcggctgcaaaactcgccaattcgaaaatctcacgtgtcattccattgactggacaacaacaaagaaaacgtggaagacaatc  
aaaagatgaacaactgcaactgaaatggcaactccagtcactgctcatcaataagcgaatgagcctttccgaattgcaacaagta  
ctcaaaatcgacacattgtccgaaggcaaaaacaattgatccgaaaattcgtcgccgcgaaaagaacaagggtgccgcgagg  
cttgccgcaaaagaagaactgatcgacatggaagagccattgatatgaattatattaaagttttattggttctcctacttttacctattat  
atacctcgaagggtct

*Can-pop-1* (773bp from genomic, contains a small intron):

cctcaatatggattacgagccggactttcaccgaattttgttctccaatgcaagctggtctttcaccttcatttaatatgtttccaacatctcc  
atttatggtgctgcaatggctgcaattgctaaacaacatattgaaaatgcagttccattagcagcaagatgagaggaacaccattga  
atccgtggaatcaaatgagaatgccaccgatctaaatccaggaaatggacattacatcaaaaagaaagaggacatggcggagggt  
ggaaaaatcaaaaagatgatcatatcaaaaaccattgaatgcattatgtggtttatgaaagagaatcgaaaaaattgctggatg  
aaattggaataatgagaaacaatcggtgaattgaacaaagaattggcgaagatggcatgattacccaagaagaacagca  
aaaatattttgaattggcgaaaaaagatcgagaagatcataaacaataatccacaatggtcggctcgtgaaaattatgcagttat  
aagaagaataagaaaaagaggaggataagagtattagtaagttgtttttgttagaaaatgaaaatattttgtattttgtagttcagtt  
cggagaatggtgatcagaagaatgtcgagccagattggtgtaataatcaagaaatgtggtgtaaattctgtaagagaagaaga  
agtgcgaatattcgagtgatagaaatacagatacaatgatgatgattacaagatagagg

Partial Can-POP-1 protein sequence:

Pqyglraglspnfvlpmqaglspsfnmfptspfygaamaavakqhmenavplaasmrgtplnplnqmrmpylnpgnghlhqk  
erghgggkikkddhikkplnafmwfmenrklldeignekqsaenkelgrwhdlpkeeqqkyfelakkdredhkqkypqw  
sarenyavnknknkrrdksiisengdqkkcrarfgvnnqemwckfckrkkkceyssdrntdtmmdlqdr

*Only a single POP-1 orthologue is apparent in C. angaria. A search of the partial Can-POP-1 protein sequence to C. elegans returns Cel-pop-1 with an expected value of 3E-64.*

*Can-elt-2* (no DBD) (522 bp genomic fragment, contains small intron):

aactttcgcaactggaacaaatcaagattattgtataacacttctcaatttttaacacatattcaactcaaccgcctccatcacaatatca  
tactttatcatcatcgaagtggccgggaaattttgaattcttgaatgtttctgatttcacaataagaaaatattttcaagacatcaactcca  
attttttaacagattttacgataattcggcatttataccacaacaacctttcgcgccagcaaatccagaatgtgtcaaatgcgcaaatcca  
gtcatttccggaagacaagttgatggtggatataatgtgtgatactgtagtaattctaattgtatattgttcacgaattcaacaaactatt  
cgatgccactttctgttcaaccaattgaacctgctcaattgaacaaattccacctccagcaccagcaccatcaaaaccacaaaa  
tcatcaagtaacaaaaaagctggatcagctggaagcacaatcgccgacaaggattggtt

*Can-elt-3* (no DBD) (270 bp fragment, common to short and long isoforms):

ccgatgctcaatcaacaagatattgctaaaccgatgaatttctccaccaactacatgggagccacacaattctccaccaacagact  
gtgcaactcaatttctagatctcagcggcttctccacattcaactcgtgtgatccagctctaccattaatgcaccagtcaccttctcaaca  
aaattatgatgaccacattcaactttacaccacctccacaagatccattggtcgtgaacaaaaaccactgtcaaaaagcgaatgg  
ct

### 3) Plasmid maps and cloning information

All fragments were amplified by PCR using Q5 polymerase (New England Biolabs). Plasmids were cloned by Gibson Assembly into pBluescript KS- digested with BamHI/HinDIII. Fragment sizes include primer overhangs for Gibson Assembly. Linearized plasmid maps and primer sequences are shown below.

pGB598: *Can-elt-2::ELT-2::GFP*

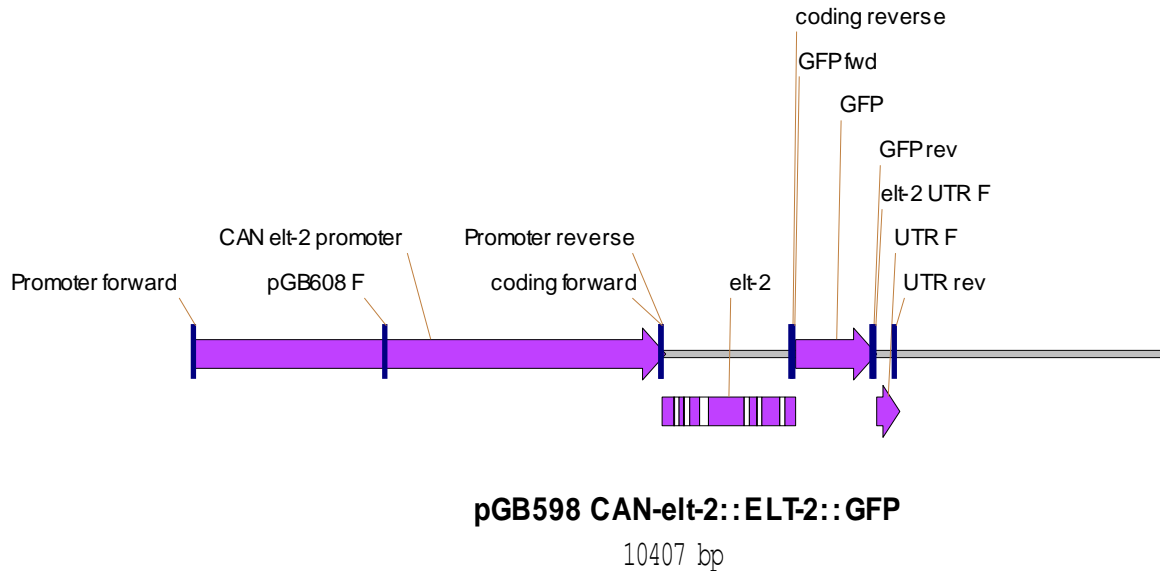

*Can-elt-2* promoter (5040 bp amplified from PS1010 genomic DNA)

Promoter forward, ctatagggcgaattggagcttcatttattatgtcattacggaaaaccg

Promoter reverse, gacgcatactatcgatccagggactctcgatcg

*Can-elt-2* coding (1436 bp amplified from PS1010 genomic DNA)

Coding forward, ctggatcgatagtagtgcgtccaccaacattgcaact

Coding reverse, ctttactcattgttctcttccagatctctcgag

GFP (870bp amplified from pPD95.67, introns not shown above for simplicity)

GFP\_fwd agaggaacaaatgagtaaaggagaagaacttttactggag

GFP\_rev aatagttgaactattgtatagttcatccatgcatg

*Can-elt-2* 3'UTR (251bp amplified from PS1010 genomic DNA)

UTR\_fwd atacaaatagttcaactattttatcaataattgctc

UTR\_rev cgaggtcgacgggatcgatagaatgctcatcttcgcaaactcgg





atcattttttatcacaaatcaacaatctagatcacctcgtttttctcaaaaaactcaaaatatcatttctcctactctttttataaaaaatctc  
atattcgaaaacaggaagggtgacaataaatgtgagattttctcgtctctcgggtctttggaaattgaaatttttgaacagacgagggttga  
atgaaaaaatgaaaaaagaaaaaaactcaaattatatggaatgagggtgaaatttttgtgctcttttccggttaatagaaaa  
atggagcaaattgaaactgaagaattgcaaatgggcaaatcatctgaaaaaatgtgggaaacaattaatttctagtttttctaacac  
tcaattgaacgtttttgtgtttgatgttgacattgaaaatggaagggttttccaattttcattggaaatgaatgacttcaattaaaaaga  
gaaacaaaattgggggtttttcgggaattcgttattttgagggaatcgtttgtgtgaaattcattgaaggaaaatcagtttttgaatccc  
tggaacgaaacattgaaaaaaatgacgaacgtcctgaagatttcaattttacaaaaaataagaaatcgtcctgtaagttaaaa  
attttctcaagatttttgttgaatttgaatcggaccctgaaatcaggcaaggcccaactcaaaatataaaactcttaaaaacgcggtt  
ggtttttccggcatttttctatctctcgtcctcagatcaatttaataactctcaaatagtttttttctgtatcgtttttccagggtttccgac  
tttcaaaagtttgcagaacattgtcttattcagactattcaaaagttcaaaaaacaccgctgatattttctcaaattccaatctgttttta  
tattcttcacattatacgcataccgatttaataccaatattcccaaaaaaattgtattttgtactaataaaactacatttccaactttatttctgt  
tattcattcctaaaaataataataactaataattcataaacaataatccacatgttcgagggatcgacatataataactcaaaaaatcgtctt  
aacatcgacgtcgaaggatgatgaatctacctaaaatcgtctgcacgtaaaataagaagatttggtagtccaagcaagccacacc  
tcatcctgactatttattccatctcatctcatctcattcattttatttggttgatttggtttcaaacgaaaaatggttgagctcaagtctcact  
gctcaaaaagttgcgattccaattgttggactcattgtctgtcgttggttcaacattggttctatataaggatgaacaataggaa  
aggaaattgtattaactgaaatttccagaaaccgggtgtcactgactcaatcttggaaactccaccgaagaaccgactactcctcgt  
cattttcgtatgcaatccgctgatggcgaaatggaacatctccaggtaataaattatattcaaaaatgcatctgatttttctctcacaatca  
ttcagaactcatctccacttggcaatccgctcatcaaacaccaacaactgcacatgatcgttagttgaatttgcgagaacagaa  
aaaaacataaaaaagcatgttggttttgatcaaatgaaatgataaatcttcaaaagtttcagatgttttattttccagtagctaca  
ccacttctcctccaattagtagacaacaacttcttccagttactcaaccttcaacaacttccacaccttcatccaattgaaccaac  
acaacatttaaaataattattttcaataaagtattttctgactcattcaaaaaaatgcaaaaaactccctccaaccctttctgtct  
ttttttccaacaaatataaacgatcgaatataatttgaataaattgtagggcaggcttggcgtcatgatgttactgataaggctacag  
tactctatattgctggctgtcaaatatgtattatcgtgaataaacagaataaattcatttccagactagaaaacaggaaaaatagaatt  
ttgtgaaaataagataaattttgaaacatttcaaaaagttggtatgattatggtatcgcagaataatgtgtataaatatattat

pGB608 *Can-elt-2::ELT-2::GFP*- smaller promoter- (diagrammed in pGB598)

all primers used to generate pGB608 are the same as for pGB598 except the Forward promoter primer :

*Can-elt-2* promoter (2990 bp amplified from PS1010 genomic DNA):

608F, cgGCCGCTCTAGAactagtgatcaaagtgaatgatgataaatcttcaag

Promoter reverse, gacgcatactatcgatccagggactctgatcg

pGB612 *Cel-end-3::END-3upstream::Can-ELT-3\_DBD::CFP*

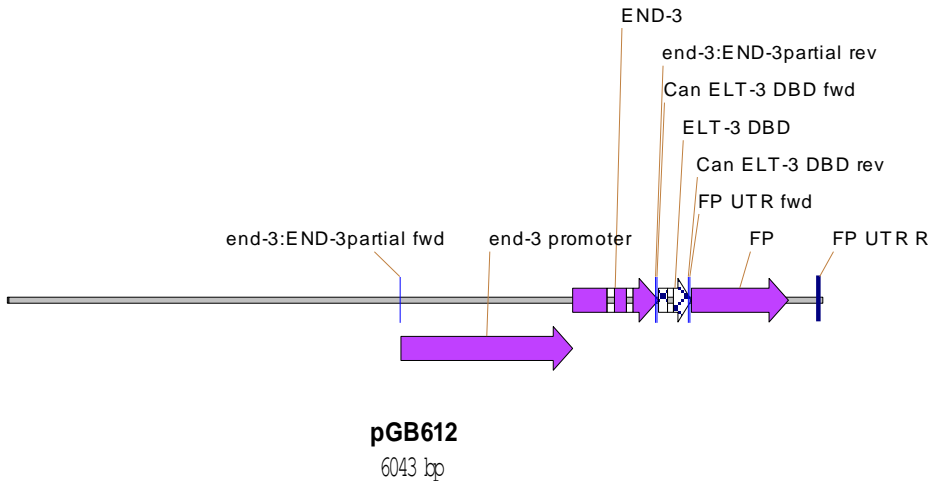

*Cel-end-3* promoter and partial coding (1976bp from genomic DNA):

end-3:END-3partial\_fwd cggccgctctagaactagtgcatccaatttagtgatatttattcc  
 end-3:END-3partial\_rev agtttgagcacgaagagttgatatgcattg

Can-ELT-3 DBD (265 bp from PS1010)

Can ELT-3 DBD\_fwd caactcttcgctctcaaactgcaagacac  
 Can ELT-3 DBD\_rev ctttactcatgcatgtggcttgcctctg

CFP+UTR (988bp cassette)

CFP was originally amplified from pEB1-SCFP3A and the *Cel-end-3* UTR was amplified from genomic DNA. The CFP and UTR were stitched together by PCR using the following primers:

CFP UTR\_fwd agccacatgcatgagtaaaggagaagaac  
 CFP UTR\_rev cgaggtcgacggtatcgataagctcttccactatagtc

pGB608 sequence

tatcgataccgctcgacctcgagggggggcccgggtaccagctttgtcccttagtgaggggtaattcgagcttggcgtaaatcatggta  
 tagctgttctgtgtgaaatgttatccgctcacaattccacacaacatacagagccggaagcataaagtgtaaagcctggggtgcctaa  
 tgagtgagctaactcacattaattgcgttgcgctcactgccgcttccagtcgggaaacctgctgctgagctgcattaatgaatcggcc  
 aacgcgcggggagagggcgttgcgtattgggcgctctccgctcctcctgctcactgactgctgcgctcggtcgttcggctgcccga  
 gcggtatcagctcactcaaaggcggtaatacggttatccacagaatcaggggataacgcaggaaagaacatgtgagcaaaaaggc



cagcaaaaggccaggaaccgtaaaaagccgctgtgctggcgttttccataggctccgccccctgacgagcatcacaanaatcg  
acgctcaagtcagaggtggcgaaccgacaggactataagataccaggcgttccccctggaagctccctcgtgctctcctgtt  
ccgaccctgccgttaccggatacctgtccgcctttcccttcggaagcgtggcgttttccatagctcagcgtgtaggtatctcagttc  
ggtgtaggtcgttcccaagctgggctgtgtgcacgaacccccggtcagcccagcgtgctcctatccggtaactatcgtcttga  
gtccaacccggtaagacagcacttatcgccactggcagcagccactgtaacaggattagcagagcggaggtatgtaggcgggtgcta  
cagagttctgaagtggcctaactacggctacactagaaggacagatttggatctgcgctctgctgaagccagtacctcggaa  
aaagagttgtagctctgatccggcaacaaaccagcgtgtagcgggtgtttttgttgcaagcagcagattacgcgcagaaaa  
aaaggatctcaagaagatcctttgatctttctacggggctgacgctcagtggaacgaaaactcaggttaagggttttggatgagat  
tatcaaaaaggatctcacctagatccttttaataaaaaatgaagtttaaatcaatctaaagtatatatgagtaaacttggctgacagtt  
accaatgctaatacagtgaggacctatctcagcgtatcttattcgttcatccatagttgcctgactccccgctgtagataactacga  
tacgggagggccttaccatctgccccagtgctgcaatgataccgcgagaccacgctcaccggctccagattatcagcaataaacc  
agccagccggaagggccgagcgcagaagtggctcgaactttaccgctccatccagtctattaattgttccgggaagctagagt  
aagtagttcgcagtaataagtttgcgaacggtgttccattgctacaggcatcgtgggtgcacgctcgtcgtttggatggtcattcagc  
tccggtcccaacgatcaaggcagttacatgatccccatgttgcgcaaaaagcggtagctcctcggctcctccgatcgttgcaga  
agtaagttggccgagtggtatcactcatggtatggcagcactgcataattcttactgcatgccatccgtaagatgcttttctgtgactg  
gtgagtaactcaaccaagtcattctgagaatagtgatgcggcagccaggttcttggccgctcaatacgggataataaccgcgcc  
acatagcagaactttaaagtgtcatcattgaaaacggttctcggggcgaaaactcgaaggatctaccgctgttgagatccagttc  
gatgtaaccactcgtgcaccaactgatcttcagcatctttactttaccagcgtttctgggtgagcaaaaacaggaaggcaaatg  
ccgcaaaaagggaataagggcgacacggaaatgttgaatactcactcttctttcaatattatgaagcattatcaggggtattgt  
ctcatgagcggatacatatttgaatgtatttagaaaaataaacaataggggttccgcgcacatttccccgaaaagtgccacctgacgc  
gccctgtagcggcgcattaagcgcggcgggtgtggtggttacgcgcagcgtgaccgctacactggcagcgccttagcggccgctcc  
ttcgtcttctccctccttctcgcacggtcgcggcgttccccgcaagctctaaatcgggggctcccttaggggtccgatttagtctt  
cggcacctcgaccccaaaaaacttgattaggggtgaggttcacgtagtggccatcgccctgatagacgggttttgcaccttgacgtt  
gagtcacggttcttaatagtgactctgttccaaactggaacaacactcaaccctatctcggctctattctttgattataagggtattg  
gatttcggcctattggttaaaaaatgagctgatttaacaaaaatgacgcgaatttaacaaaatattaacgcttacaatttccattc  
ttcaggctgcgcaactgttgggaagggcgatcgggtcgggcctctcgtctattacgccagctggcgaaaggggagtgctgcaagg  
cgattaagttgggtaacgccagggtttccagtcacgacgttgaaaacgacggccagtgaaatgtaatacgaactcactatagggcg  
aattggagctccaccgcggtggcggcgcctctagaactagtgcacaaatgagtgatatttatttcccttctcatatttctgtacaattg  
atttcttcaacctgttctagtcataccggtgcaaaaacttttattcattcacttcgcaactcagtcctactaaaatattgattctt  
atgttgaatacttttcttttctgatatagaaatgttccactgcttgaactgttgaatgggtgttctgggggtcacaagtaaaata  
gatttgcacaactttgactgaaacgaaatttgactttcaaacatttttacctaatttgagaaatgcatctttggctcaaagggtgagact  
ctgtgtaggtctgcagcgaacaaaaatattcgcgcaaaaggcgtgttcccttaaatagtagtgcgcaataattttgcagtttcta  
cagtatacccagtggtgtcagagtgctccatcgggttgatctcgtagatctacgggaatagcggtaatttgacgcagatttctcaact  
accaaaaatatttgggtgagaattgaacagaaaaagaagaagaaatacaagcatgctgagctttacacaactttatctaataaat  
attcaattaattggatcagtttctcttcagcaattcaaaaaatgttccgtaaaaatgtgaaatgattggattggagagaatcgagtttt  
ggaaaaataaaaaacaagagcaacgtgttatttcatgtgatctttaaataatgcaaacggtattttaaattgatttcccctatca  
gaacctcttaaatcaggtttcaaatccctcttttcttactcttctcgcacgtgaaaaacttctccgaatgataattgtgttt  
aaaatggaaatttattgaagtaaaatfatgaaacaaatacttttagttaaatccgagatgcaacttctatttgagagagcccacggt  
taaaaaagaagtaaaagtataccaacaagatgttccaagtgtccgatggctccgacaaaagagtatacactgattgtataatcg  
gttagatgaatagctgaaagtataccaggtcaagcacacccccgctgtgtctcttagaaaaaggcgggtgctgaaaagtatacg  
gaacgctgaggcagccctcttaccatgatttgcctcaagataaatgaataggcattctcattcaagataaacatgtactcgaact  
cattctctcatcatcttcaactaccaatgtctttgatttggattccctcagtttccgcaacaagtccaattcaatgaagaaggct  
acgggacacctctccagatgtctccagaatataaattatcatcattatccggcacaagatagacgacaaattcatacaatggagg  
ctatgacaattcaatgcaacagaatttatgcaaccagataatgggtcagggatactacagtgagtttaaaaaactttttactttat  
atttaaaatgaattggtcagatgaaaactatcaacagatgcctgattttcaatttccagttcaaaaattttagatttcaaatcaattg  
aacgacgcttataatggataaataactatgaaactacagcctaacttaaatatttttagacctccagcaatctcaacttccatcaacc  
accaatcccgaacaacaatgaaaattccatgcccagagataccaattgacgggggctcaacttttccagctcaagaagtcaagaat

```
ggaagccagctagaaaagcttcgaaaaataaaatcaagaagattccacaatgcatatcaactcttcgtgctcaaactgcaagacac
gtgaaactacactttggcgacgaaatggtgaaggagggtgtgagtgcaagtaagttgtctaactcgaaaaaaaaaattaaccaaat
ttgcagcgcttgaattgtattccgcaaaaacaatcgaaaaaggccgtgtcattgagaaaagatggaataatgaaacgaaatcgt
cgtccaagaaacgaatcaccaaatgggatcagaagacaagccacatgcatgagtaaaggagaagaactttcactggagttgtcc
caattctgtgaattagatggtgatgtaatgggcacaaatctctgctagtgaggagggtgaaggatgcaacatcggaaaactac
cctaaattattgactactggaaaactacctgttccatggccaacactgtcactactctcacttggggtgttcaatgcttgaagatac
ccagatcatatgaaacagcatgacttttcaagagtgccatgccgaagggtatgtacaggaaagaactatattttcaagatgacgg
gaactacaagacacgtgctgaagtcaagttgaaggatgataccctgttaatagaatcgagttaaaaggattgatttaagaagatgg
aaacattctggacacaaattggaatacaactacatctcagacaatgtatacatcacggcagacaaacaaaagaatggaatcaaag
ctaactcaaaattagacacaacattgaagatggaggcgttcaactagcagaccattatcaacaaaactccaattggcgatggccc
tgcctttaccagacaaccattacctgtccacacaatcaagcttccgaaagatcccaacgaaaagagagaccacatggccttctga
gttgaacagctgctgggattacacatggcatggatgaaactatacaaaatacaactgatcaactctgtgcaataagcattatttttca
atcaaacatgaccttcgggtataatcttaactattgtttattcccctctgctggttccataataataaaaaaactcatgctctgat
actacagtttccagatcaattggaattcgaacagctgttcagattgaaatgtagttgcaagaattgatttctgtgtggagtgtgaa
caataagcatgactatagtggaaagagct
```

pGB618: *Cel-end-3::Can-ELT-3B::CFP*

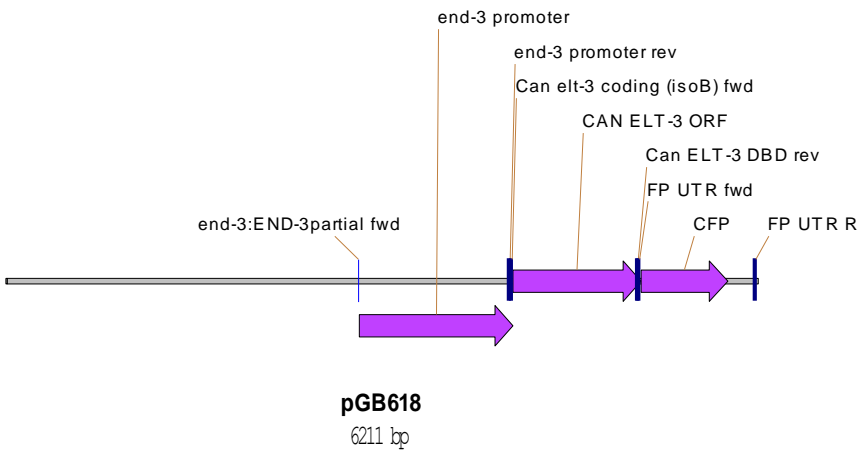

*Cel-elt-3* promoter (1290 bp amplified from N2 genomic DNA)

```
end-3:END-3partial_fwd cggccgctctagaactagtgcacccaatttagtgatatattttcc  
end-3 promoter_rev gagtattcatgtttatactttgaatgagaatgc
```

Can-elt-3 coding (1076 bp amplified from IDT synthesized minigene)

Can elt-3 coding (isoB)\_fwd aagtataaacatgaataactcaaagtcctctcg  
Can ELT-3 DBD\_rev ctttactcatgcatgtggcttctctctg

CFP UTR (988bp cassette –as in pGB612 (see above))

pGB618 sequence

tatcgataccgtcgacctcgagggggggcccggtaccagctttgtcccttagtgaggggtaatttcgagctggcgtaaatcatggca  
tagctgttctctgtgtgaaattgttatccgctcacaattccacacaacatacagagccggaagcataaagtgtaaagcctgggggcctaa  
tgagtgagctaacacattaattgctgtgctcactgccgcttccagctcgggaaacctgctgagcagctgcattaatgaatcggcc  
aacgcgcggggagagggcgtttgctattgggctcttccgctcctcgtcactgactcgtcgcctcggctcggctcggcgga  
gcggtatcagctcactcaaaggcgttaatacgggtatccacagaatcaggggataacgcaggaaagaacatgtgagcaaaaggc  
cagcaaaaggccaggaaccgtaaaaaggccgctgtggcgttttccataggctccgccccctgacgagcatcacaataatcg  
acgctcaagtcaaggtggcgaacccgacaggactataaagataccaggcgttccccctggaagctccctcgtcgcctcctctgtt  
ccgacctgcccgttaccggatacctgtccgcttctccctcgggaagcgtggcgttctcatagctcagctgtaggtatctcagttc  
gggtgaggtcgtcctcaagctgggctgtgtgcacgaacccccgttcagcccagcgtcgcctatccggttaactatcgtctga  
gtccaacccgtaagacacgacttatcgccactggcagcagccactgtaacaggattagcagagcaggtatgtaggcgggtgcta  
cagagttctgaagtgtggcctaactacggctacactagaaggacagtattggatctcgcctcgtgaagccagttacctcggaa  
aaagagttgtagctctgatccggcaaaacaaccacgctgtagcgggtggtttttgttgcaagcagcagattacgcgcagaaaa  
aaaggatcaagaagatcctttgatctttctacggggctgacgctcagtggaacgaaaactcacgtaagggttttggatcagat  
tatcaaaaaggatcttacctagatccttttaataaaaatgaagtttaaatcaatctaaagtatatatagtaaaactgggtcagcagtt  
accaatgcttaacagtgaggacatctcagcgtatctgtctatttctcctatccatagttgcctgactccccgctgtagataactacga  
tacgggagggcctaccatctgccccagtgctgcaatgataccgcgagaccacgctcaccggctccagattatcagcaataaacc  
agccagccggaaggggcagcgcagaagtgtcctgcaactttaccgctccatccagctctattaattgtgccgggaagctagagt  
aagtagttgccagttaatagtttgcgaacgttgttgcattgctacaggcatcgtggtgtcagctcgtcgttggatggcttcattcagc  
tccggtccaacgatcaaggcagttacatgatccccatggtgtgcaaaaaagcggtagctcctcggctcctccgatcgttgcaga  
agtaagtggccgagttatcactcatggtatggcagcactgcataattcttactgcatgccatccgtaagatgctttctgtgactg  
gtgagtactcaaccaagtcattctgagaatagtgtatcggcgaccgagttgctcttcccggcgtcaatacgggataataccgcgcc  
acatagcagaactttaaagtgtcatcattggaaaacgttctcggggcgaactcaaggatcttaccgctgttgagatccagttc  
gatgtaaccactcgtgcaccaactgatctcagcatctttacttccaccagcgttctgggtgagcaaaaacaggaaggcaaatg  
ccgcaaaaaagggaataaggggcgcacggaatgttgaatactcactcttcttttcaatattattgaagcattatcaggggtattgt  
ctcatgagcggatacatattgaatgtatttagaaaaataaacaataggggtccgcgcacatttcccgaaaagtgccacctgacgc  
gccctgtagcggcgattaagcgcggcgggtgtggtggttacgcgcagcgtgaccgctacactgccagcgccttagcgcgccgctcc  
ttcgtcttctccttctccttctcgcacgctcgcggcttccccgtcaagctctaaatcgggggctcccttaggggtccgatttagtgcctta  
cggcacctcgacccccaaaaaactgattaggggtgatggtcacgtagtgggcatcgccctgatagacgggttttcgccccttgacggtg  
gagtcacgcttcttaatagtgactctgttccaaactggaacaactcaaccctatctcggctattctttgattataagggtatttggc  
gatttcggcctattgggttaaaaaatgagctgatttaacaaaaatftaacgcgaattttaacaaaaatattaacgcttacaatttccattcgcca  
ttcaggctgcgcaactgttgggaaggcgatcgtgctgggctctcgtctattacgccagctggcgaagggggatgtgctgcaagg  
cgattaagtgggtaacgccagggtttccagtcacgacgttgaacacgacggccagtgattgaatacgaactcactataggcg  
aattggagctccaccggtggcggcgcctctagaactagtgcacaaatttagtgatatttctccttctcatatttctgtacaatttgc  
atttcttcaacctgttctagttcatatccggtgcaaaaactttattcatttactcgcgaactcagtcctactaaaatattgattctttgtaca

atgtgaaacttttcttttcttgatataatgaaattgtcacctgcttgaactgtgtaatgggtgttctggggtcacaagtaaaataaga  
gtttgcaaacctttgactgaaacgaaattggactttcaaacatttttacctaatttgagaaatgcatctttggctcaaagggtgagactca  
ctgtgtaggtctcgacgcaacaaaaatattcgcgcaaaaggcgtgttctttaaatagtactgtcgccaattaattttgcagttcta  
cagtatatcccacgtgggtcagagtgcccatatcggttgatctctgtagatctacgggaatagcggtaattgacgcagatttctcaact  
accaaaaatattgttggtgagaattgaacagaaaaagaagaagaaaaatacaagcatgtcgagctttacacaactttatctaataaat  
attcaattaattggatcagtttctttcagcaattacaaaaaattttgtccgtaaaaattgtgaatgattggattggagagaatcgagtttt  
ggaaaaataaaaaacaagagcaacgtgttatggtattatcatgtgatctttaaaatgcaaacgtgtatttaatttaattgtcccctatca  
gaacctctctaaattcacgtgttcaattccctcttttctctactcttctactctcgacgtgaaaaacttttccgaatgataattgtgttt  
aaaatggaaattttattgaagtaaaattatgaaacaaatacttttagtttaaattccgagatgcacttctatttgagagagcccacggtaaa  
taaaaaagaagtaaaagataaccaacaagatgttccaagtgtccgatggctccgacaaaagagtatacactgattgtataatcg  
gttagatgaatagctgaaagtataccacgttcaagcacaccccgctgtgtctcttagaaaaaggcgggtgtgaaaagtatacg  
gaacgctgaggcacgccctcttaccatgattgtctcaagataaatgaataggcattctcattcaagataaacatgaataactcaa  
agtctctcgggattcaaacctactacccaaactaccgcatcaagcactgatacatcatcacgtggaagtactcatgatgaataca  
ccaattccaagtatacatattcgccagcaaatatcatcatcttcatcatcaacaaaatcagaatcacaatcaaagtcagaatcataat  
caagtcaaaaattatcaagatcatcaatttgagcaacagatcaagaatatcatcaccaccaagaggcgcagccacaccatcaact  
accaccacaattcgagccaacaaatagttcaaatcacgagcttattattgtccatatacattcaacaacggagacaatacaagctccg  
gttactgtcgcctctgtgtctcccctccagctatcgctcattaatgaaggaagttcagatcaaaagaggagtttaacgaatattatgctcc  
caatccatcaatgaacgactatcgcggtgaaaagattgccaatccgttggtgacccatataattcaaattgagcaaccaatttataccga  
ttttgcaaattgctccgatgtcaatcaacaagatagctaaaccgatgaatttctccaccaactacatgggagccacacaattctccca  
ccaacagactgtgcaactcaattgtgatctcagcggcttctccacattcaactcgtgtgatccagctctaccattaatgcaccagtc  
ccttctcaacaaaattatgtgatgccacattcaactttacaccacctccacaagatccattggtcgtgaacaaaaaccacttgcaaa  
aagcgaatggctgccgtgcaatgtcatcaaaattcaattgtcaaaactgaagacacgtgaaactacactttggcgacgaaatggtg  
aaggaggtgtgagtgaacgctgcaattgtatttccgcaaaaacaatcgaaaaaggcgtgtcattgagaaaagatggaataat  
gaaacgaaatcgtcgtccaagaaacgaatcaccaatgggatcagaagacaagccacatgcatgagttaaaggagaagaactttt  
cactggagttgtcccaattctgttgaattagatggtgatgtaatgggcacaaaatttctgtcagtgagagggtgaaggatgcaacat  
acggaaaactaccctaaatttattgactactggaaaactacctgtccatggccaacactgtcactactctcacttggggtgttcaat  
gctttgcaagatacccagatcatatgaaacagcatgacttttcaagagtgccatgcccgaagggtatgtacaggaaagaactatatttt  
caaagatgacgggaactacaagacacgtgctgaagtcaagttgaaggatgataccctgttaatagaatcaggttaaaaggattgatt  
ttaaagaagatggaacattctggacacaaattggaatacaactacatctcagacaatgtatacatcacggcagacaaacaaaag  
aatggaatcaaagctaactcaaaaattagacacaacattgaagatggaggcgttcaactagcagaccattatcaacaaaatactcca  
attggcgatggccctgtcctttaccagacaaccattacctgtccacacaatctaagcttccgaaagatccaacgaaaagagagacc  
acatggtcctcttgagttgtaacagctgctgggattacacatggcatggatgaactatacaataatcaactctgtgcaataagcattat  
tattttctaatcaaacatgaccttccggtataatttaactattgttttatttcccctctgctggttccataataaataaaaaaaactcatg  
ctcttgatactacagtttccagatcaattgtgaattcgaacagctgttcagatttgaaatgtagtgtgcaagaattgatttctgtgtgga  
gtgtgaacaataagcatgactatagtggaaagagct

pGB619 (*hsp16.41promoter::ELT-3B::CFP::end-3\_3'UTR*)

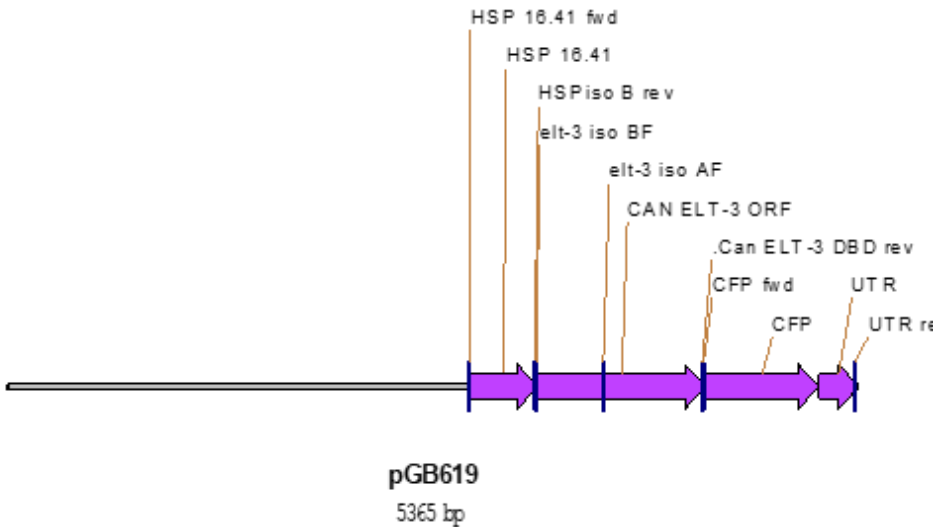

Heat-shock promoter (444bp amplified from pPD49.83)

HSP 16.41\_fwd cggccgctctagaactagtggatcaccaaacggaac

HSPiso B rev gagtattcatggatcccgatgaggatttc

Can-elt-3B coding (1076 bp amplified from IDT synthesized minigene)

elt-3 iso BF, atcgggatccatgaataactcaaagtcctctcgggattcaa

Can ELT-3 DBD\_rev cttactcatgcatgtggctgtcttctg

CFP UTR (988bp cassette –as in pGB612 (see above)

pGB619 sequence

```
tatcgataccgtcgacctcgagggggggcccggtagccagctttgtcccttagtgagggttaattcgagcttggcgtaatcatgggtca
tagctgttccctgtgtgaaattgttatccgctcacaattccacacaacatacgagccggaagcataaagtgtaaagcctggggtgcctaa
tgagtgagctaaactcacattaattgctgtgctcactgcccgttccagtcgggaaacctgtcgtgccagctgcattaatgaatcggcc
aacgcgcggggagaggcgggttgctattgggcgctctccgctcctcgtcactgactcgtcgcctcggtcgttcggctcggcgga
gcggtatcagctcactcaaaggcggtaatacgggtatccacagaatcaggggataacgcaggaaagaacatgtgagcaaaaggc
cagcaaaaggccaggaaccgtaaaaaggccggtgctggcgttttccataggctccgccccctgacgagcatcaaaaaatcg
acgctcaagtcagaggtggcgaaacccgacaggactataaagataccaggcgttccccctggaagctcccctcgtcgcctctcctgtt
ccgacctgcccgttaccggatacctgtccgccttctccctcgggaagcgtggcgcttctcatagctcacgctgtaggtatctcagttc
ggtgtaggctggtcctcaagctgggctgtgtgcacgaacccccgtcagcccgaccgctgcgcctatccggtaactatcgtcttga
gtccaacccggtaagacacgacttatcgccactggcagcagccactggtaacaggattagcagagcggaggtatgtaggcgggtgcta
```

cagagttctgaagtgggtggcctaactacggctacactagaaggacagtatttggtatctgcgctctgctgaagccagttaccttcgaa  
aaagagttgtagctctgatccggcaaacaccaccgctgtagcgggtgtttttgttgcaagcagcagattacgcgcagaaaa  
aaaggatctcaagaagatcctttgatctttctacggggtctgacgctcagtggaacgaaaactcacgtaagggttttggtcatgagat  
tatcaaaaaggatctcacctagatccttttaataaaaatgaagtttaaatcaatctaaagtatatatgagtaaactggctgacagtt  
accaatgcttaatcagtgaggcacctatctcagcgatctgtctatttctgctcatccatagttgcctgactccccgctgtagataactacga  
tacgggagggttaccatctgccccagtgctgcaatgataccgcgagaccacgctcaccggctccagattatcagcaataaacc  
agccagccggaagggccgagcgcagaagtggtctgcaactttatccgctccatccagcttattaattgttgcgggaagctagagt  
aagtagttgccagtaatagtttgcgcaacgttggcattgctacaggcatcgtggtgacgctcgtctgttggatggcttcattcagc  
tccggtcccaacgatcaaggcgagttacatgatccccatgttgtgcaaaaaagcggtagctccttggctcctccgatcgttgcaga  
agtaagtggccgagtggtatcactcatggttatggcagcactgcataattcttactgctatgccatccgtaagatgcttttctgactg  
gtgagtactcaaccaagtcattctgagaatagtgtatcgggcagcaggtgcttgcggcgtaatacgggataataccgcgcc  
acatagcagaactttaaagtgtcatcattgaaaacgttctcggggcgaaaaactcgaaggatctaccgctgttgagatccagttc  
gatgtaaccactcgtgcaccaactgatctcagcatctttacttaccagcgttctgggtgagcaaaaacaggaaggcaaatg  
ccgcaaaaaaggggaataagggcgacacggaaatgttgaatactcactcttcttttcaatattatgaagcattatcagggtattgt  
ctcatgagcggatacatatttgaatgtatttagaaaaataaacaataggggtccgcgcacattccccgaaaagtgccactgacgc  
gccctgtagcggcgattaagcgcggcggtgtggtggttacgcgagcgtgaccgctacactggcagcgccttagcggccgctcc  
ttcgtcttctcccttcttctcggcacgttcgcccgttccccgtcaagctctaaatcgggggctcccttaggggtccgatttagtctta  
cggcacctcgacccccaaaaacttgattaggggtatggtcacgtagtgggccatcgccctgatagacgggttttcgccccttgacgttg  
gagttccagttcttaatagtgactctgttccaaactggaacaactcaaccctatctcggctatcttttgattataagggttttgc  
gatttcggcctattggttaaaaaatgagctgatttaacaaaaatcgcgaatfttaacaaaatattaacgcttacaatttccattcggca  
ttcagggtcgcgaactgttgggaagggcgatcgggtcgggctctcgtctattacgccagctggcgaagggggatgtgctgcaagg  
cgattaagttgggtaacgccaggtttccagtcacgacgttgaaaacgacggccagtgaaatgtaatacactactatagggcg  
aattggagctccaccggtggcgccgctctagaactagtgatcaccaaaaacggaacgttgagctggacgaaatagtggtta  
aagtgacatgattatagttgaagattctaattcacaattagagcaaatgttctcggatatttatttcaacgggtattataactatttccactt  
ttctagaacattcgagctgctgttgcaaaaggagggcgactcacattcggtagatggaagtagtgtaacacaataaagagacca  
gatacatttccgtctcgtctcttgcaccaccgggagttttcaaacgaatgcatctaggacctctagaacattctgtaaggctgca  
gaatgcgggtatataaggaaagcgggctcagaggaagccaacacgcttgttctagtgcataaaaaactcgaaaatcctcatcg  
ggatccatgaatactcaaagtcctcctcgggattcaaactactaccaactcaccgactcaagcactgatacatcatcagtggtta  
gttactcatgatgaatacacaattccaagtatacatattcggcagcaaatatcatcttcatcatcaacaaaatcagaatcacaat  
caaagtcagaatcataatcaagtcaaaaattatcaagatcatcaatttgagcaacagtatcaagaatatcatcaccaccaagaggcg  
cagccacacatcaactaccaccacaattcagagccaacaaatagttcaaatcagagcttattattgtccatattcatcaacaacgg  
agacaatacaagctccggtactgtcgcctctgctgctccccctccagctatcgctcattaatgaaggaagttcagatcaaaagaggat  
ttaacgaatattatgctccaatccatcaatgaacgactatcggtgaaaagattgccaatccgttggctgaccatattcaaatga  
gcaaccaattataccgattttgcaaatgctccgatgctcaatcaacaagatagctaaaccgatgaatttccaccaactacatggg  
agccacacaatttcccaccaacagactgtgcaactcaattgctagatctcagcggcttctccacattcaactcgtgtgatccagctca  
ccattaatgaccagtcaccttctcaacaaaattatgtgatgccacattcaactttacaccacctccaagaatccattggtcgtgac  
aaaaaccactgtcaaaaagcgaatggctccgtgcaatgcatcaaaaatcaattgtcacaactgcaagacacgtgaaactacact  
ttggcgacgaaatggtgaaggagggtgtgagtgcaacgcttgaattgtatttccgcaaaaacaatcgaaaaaggccgttgcattga  
gaaaagatggaataatgaaacgaaatcgctgccaagaaacgaatcaccaaatgggatcagaagacaagccacatgcatgagta  
aaggagaagaactttcactggagttgccaattctgttgaattagatggtgatgtaattgggcacaaatctgtcagtgaggagggt  
gaagggtgatgcaacatacggaaaacttacccttaaatatttgcactactggaaaactacctgttccatggccaacactgtcactact  
tacttggggtgtcaatgcttgaagatacccagatcatatgaaacagcatgacttttcaagagtccatgcccgaagggtatgtaca  
ggaaagaactatatttcaagatgacgggaactacaagacagtgctgaagtcaagttgaagggtataccctgttaatagaatcg  
agttaaaaggattgatttaagaagatggaacattctggacacaaattggaatacaactacatctcagacaatgtatacatcag  
gcagacaaaacaaaagaatggaatcaaagctaactcaaaaattagacacaacattgaagatggaggcggtcaactagcagaccatt  
atcaacaaaactccaattggcgatggccctgtcctttaccagacaaccattacctgtccacacaatctaagcttccgaaagatcca  
acgaaaagagagaccacatggtccttctgagttgtaacagctgctgggattacacatggcatggaactatacaataatcaact

ctgtgcaataagcattatttttctaatacaaacatgaccttcggttataatctaactattgtttttatccctctgctggtttccataataaata  
aataaaaaaactcatgctcttgatactacagtttccagatcaattgtgaattcgaacagcttggtcagatttgaaatgtagtggtgcaag  
aattgatttcctgtgtggagtgtgaacaataagcatgactatagtggaagagct

pGB620 *hsp16-41promoter::ELT-3A::CFP::end-3\_3'UTR* - see notation in pGB619

Heat-shock promoter (444bp amplified from pPD49.83)

HSP 16.41\_fwd cggccgctctagaactagtggtacaccaaaaacggaac

HSP16.41 isoArev cttcctcatggatcccgatgaggattttc

Can elt-3 coding isoA (665bp amplified from IDT synthesized minigene (noted in pGB619 above))

elt-3 isoAF atcgggatccatgaaggaagttcagatcaaagaggag

Can ELT-3 DBD\_rev cttactcatgcatgtggcttctctctg

CFP UTR 988bp cassette –as in pGB612 (see above)

#### 4) smiFISH PROBESETS:

Conjugated FLAP-X oligos (CACTGAGTCCAGCTCGAACTTAGGAGG) that were 5' and 3' end-labelled with Quasar 570 or CalFluor 610 were synthesized by Biosearch Technologies. FLAP-X oligos that were 5' and 3' end-labelled with Cy5 or Cy3 were synthesized by IDT.

smiFISH antisense probesets (with complementary FLAP-X sequence added to 5' end of oligo (CAPS)):

*Can-skn-1*: 19 probes

CCTCCTAAGTTTCGAGCTGGACTCAGTGttcctttcgacaaatctcata  
CCTCCTAAGTTTCGAGCTGGACTCAGTGcaaatcttcatgcttgaatt  
CCTCCTAAGTTTCGAGCTGGACTCAGTGttcttctttgaaacatcttcc  
CCTCCTAAGTTTCGAGCTGGACTCAGTGtgtctgcacaatattttgtga  
CCTCCTAAGTTTCGAGCTGGACTCAGTGtcgctcaatgaaacattttgca  
CCTCCTAAGTTTCGAGCTGGACTCAGTGatgctcatttcggttaaattgt  
CCTCCTAAGTTTCGAGCTGGACTCAGTGattgaaaaacgtctcagcttgc  
CCTCCTAAGTTTCGAGCTGGACTCAGTGttgttcattgtattcgaatca  
CCTCCTAAGTTTCGAGCTGGACTCAGTGgtgtcgttgatcattggaatat  
CCTCCTAAGTTTCGAGCTGGACTCAGTGttggtggaattctcgaatatct



CCTCCTAAGTTTCGAGCTGGACTCAGTGcaagttgatcatgattagctgg  
CCTCCTAAGTTTCGAGCTGGACTCAGTGgtctcatcgaatgatatggatc  
CCTCCTAAGTTTCGAGCTGGACTCAGTGtctgatgacgtatcaacatcaga  
CCTCCTAAGTTTCGAGCTGGACTCAGTGctctctattatatcttggtgat  
CCTCCTAAGTTTCGAGCTGGACTCAGTGatagaatctgctagctggaatt  
CCTCCTAAGTTTCGAGCTGGACTCAGTGagtcaatggaatgacacgtgag  
CCTCCTAAGTTTCGAGCTGGACTCAGTGttgttcatcttttgattgtctt  
CCTCCTAAGTTTCGAGCTGGACTCAGTGctcatttcgcttatttgatgag  
CCTCCTAAGTTTCGAGCTGGACTCAGTGatgtgtcgattttgagtacttg

*Cmo-elt-3.2*: 24 probes

CCTCCTAAGTTTCGAGCTGGACTCAGTGaaaagcggcggaactcgaa  
CCTCCTAAGTTTCGAGCTGGACTCAGTGcgtgtcgcactactgttagc  
CCTCCTAAGTTTCGAGCTGGACTCAGTGttgtccaagtcctcgaactc  
CCTCCTAAGTTTCGAGCTGGACTCAGTGtctgtcgttcggccgaaagta  
CCTCCTAAGTTTCGAGCTGGACTCAGTGctgaatctccggcaacggag  
CCTCCTAAGTTTCGAGCTGGACTCAGTGcgtcgtatggcgctcaagaag  
CCTCCTAAGTTTCGAGCTGGACTCAGTGaaagtcttcgtaggccggtg  
CCTCCTAAGTTTCGAGCTGGACTCAGTGcatacgcgacgtgcttggg  
CCTCCTAAGTTTCGAGCTGGACTCAGTGgctatcgaaatgtagtggcc  
CCTCCTAAGTTTCGAGCTGGACTCAGTGatctgcacgacttgctgta  
CCTCCTAAGTTTCGAGCTGGACTCAGTGcgtcgcataatccatcgtagg  
CCTCCTAAGTTTCGAGCTGGACTCAGTGAatagacgtcgcctcgaac  
CCTCCTAAGTTTCGAGCTGGACTCAGTGctcttctctcctcgacgag  
CCTCCTAAGTTTCGAGCTGGACTCAGTGacttgagtccttgtagacac  
CCTCCTAAGTTTCGAGCTGGACTCAGTGtctcgcgggtttgcaattg  
CCTCCTAAGTTTCGAGCTGGACTCAGTGAagcattgcactcgtatctcg  
CCTCCTAAGTTTCGAGCTGGACTCAGTGtcttccggaagtacaggtg  
CCTCCTAAGTTTCGAGCTGGACTCAGTGtcagcggacgtgcaaagttg  
CCTCCTAAGTTTCGAGCTGGACTCAGTGtcttgacgatgtggttcttg  
CCTCCTAAGTTTCGAGCTGGACTCAGTGtctgtagtagacgtagcgcctc  
CCTCCTAAGTTTCGAGCTGGACTCAGTGAacacacgttcttgccggtg  
CCTCCTAAGTTTCGAGCTGGACTCAGTGtcaggtgtgccccaaagagct  
CCTCCTAAGTTTCGAGCTGGACTCAGTGtgggcgtactgctgctcgcc  
CCTCCTAAGTTTCGAGCTGGACTCAGTGtgcctcatcatccgatgcat

*Can-elt-3* (probeset1, detects both isoforms): 24 probes

CCTCCTAAGTTTCGAGCTGGACTCAGTGggattgggagctgtaaataac  
CCTCCTAAGTTTCGAGCTGGACTCAGTGAacgcgatagtcgttcattga  
CCTCCTAAGTTTCGAGCTGGACTCAGTGccaacggattggcaatctttt  
CCTCCTAAGTTTCGAGCTGGACTCAGTGtctggtataaattggtgctca  
CCTCCTAAGTTTCGAGCTGGACTCAGTGgattgagcatcggagcatttg  
CCTCCTAAGTTTCGAGCTGGACTCAGTGcatcgggttttagcatatcttg  
CCTCCTAAGTTTCGAGCTGGACTCAGTGccatgtagttggtggagaaat  
CCTCCTAAGTTTCGAGCTGGACTCAGTGtgttggtgggagaattgtgtg

CCTCCTAAGTTTCGAGCTGGACTCAGTGtctagcaaattgagttgcaca  
CCTCCTAAGTTTCGAGCTGGACTCAGTGacgagttgaatgtggagaagc  
CCTCCTAAGTTTCGAGCTGGACTCAGTGattaatggtagagctggatca  
CCTCCTAAGTTTCGAGCTGGACTCAGTGttgtgagaaggtgactggtg  
CCTCCTAAGTTTCGAGCTGGACTCAGTGgttgaatgtggcatcacataa  
CCTCCTAAGTTTCGAGCTGGACTCAGTGatcttgtggaggtggtgtaa  
CCTCCTAAGTTTCGAGCTGGACTCAGTGgttttgttcagcgaccaatg  
CCTCCTAAGTTTCGAGCTGGACTCAGTGagccattcgcttttgacaag  
CCTCCTAAGTTTCGAGCTGGACTCAGTGaattttgatgacattgcacgg  
CCTCCTAAGTTTCGAGCTGGACTCAGTGtgtcttcagtttgagcaaat  
CCTCCTAAGTTTCGAGCTGGACTCAGTGcatttcgtcgcaaagtgtag  
CCTCCTAAGTTTCGAGCTGGACTCAGTGtaciaaattgcaagcgttgac  
CCTCCTAAGTTTCGAGCTGGACTCAGTGtttttcgattgttttgcgga  
CCTCCTAAGTTTCGAGCTGGACTCAGTGtcttttctcaatgacaacggc  
CCTCCTAAGTTTCGAGCTGGACTCAGTGacgatttcgtttcattattcc  
CCTCCTAAGTTTCGAGCTGGACTCAGTGcatttggtgattcgtttcttg

*Can-elt-3B*-specific (probeset2): 16 probes

CCTCCTAAGTTTCGAGCTGGACTCAGTGccgagaggactttgagtatt  
CCTCCTAAGTTTCGAGCTGGACTCAGTGagtttgggtagtaggttga  
CCTCCTAAGTTTCGAGCTGGACTCAGTGtgtatcagtgcttgaatgcg  
CCTCCTAAGTTTCGAGCTGGACTCAGTGtcatgagtaactaccacgt  
CCTCCTAAGTTTCGAGCTGGACTCAGTGgtatcacttgaattggtgt  
CCTCCTAAGTTTCGAGCTGGACTCAGTGtgatgataattgctggcga  
CCTCCTAAGTTTCGAGCTGGACTCAGTGtgtgattctgattttgtga  
CCTCCTAAGTTTCGAGCTGGACTCAGTGgcacttgattatgattctga  
CCTCCTAAGTTTCGAGCTGGACTCAGTGgttgcctcaaattgatgatct  
CCTCCTAAGTTTCGAGCTGGACTCAGTGcttgggtggtgatgatattct  
CCTCCTAAGTTTCGAGCTGGACTCAGTGtgtgggtgtagttgatggtg  
CCTCCTAAGTTTCGAGCTGGACTCAGTGtgaactatttgggtcga  
CCTCCTAAGTTTCGAGCTGGACTCAGTGtccgttggatggatgg  
CCTCCTAAGTTTCGAGCTGGACTCAGTGagtaaccggagcttgtattg  
CCTCCTAAGTTTCGAGCTGGACTCAGTGctggaaggggagcagcagag  
CCTCCTAAGTTTCGAGCTGGACTCAGTGcttcctcattaaatgagcg

*Can-elt-2*: 24 probes

CCTCCTAAGTTTCGAGCTGGACTCAGTGggattgggagctgtaaataac  
CCTCCTAAGTTTCGAGCTGGACTCAGTgaacgcgatagtcgttcattga  
CCTCCTAAGTTTCGAGCTGGACTCAGTGccaacggattggcaatctttt  
CCTCCTAAGTTTCGAGCTGGACTCAGTGtccgtataaattggttctca  
CCTCCTAAGTTTCGAGCTGGACTCAGTGgattgagcatcggagcatttg  
CCTCCTAAGTTTCGAGCTGGACTCAGTGcatcgggttagcatatcttg  
CCTCCTAAGTTTCGAGCTGGACTCAGTGccatgtagttggtggagaaat  
CCTCCTAAGTTTCGAGCTGGACTCAGTGtgttgggtgggagaattgtgtg

CCTCCTAAGTTTCGAGCTGGACTCAGTGtctagcaaattgagttgcaca  
CCTCCTAAGTTTCGAGCTGGACTCAGTGaccgagttgaatgtggagaagc  
CCTCCTAAGTTTCGAGCTGGACTCAGTGattaatgtagagctggatca  
CCTCCTAAGTTTCGAGCTGGACTCAGTGttgtgagaaggtgactggg  
CCTCCTAAGTTTCGAGCTGGACTCAGTGgttgaatgtggcatcacataa  
CCTCCTAAGTTTCGAGCTGGACTCAGTGatcttgtggaggtggtgtaa  
CCTCCTAAGTTTCGAGCTGGACTCAGTGgtttttgtcagcgaccaatg  
CCTCCTAAGTTTCGAGCTGGACTCAGTGagccattcgcttttgacaag  
CCTCCTAAGTTTCGAGCTGGACTCAGTgaattttgatgacattgcacgg  
CCTCCTAAGTTTCGAGCTGGACTCAGTGtgtcttgacgtttgagcaaat  
CCTCCTAAGTTTCGAGCTGGACTCAGTGcatttcgtcgcaaagtgtag  
CCTCCTAAGTTTCGAGCTGGACTCAGTGtaciaaattgcaagcgttgac  
CCTCCTAAGTTTCGAGCTGGACTCAGTGtttttcgattgttttgcgga  
CCTCCTAAGTTTCGAGCTGGACTCAGTGtcttttctcaatgacaacggc  
CCTCCTAAGTTTCGAGCTGGACTCAGTGaccgatttcgtttcattattcc  
CCTCCTAAGTTTCGAGCTGGACTCAGTGcatttggtgattcgtttcttg

*Can-elt-5*: 24 probes

CCTCCTAAGTTTCGAGCTGGACTCAGTGtgatgatgactcgatttgtgc  
CCTCCTAAGTTTCGAGCTGGACTCAGTGgttaattcgggagtttcagcg  
CCTCCTAAGTTTCGAGCTGGACTCAGTGttgatttcggtgcaattgta  
CCTCCTAAGTTTCGAGCTGGACTCAGTGgaatttatccatcatttgtgc  
CCTCCTAAGTTTCGAGCTGGACTCAGTGctctcaagtctcatatacatca  
CCTCCTAAGTTTCGAGCTGGACTCAGTGtccctctctttatcactgataa  
CCTCCTAAGTTTCGAGCTGGACTCAGTGcacgattaatcgattccttgg  
CCTCCTAAGTTTCGAGCTGGACTCAGTGagaaaatttccgaattctgcgc  
CCTCCTAAGTTTCGAGCTGGACTCAGTGtgtcgtttctcatctgataatc  
CCTCCTAAGTTTCGAGCTGGACTCAGTGgaaatggtgaactagccgagac  
CCTCCTAAGTTTCGAGCTGGACTCAGTGgatcgaacataaatccgtttgc  
CCTCCTAAGTTTCGAGCTGGACTCAGTGtattcatcatttgttgggtg  
CCTCCTAAGTTTCGAGCTGGACTCAGTGggtttctggagttttgttgg  
CCTCCTAAGTTTCGAGCTGGACTCAGTGcgtatggtgatgtttgatgtg  
CCTCCTAAGTTTCGAGCTGGACTCAGTGtgaattgttggatggtgtg  
CCTCCTAAGTTTCGAGCTGGACTCAGTGatcttcatcattattcgaagcg  
CCTCCTAAGTTTCGAGCTGGACTCAGTGtttggctgcatacaattcgag  
CCTCCTAAGTTTCGAGCTGGACTCAGTGgatgagtccgatgtaatcgata  
CCTCCTAAGTTTCGAGCTGGACTCAGTGtgttgaatgaaatctttgcgca  
CCTCCTAAGTTTCGAGCTGGACTCAGTGtgcgttttgatttgatacatca  
CCTCCTAAGTTTCGAGCTGGACTCAGTGcatggctagaagttgactgaac  
CCTCCTAAGTTTCGAGCTGGACTCAGTGatgagaaggcgttgggtgatt  
CCTCCTAAGTTTCGAGCTGGACTCAGTGtgagttgattgaattgctcaa  
CCTCCTAAGTTTCGAGCTGGACTCAGTGtattcaattgctcctgaacttg

*Can-elt-1*: 24 probes

CCTCCTAAGTTTCGAGCTGGACTCAGTGcgcaatttacacactctcgg

CCTCCTAAGTTTCGAGCTGGACTCAGTGccaaagtggcgtgtttgaa  
CCTCCTAAGTTTCGAGCTGGACTCAGTGgcaaagataatgccgccc  
CCTCCTAAGTTTCGAGCTGGACTCAGTGgtgataataatccacaggcat  
CCTCCTAAGTTTCGAGCTGGACTCAGTGccgattttgtccgttcatt  
CCTCCTAAGTTTCGAGCTGGACTCAGTGcttttcggcttcaccaacg  
CCTCCTAAGTTTCGAGCTGGACTCAGTGtcgttttgagtctctgtc  
CCTCCTAAGTTTCGAGCTGGACTCAGTGatttacacatgatacgccgg  
CCTCCTAAGTTTCGAGCTGGACTCAGTGtgttgtgtgttcgtttgc  
CCTCCTAAGTTTCGAGCTGGACTCAGTGggaaccatttcgtcgccaaa  
CCTCCTAAGTTTCGAGCTGGACTCAGTGtgcattacaaactggctctc  
CCTCCTAAGTTTCGAGCTGGACTCAGTGtcaacctgatgcagctata  
CCTCCTAAGTTTCGAGCTGGACTCAGTGttttcatcgtcaatggtcg  
CCTCCTAAGTTTCGAGCTGGACTCAGTGcgatttctcgtctgaattcc  
CCTCCTAAGTTTCGAGCTGGACTCAGTGcctcctttgtgtcaatt  
CCTCCTAAGTTTCGAGCTGGACTCAGTGcaaatccattttcccatcg  
CCTCCTAAGTTTCGAGCTGGACTCAGTGagcagctgcatttacagatg  
CCTCCTAAGTTTCGAGCTGGACTCAGTGcttcattcccaaacagtgg  
CCTCCTAAGTTTCGAGCTGGACTCAGTGcattggtgtgtgtgaag  
CCTCCTAAGTTTCGAGCTGGACTCAGTGtctcctgatgatgcatta  
CCTCCTAAGTTTCGAGCTGGACTCAGTGattattgtggcgaatggat  
CCTCCTAAGTTTCGAGCTGGACTCAGTGtcatcgattgtggggtgaa  
CCTCCTAAGTTTCGAGCTGGACTCAGTGtccatgattggaattgatga  
CCTCCTAAGTTTCGAGCTGGACTCAGTGcaggtcgtgcaataattgt

*Cel-skn-1*: 19 probes

CCTCCTAAGTTTCGAGCTGGACTCAGTGaatgtaggcgtagttggatgtt  
CCTCCTAAGTTTCGAGCTGGACTCAGTGtgaagactgtcgtttgcatt  
CCTCCTAAGTTTCGAGCTGGACTCAGTGaatctgtccatttgataaac  
CCTCCTAAGTTTCGAGCTGGACTCAGTGgtggattgataggaatgatcat  
CCTCCTAAGTTTCGAGCTGGACTCAGTGagaggagacagtggagtctgac  
CCTCCTAAGTTTCGAGCTGGACTCAGTGttgacgtcctgaagatccaatg  
CCTCCTAAGTTTCGAGCTGGACTCAGTGaacgattgagtagctgttgca  
CCTCCTAAGTTTCGAGCTGGACTCAGTGtctctgtgagtgatatggatcga  
CCTCCTAAGTTTCGAGCTGGACTCAGTGgtagtgaatcactaaacgagt  
CCTCCTAAGTTTCGAGCTGGACTCAGTGcgagagcacgttgatgacgaat  
CCTCCTAAGTTTCGAGCTGGACTCAGTGtatcgtggagattccgaagaga  
CCTCCTAAGTTTCGAGCTGGACTCAGTGaactttccgtagaaacgagact  
CCTCCTAAGTTTCGAGCTGGACTCAGTGtgatgaacgtggagacgatgat  
CCTCCTAAGTTTCGAGCTGGACTCAGTGaacaactctcgcgatcttaac  
CCTCCTAAGTTTCGAGCTGGACTCAGTGaatgacatctccgaaatctgga  
CCTCCTAAGTTTCGAGCTGGACTCAGTGttcttcaacactgttgcaact  
CCTCCTAAGTTTCGAGCTGGACTCAGTGtctttgatactcgtgagactc  
CCTCCTAAGTTTCGAGCTGGACTCAGTGtgcacgaatcttgcgaatcaac  
CCTCCTAAGTTTCGAGCTGGACTCAGTGatgatgtaatggacatctgt

*Cel-elt-3*: 18 probes

CCTCCTAAGTTTCGAGCTGGACTCAGTGttttccactcgataatcgttc  
CCTCCTAAGTTTCGAGCTGGACTCAGTGtatggatctagtagtggttg  
CCTCCTAAGTTTCGAGCTGGACTCAGTGtaggtcggttggtcaagttgaa  
CCTCCTAAGTTTCGAGCTGGACTCAGTGcagtacctgtgcattagtgaag  
CCTCCTAAGTTTCGAGCTGGACTCAGTGAagttcatctggagcatttctt  
CCTCCTAAGTTTCGAGCTGGACTCAGTGtaactgtggataatggtgttg  
CCTCCTAAGTTTCGAGCTGGACTCAGTGtgtgtgactgtgctgtattca  
CCTCCTAAGTTTCGAGCTGGACTCAGTGatattgaacggcatttgatgtg  
CCTCCTAAGTTTCGAGCTGGACTCAGTGtgttgcaagttgaaaggttc  
CCTCCTAAGTTTCGAGCTGGACTCAGTGgtgagctgttgagaagtggaaag  
CCTCCTAAGTTTCGAGCTGGACTCAGTGttgacattgtgtgtatggat  
CCTCCTAAGTTTCGAGCTGGACTCAGTGCattctttttcatcggcttc  
CCTCCTAAGTTTCGAGCTGGACTCAGTGattttgatgacattgtacagct  
CCTCCTAAGTTTCGAGCTGGACTCAGTGtgtttgcaatttgagcagatg  
CCTCCTAAGTTTCGAGCTGGACTCAGTGgttttccggaagtagagattg  
CCTCCTAAGTTTCGAGCTGGACTCAGTGtaagagacagtgagcgttttcg  
CCTCCTAAGTTTCGAGCTGGACTCAGTGttctcttcataattccatcttt  
CCTCCTAAGTTTCGAGCTGGACTCAGTGgagtttgagactcatttctag

*Cel-end-3*: 20 probes

CCTCCTAAGTTTCGAGCTGGACTCAGTGgaagagaatgagttcgagtaca  
CCTCCTAAGTTTCGAGCTGGACTCAGTGAagacattggtgagttggaaga  
CCTCCTAAGTTTCGAGCTGGACTCAGTGgggaaactgagggaaatccaaaa  
CCTCCTAAGTTTCGAGCTGGACTCAGTGttcttcattgaattggactgt  
CCTCCTAAGTTTCGAGCTGGACTCAGTGatattctggaggacatctggag  
CCTCCTAAGTTTCGAGCTGGACTCAGTGttgtgccggataatgatgataa  
CCTCCTAAGTTTCGAGCTGGACTCAGTGCattgtatgaattgtcgtcat  
CCTCCTAAGTTTCGAGCTGGACTCAGTGctgttgcaattgtcatag  
CCTCCTAAGTTTCGAGCTGGACTCAGTGaccattatctggtgcataaaa  
CCTCCTAAGTTTCGAGCTGGACTCAGTGgatagttttcattgtatgcc  
CCTCCTAAGTTTCGAGCTGGACTCAGTGattaataggcgtcgtgaattca  
CCTCCTAAGTTTCGAGCTGGACTCAGTGttgatggaagttgagattgct  
CCTCCTAAGTTTCGAGCTGGACTCAGTGCatggaattttcattgtgtcg  
CCTCCTAAGTTTCGAGCTGGACTCAGTGcttgaactcttgagctggaaa  
CCTCCTAAGTTTCGAGCTGGACTCAGTGtattttcgaagcttttctagc  
CCTCCTAAGTTTCGAGCTGGACTCAGTGatgcattgtggaaatcttcttg  
CCTCCTAAGTTTCGAGCTGGACTCAGTGacaattggagcacgaagagttg  
CCTCCTAAGTTTCGAGCTGGACTCAGTGtcggttcgtaagattacacgga  
CCTCCTAAGTTTCGAGCTGGACTCAGTGAagatggtgtgtctttatgt  
CCTCCTAAGTTTCGAGCTGGACTCAGTGtagagtcaacaagtgagcaac

*Cel-end-1*: 20 probes

CCTCCTAAGTTTCGAGCTGGACTCAGTGtggggagatggagatgaagaag

CCTCCTAAGTTTCGAGCTGGACTCAGTGatgactccataggtatatggaa  
CCTCCTAAGTTTCGAGCTGGACTCAGTGttcatgggaatgaacatttcc  
CCTCCTAAGTTTCGAGCTGGACTCAGTGttccatgattatccgaaaat  
CCTCCTAAGTTTCGAGCTGGACTCAGTGtacatttgtgtagcatcgagtg  
CCTCCTAAGTTTCGAGCTGGACTCAGTGtcaaaatattgatctccaccac  
CCTCCTAAGTTTCGAGCTGGACTCAGTGgattgaacaaagtattgccc  
CCTCCTAAGTTTCGAGCTGGACTCAGTGtatcgagacttccaaacattgg  
CCTCCTAAGTTTCGAGCTGGACTCAGTGgatactgttggagtagcaatt  
CCTCCTAAGTTTCGAGCTGGACTCAGTGgttgatagcttgtccaattt  
CCTCCTAAGTTTCGAGCTGGACTCAGTGgactggtggaatatttccgatt  
CCTCCTAAGTTTCGAGCTGGACTCAGTGgttcacaatttgcgatttga  
CCTCCTAAGTTTCGAGCTGGACTCAGTGagagttcgtggaacgttgag  
CCTCCTAAGTTTCGAGCTGGACTCAGTGtcacgagttctacaatttggat  
CCTCCTAAGTTTCGAGCTGGACTCAGTGgaatcagttcttccatagag  
CCTCCTAAGTTTCGAGCTGGACTCAGTGatttttcggaagtacagggag  
CCTCCTAAGTTTCGAGCTGGACTCAGTGtttccattattgtttacggca  
CCTCCTAAGTTTCGAGCTGGACTCAGTGtgggttggagattgtactcg  
CCTCCTAAGTTTCGAGCTGGACTCAGTGattatgacatagtttcgagtct  
CCTCCTAAGTTTCGAGCTGGACTCAGTGtgtgatggaatgttctgtagt

*Cel-elt-2*: 24 probes

CCTCCTAAGTTTCGAGCTGGACTCAGTGcagccgttgacattatcatt  
CCTCCTAAGTTTCGAGCTGGACTCAGTGcattatttctctgtgga  
CCTCCTAAGTTTCGAGCTGGACTCAGTGttgcccgttcaattggagat  
CCTCCTAAGTTTCGAGCTGGACTCAGTGtagttatttggccactgt  
CCTCCTAAGTTTCGAGCTGGACTCAGTGtgagtagtctatgccagtat  
CCTCCTAAGTTTCGAGCTGGACTCAGTGgttgggtccaacattccaaa  
CCTCCTAAGTTTCGAGCTGGACTCAGTGagtgtttacgggaattccac  
CCTCCTAAGTTTCGAGCTGGACTCAGTGtggagttgtatatcccgaa  
CCTCCTAAGTTTCGAGCTGGACTCAGTGgaatactggggtcgtagaca  
CCTCCTAAGTTTCGAGCTGGACTCAGTGgccacagttgataagtaga  
CCTCCTAAGTTTCGAGCTGGACTCAGTGtgtgagcatttgacgcattc  
CCTCCTAAGTTTCGAGCTGGACTCAGTGgtgtggaacagttgacgcac  
CCTCCTAAGTTTCGAGCTGGACTCAGTGactggaggagaatacgtggt  
CCTCCTAAGTTTCGAGCTGGACTCAGTGtttagaggattgcttggca  
CCTCCTAAGTTTCGAGCTGGACTCAGTGcaattggagcacacaagtcc  
CCTCCTAAGTTTCGAGCTGGACTCAGTGcatttcttccagagagtt  
CCTCCTAAGTTTCGAGCTGGACTCAGTGggagtttgaagtaaagcccg  
CCTCCTAAGTTTCGAGCTGGACTCAGTGctgtaaagcaccttcttct  
CCTCCTAAGTTTCGAGCTGGACTCAGTGcgttgatggtgtggaagagt  
CCTCCTAAGTTTCGAGCTGGACTCAGTGtctctcaaactccttctc  
CCTCCTAAGTTTCGAGCTGGACTCAGTGcggcatgtgacacatatgtg  
CCTCCTAAGTTTCGAGCTGGACTCAGTGtactgtacgtttagctggc  
CCTCCTAAGTTTCGAGCTGGACTCAGTGttgttgcatacacgtag  
CCTCCTAAGTTTCGAGCTGGACTCAGTGctggcatcacatgaactgg

*Cpo-elt-3*: 22 probes

CCTCCTAAGTTTCGAGCTGGACTCAGTGtgcgagtagaagctgttca  
CCTCCTAAGTTTCGAGCTGGACTCAGTGcggattctgtagattgtggg  
CCTCCTAAGTTTCGAGCTGGACTCAGTGattccagtcattgtagtgg  
CCTCCTAAGTTTCGAGCTGGACTCAGTGcttgctgatccgaattgtt  
CCTCCTAAGTTTCGAGCTGGACTCAGTGgcaaattcggagctgttga  
CCTCCTAAGTTTCGAGCTGGACTCAGTGagttatcagtggttctgc  
CCTCCTAAGTTTCGAGCTGGACTCAGTGggaatcgctggcaatggag  
CCTCCTAAGTTTCGAGCTGGACTCAGTGacttgagttccttcatgaa  
CCTCCTAAGTTTCGAGCTGGACTCAGTGtccagctgtataatagtcgt  
CCTCCTAAGTTTCGAGCTGGACTCAGTGttttcaacgcgatagtcgc  
CCTCCTAAGTTTCGAGCTGGACTCAGTGggttgtccaattgagtga  
CCTCCTAAGTTTCGAGCTGGACTCAGTGtgggtgttggtaaattccg  
CCTCCTAAGTTTCGAGCTGGACTCAGTGcatgtggttcatcatgtctt  
CCTCCTAAGTTTCGAGCTGGACTCAGTGgttactggcattactgtcat  
CCTCCTAAGTTTCGAGCTGGACTCAGTGagggaatgctgagagggtga  
CCTCCTAAGTTTCGAGCTGGACTCAGTGgctcgcgaaactgatgtgtg  
CCTCCTAAGTTTCGAGCTGGACTCAGTgaaggcgattgatgcatcagt  
CCTCCTAAGTTTCGAGCTGGACTCAGTGtgaatgtgcagccattacg  
CCTCCTAAGTTTCGAGCTGGACTCAGTGctaatggatcttgggtggt  
CCTCCTAAGTTTCGAGCTGGACTCAGTGttttagggcattggacagc  
CCTCCTAAGTTTCGAGCTGGACTCAGTGgcaatgagagtggtcgttg  
CCTCCTAAGTTTCGAGCTGGACTCAGTGatttcttcatgatgcat

*Cpo-elt-2*: 22 probes

CCTCCTAAGTTTCGAGCTGGACTCAGTgaattgtcctccattcacat  
CCTCCTAAGTTTCGAGCTGGACTCAGTGatgtgatgtaggttgttctg  
CCTCCTAAGTTTCGAGCTGGACTCAGTGgtgtttcaatgattggcggga  
CCTCCTAAGTTTCGAGCTGGACTCAGTGcttattaccagacttgggtg  
CCTCCTAAGTTTCGAGCTGGACTCAGTGttagaattaccgatccg  
CCTCCTAAGTTTCGAGCTGGACTCAGTGgaacacaccaatccttgacg  
CCTCCTAAGTTTCGAGCTGGACTCAGTGctccacagagtgtattgt  
CCTCCTAAGTTTCGAGCTGGACTCAGTGgcagctttagtaaagacca  
CCTCCTAAGTTTCGAGCTGGACTCAGTGgaccttcttctcatcgaa  
CCTCCTAAGTTTCGAGCTGGACTCAGTGtttcttttctagtttgca  
CCTCCTAAGTTTCGAGCTGGACTCAGTGgagttgagtgtttcactc  
CCTCCTAAGTTTCGAGCTGGACTCAGTGttctttgtgcgggaacttg  
CCTCCTAAGTTTCGAGCTGGACTCAGTGgcagcagtagatccatcaaa  
CCTCCTAAGTTTCGAGCTGGACTCAGTGatgaagcatttctagcagcg  
CCTCCTAAGTTTCGAGCTGGACTCAGTGgatgggtttctgaagcc  
CCTCCTAAGTTTCGAGCTGGACTCAGTGcacgatgctgttgtaagt  
CCTCCTAAGTTTCGAGCTGGACTCAGTgaatatgagcgtcttgcgacg  
CCTCCTAAGTTTCGAGCTGGACTCAGTGctaggccaaatgtgtaag  
CCTCCTAAGTTTCGAGCTGGACTCAGTGagacagttgttgggaagct  
CCTCCTAAGTTTCGAGCTGGACTCAGTGccggtatgactgaagatct



CCTCCTAAGTTTCGAGCTGGACTCAGTGgcttttgttcatcgtcttg  
CCTCCTAAGTTTCGAGCTGGACTCAGTGgtagtgcttccaaatctct

*Can-myo-2*: 22 probes

CCTCCTAAGTTTCGAGCTGGACTCAGTGAaccttttgctcattcatgg  
CCTCCTAAGTTTCGAGCTGGACTCAGTGAagagcgcggtattgatgtt  
CCTCCTAAGTTTCGAGCTGGACTCAGTGtgaagtctcgcctcaatt  
CCTCCTAAGTTTCGAGCTGGACTCAGTGcttcaagcgattgcatgagt  
CCTCCTAAGTTTCGAGCTGGACTCAGTGttgagcaatcttgagctctc  
CCTCCTAAGTTTCGAGCTGGACTCAGTGttgttcgcttccaaattca  
CCTCCTAAGTTTCGAGCTGGACTCAGTGctcatcagccaattgatctt  
CCTCCTAAGTTTCGAGCTGGACTCAGTGatctatcagcacggtgacga  
CCTCCTAAGTTTCGAGCTGGACTCAGTGagctcatcgaattcagcttg  
CCTCCTAAGTTTCGAGCTGGACTCAGTGttgatcttcgagttgctcat  
CCTCCTAAGTTTCGAGCTGGACTCAGTGcttctccaaatcacgacgg  
CCTCCTAAGTTTCGAGCTGGACTCAGTGtgagttgctctccgaattta  
CCTCCTAAGTTTCGAGCTGGACTCAGTGtgaattgttcgactggtc  
CCTCCTAAGTTTCGAGCTGGACTCAGTGtttttcgatgcggttcttt  
CCTCCTAAGTTTCGAGCTGGACTCAGTGagaagtctgacttcatgtcc  
CCTCCTAAGTTTCGAGCTGGACTCAGTGttcgtcagccttaagacgaa  
CCTCCTAAGTTTCGAGCTGGACTCAGTGtcaaacgtcccttgatgaa  
CCTCCTAAGTTTCGAGCTGGACTCAGTGtagcgtgatccaattcgttg  
CCTCCTAAGTTTCGAGCTGGACTCAGTGcttgacaagttcgagaggt  
CCTCCTAAGTTTCGAGCTGGACTCAGTGccttgagttgtcaagtca  
CCTCCTAAGTTTCGAGCTGGACTCAGTGttggagttgacgagtagctt  
CCTCCTAAGTTTCGAGCTGGACTCAGTGattcatcggctccaataagt

*Can-efl-3 (eef1A.1)*: 16 probes

CCTCCTAAGTTTCGAGCTGGACTCAGTGgcgacttgaacgaaccttt  
CCTCCTAAGTTTCGAGCTGGACTCAGTGcaatggtgataccacgttca  
CCTCCTAAGTTTCGAGCTGGACTCAGTGcctggagcatcaataatggt  
CCTCCTAAGTTTCGAGCTGGACTCAGTGcttgacaccaagagttggg  
CCTCCTAAGTTTCGAGCTGGACTCAGTGttgttcaggaacgatcaa  
CCTCCTAAGTTTCGAGCTGGACTCAGTGgaaacgggcctcagagaatg  
CCTCCTAAGTTTCGAGCTGGACTCAGTGccgatcttctgatgaatcc  
CCTCCTAAGTTTCGAGCTGGACTCAGTGacgaatggaacagcctttgg  
CCTCCTAAGTTTCGAGCTGGACTCAGTGAacttcgagcatgttctc  
CCTCCTAAGTTTCGAGCTGGACTCAGTGgacgtcttgagtggaagac  
CCTCCTAAGTTTCGAGCTGGACTCAGTGacttcagtggtagcgttttg  
CCTCCTAAGTTTCGAGCTGGACTCAGTGtgacgttgaatccgacgttg  
CCTCCTAAGTTTCGAGCTGGACTCAGTGatgtccttgacggaacgtt  
CCTCCTAAGTTTCGAGCTGGACTCAGTGtttcgagtcagagcagactg  
CCTCCTAAGTTTCGAGCTGGACTCAGTGagaactggagtgtaaccagc  
CCTCCTAAGTTTCGAGCTGGACTCAGTGccttgagctcgttgaatttg

5) CRISPR/Cas9 PCR primers and sequence of *ir79* allele

*Can-elt-3* crRNA targeting site 1 :gtgcttgaatgCGGTGAGTTGG

*Can-elt-3* crRNA targeting site 2: gaattctccaccaactacatgg

Primers used to identify deletion mutant:

Elt-3CC1F: 5'-ctgactgtttgaggctgctcaaaaacaac-3'

Elt-3CC1B: 5'-caaattgaatttgatgacattgcacggc-3'

Sequence of *ir79* deletion:

tctggtagctcactgctcctgggaaggtagcagtactatatatagtgcatgCGCAATTCATTACCTCCCTTTTcattaaaaataatcttaa  
tattttttgtgatgatagataattttttgtagtattgcttttactgactgtttgaggctgctcaaaaacaacaaaactgtttttctccatttt  
ggtagctttcgaaatcgatcgttattatcagttgtttttcagacactaacaacaaaatgaatactcaaagtcctctcgggattcaaaccta  
ctacca

(DELETION, 2916 base pairs)

tgggagccacacaattctccaccaacagactgtgcaactcaattgctagatctcagcggcttctccacattcaactcgtgtgatccag  
ctctaccattaatgcaccagtcaccttctcaacaaaattatgtgatgccacattcaactttacaccacctccacaagatccattggtcgct  
gaacaaaaaccactgtcaaaaagcgaatggctgtaagttttttttttttgaaaacgggtttattgatttccttgttgacagaaaaca  
gtgatttcagaaaaacaagag
